# Supplementary material for: Phosphine-catalyzed asymmetric [3 + 2] annulation of chalcones with allenoates for enantioselective synthesis of functionalized cyclopentenes
Source: Royal Society of Chemistry journal article supplement (doi:10.1039/c5ra20603k), 2015-01-01
Supplement: c5ra20603k1.pdf [file c5ra20603k1.pdf]

Electronic Supplementary Information

**Phosphine-Catalyzed Asymmetric [3 + 2] Annulation of  
Chalcones with Allenates for Enantioselective Synthesis of  
Functionalized Cyclopentenes**

Zhenzhen Gao, Chang Wang, Chunhao Yuan, Leijie Zhou, Zhanhu Sun, Yumei Xiao\*, and

Hongchao Guo\*

Department of Applied Chemistry, China Agricultural University, Beijing 100193, China

Email: xiaoyumei23@126.com, hchguo@cau.edu.cn

**Contents**

|                                                                             |         |
|-----------------------------------------------------------------------------|---------|
| General Information                                                         | S2      |
| Preparation of Boc-Amino-Substituted Chalcones <b>1</b>                     | S3      |
| General Procedure for Asymmetric [3 + 2] Annulation                         | S3      |
| A Typical Procedure for Epoxidation of the Product                          | S3      |
| Characterization Data of the Products <b>3</b>                              | S4–S16  |
| <sup>1</sup> H NMR and <sup>13</sup> C NMR Spectra of the Products <b>3</b> | S17–S44 |
| HPLC Chromatograms of the Products <b>3</b>                                 | S45–S70 |
| X-Ray Crystallographic Data of <b>3ab</b>                                   | S71–S84 |

## General Information

All reactions were performed under N<sub>2</sub> atmospheres in oven-dried glassware with magnetic stirring. Unless otherwise stated, all reagents were purchased from commercial suppliers and used without further purification. All solvents were purified and dried according to standard methods prior to use. Organic solutions were concentrated under reduced pressure on a rotary evaporator or an oil pump. Reactions were monitored through thin layer chromatography (TLC) on silica gel-precoated glass plates. Chromatograms were visualized by fluorescence quenching with UV light at 254 nm. Flash column chromatography was performed using Qingdao Haiyang flash silica gel (200–300 mesh). Infrared spectra were recorded using a Bruker Optics TENSOR 27 instrument. <sup>1</sup>H and <sup>13</sup>C NMR spectra were recorded in CDCl<sub>3</sub> or DMSO-*d*<sub>6</sub> using a 300 MHz NMR instrument (referenced internally to Me<sub>4</sub>Si). <sup>1</sup>H NMR data are reported as follows: chemical shift, multiplicity (s = singlet; d = doublet; q = quartet; m = multiplet; br = broad), coupling constant (Hz), and integral. Data for <sup>13</sup>C NMR spectra are reported in terms of chemical shift. Optical rotation was obtained on a Perkin-Elmer 343 polarimeter. Accurate mass measurements were performed using an Agilent instrument with the ESI-MS technique. Melting points were determined on a Stuard SMP3 melting point apparatus. X-ray crystallographic data were collected using a MM007HF Saturn724+. HPLC analysis was performed on Agilent 1100 series, UV detection monitored at 254 nm, using a Chiralpak AD-H column or a Chiralpak IC column with hexane and *i*-PrOH as the eluent.

### Typical Procedure for Preparation of Boc-Amino-Substituted Chalcones (1)

The Boc-amino-substituted chalcones were prepared according to the literature procedure.<sup>1</sup> A typical procedure is as follows.

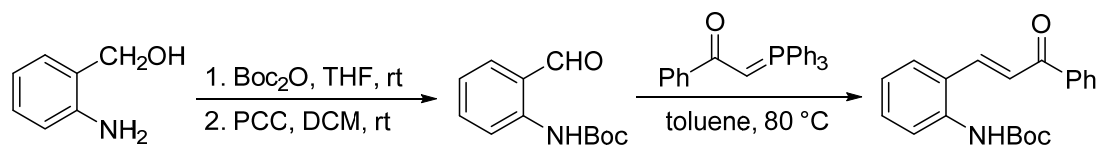

A dry and nitrogen-flushed 100-mL of Schlenk flask, equipped with a magnetic stirring bar and a septum, was charged with a solution of 2-aminobenzyl alcohol (2.46 g, 20 mmol) in dry THF (66 mL).  $(\text{Boc})_2\text{O}$  (4.79 g, 1.1 equiv) was added. The reaction mixture was stirred for 12 h at rt, then the solvent was removed by evaporation in vacuo. The resulting crude product was dissolved in dichloromethane (50 mL) and then PCC (5.173 g, 1.2 equiv) was added. The reaction mixture was stirred for 4 h at rt and then filtered through celite followed by washing with  $\text{CH}_2\text{Cl}_2$ . The resulting solution was concentrated by evaporation in vacuo. The crude product was purified by flash chromatography (ethyl acetate/hexanes: 1/10) to afford Boc-amino-substituted aldehyde (3.54 g, 80% yield).

A dry and nitrogen-flushed 100-mL of Schlenk flask, equipped with a magnetic stirring bar and a septum, was charged with a solution of the above aldehyde (3.23 g, 10 mmol) in toluene (50 mL). The reagent 1-phenyl-2-(triphenylphosphoranylidene)ethanone (4.18 g, 1.1 equiv) was added, and the reaction mixture was stirred for 12 h at 80 °C. Then, the solvent was removed by evaporation in vacuo. The crude product was purified by flash chromatography (ethyl acetate/hexanes: 1/6) to give Boc-amino-substituted chalcone **1a** (2.58 g, 80% yield).

### General Procedure for Chiral Phosphine-Catalyzed Asymmetric [3 + 2] Annulation of Boc-Amino-Substituted with Allenates:

Under a nitrogen atmosphere, to a stirred solution of 2-tert-butoxycarbonyl amino chalcones **1** (0.05 mmol, 1.0 equiv) in  $\text{CH}_2\text{Cl}_2$  (1 mL) was sequentially added 2,3-butadienoate **2** (0.075 mmol, 1.5 equiv) and the catalyst **P5** (0.01 mmol, 20 mol %) via syringes. Then the reaction solution was vigorously stirred at 0 °C, and monitored by TLC. After the reaction was complete, the mixture was directly purified by column chromatography on silica gel (11% EtOAc / petroleum ether as the eluent) to furnish the corresponding product **3**.

### A Typical Procedure for Epoxidation of the Product:

Under a nitrogen atmosphere, a mixture of **7** (65.3 mg, 0.15 mmol) and MCPBA (129.5 mg, 0.75 mmol, 5 equiv) in 2 mL of DCE was stirred for 12 h at room temperature, then the solution was concentrated. The residue was purified by flash column (petroleum ether/EtOAc) to afford the product **8** as yellow liquid (60.2 mg, 89% yield).

<sup>1</sup> (a) Y. T. Lee, Y. J. Jang, S. Syu, S. C. Chou, C. J. Lee and W. W. Lin, *Chem. Commun.*, 2012, **48**, 8135; (b) S. Thielges, E. Meddah, P. Bisseret and J. Eustache, *Tetrahedron Lett.*, 2004, **45**, 907.

### Characterization Data of the Products 3

#### Ethyl (4S,5S)-5-benzoyl-4-(2-((tert-butoxycarbonyl)amino)phenyl)cyclopent-1-ene-1-carboxylate (3aa)

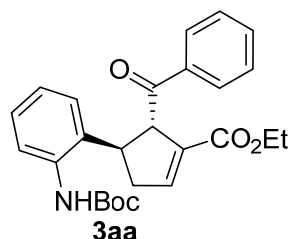

White semi-solid, 92%yield;  $[\alpha]_D^{20} = -35.8$  (*c* 0.61, CH<sub>2</sub>Cl<sub>2</sub>); <sup>1</sup>H NMR (300 MHz, CDCl<sub>3</sub>) δ 7.83 – 7.73 (m, 2H), 7.60 – 7.46 (m, 2H), 7.41 – 7.26 (m, 3H), 7.25 – 7.07 (m, 3H), 6.02 (s, 1H), 4.98 – 4.79 (m, 1H), 4.11 (dd, *J* = 7.1, 1.8 Hz, 2H), 3.85 – 3.71 (m, 1H), 3.40 – 3.15 (m, 1H), 2.75 – 2.62 (m, 1H), 1.38 (s, 9H), 1.14 (t, *J* = 7.1 Hz, 3H); <sup>13</sup>C NMR (75 MHz, CDCl<sub>3</sub>) δ 199.6, 163.5, 153.2, 145.0, 138.0, 135.7, 135.3, 134.7, 131.5, 129.8, 127.5, 127.0, 126.7, 125.7, 124.5, 122.6, 80.2, 60.4, 59.6, 42.9, 41.3, 27.9, 13.8; IR (film)  $\nu_{\max}$  3345, 2979, 2934, 1715, 1639, 1587, 1515, 1449, 1392, 1368, 1332, 1270, 1244, 1160, 1100, 1048, 1024, 848, 751, 698 cm<sup>-1</sup>; HRMS (ESI) calcd for C<sub>26</sub>H<sub>29</sub>NNaO<sub>5</sub><sup>+</sup> [M + Na]<sup>+</sup> 458.1938, found 458.1934; HPLC analysis: 94% ee (CHIRALPAK OD-H, 90:10 isopropanol:hexane, 1.0 mL/min, UV: 254 nm), *t<sub>R</sub>* = 6.68 min (minor), 12.16 min (major).

#### Methyl (4S,5S)-5-benzoyl-4-(2-((tert-butoxycarbonyl)amino)phenyl)cyclopent-1-ene-1-carboxylate (3ab)

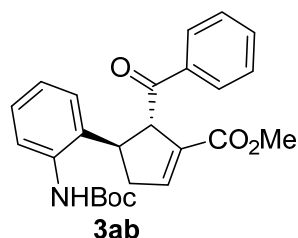

White semi-solid, 75%yield;  $[\alpha]_D^{20} = -68.6$  (*c* 0.8, CH<sub>2</sub>Cl<sub>2</sub>); <sup>1</sup>H NMR (300 MHz, CDCl<sub>3</sub>) δ 7.77 (m, 2H), 7.61 – 7.47 (m, 2H), 7.42 – 7.31 (m, 2H), 7.31 – 7.21 (m, 2H), 7.15 (m, 1H), 7.10 (m, 1H), 5.95 (s, 1H), 4.98 – 4.77 (m, 1H), 3.88 – 3.69 (m, 1H), 3.68 (s, 3H), 3.24 (ddt, *J* = 19.2, 9.3, 2.6 Hz, 1H), 2.75 – 2.56 (m, 1H), 1.38 (s, 9H); <sup>13</sup>C NMR (75 MHz, CDCl<sub>3</sub>) δ 200.5, 164.1, 153.2, 145.0, 136.7, 136.1, 135.2, 134.7, 133.1, 128.5, 128.4, 127.4, 126.7, 125.5, 124.3, 80.2, 59.5, 51.4, 42.6, 41.4, 28.0; IR (film)  $\nu_{\max}$  3346, 2977, 2928, 1717, 1641, 1587, 1515, 1449, 1392, 1367, 1343, 1245, 1160, 1102, 1049, 1021, 913, 847, 803, 749, 696, 671 cm<sup>-1</sup>; HRMS (ESI) calcd for C<sub>26</sub>H<sub>29</sub>NNaO<sub>5</sub><sup>+</sup> [M + Na]<sup>+</sup> 458.1938, found 458.1934; HPLC analysis: 92% ee (CHIRALPAK OD-H, 95:5 isopropanol:hexane, 1.0 mL/min, UV: 254 nm), *t<sub>R</sub>* = 15.2 min (minor), 35.4 min (major).

**Cyclohexyl (4S,5S)-5-benzoyl-4-(2-((tert-butoxycarbonyl)amino)phenyl)cyclopent-1-ene-1-carboxylate (3ac)**

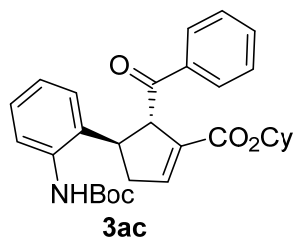

White semi-solid, 95%yield;  $[\alpha]_D^{20} = -57.8$  (*c* 0.315, CH<sub>2</sub>Cl<sub>2</sub>); <sup>1</sup>H NMR (300 MHz, CDCl<sub>3</sub>) δ 7.80 – 7.73 (m, 2H), 7.60 – 7.45 (m, 2H), 7.39 – 7.27 (m, 3H), 7.27 – 7.05 (m, 3H), 6.01 (s, 1H), 5.04 – 4.81 (m, 1H), 4.74 (dt, *J* = 8.4, 4.4 Hz, 1H), 3.75 (m, *J* = 10.1, 1H), 3.22 (m, 9.2, 1H), 2.81 – 2.38 (m, 1H), 1.77 (s, 1H), 1.75 – 1.41 (m, 5H), 1.37 (s, 9H), 1.34 – 1.17 (m, 5H); <sup>13</sup>C NMR (75 MHz, CDCl<sub>3</sub>) δ 201.0, 163.2, 153.3, 144.7, 136.6, 136.5, 136.2, 134.9, 133.1, 128.6, 128.5, 127.5, 126.9, 125.5, 124.3, 80.3, 72.8, 59.4, 43.0, 41.3, 31.4, 31.2, 28.1, 25.2, 23.42, 23.37; IR (film)  $\nu_{\max}$  3343, 3062, 2937, 2860, 1712, 1642, 1587, 1515, 1449, 1392, 1367, 1239, 1160, 1104, 1048, 1015, 948, 909, 850, 751, 699, 671 cm<sup>-1</sup>; HRMS (ESI) calcd for C<sub>30</sub>H<sub>35</sub>NNaO<sub>5</sub><sup>+</sup> [M + Na]<sup>+</sup> 512.2407, found 512.2403; HPLC analysis: 98%ee (CHIRALPAK AD-H, 90:10 isopropanol:hexane, 1.0 mL/min, UV: 254 nm), *t<sub>R</sub>* = 12.3 min (major), 22.2 min (minor).

**Cyclohexyl (4S,5S)-4-(2-((tert-butoxycarbonyl)amino)phenyl)-5-(4-methoxybenzoyl)cyclopent-1-ene-1-carboxylate (3bc)**

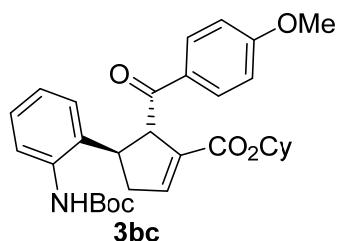

White semi-solid, 97%yield;  $[\alpha]_D^{20} = -69.7$  (*c* 0.81, CH<sub>2</sub>Cl<sub>2</sub>); <sup>1</sup>H NMR (300 MHz, CDCl<sub>3</sub>) δ 7.83 – 7.74 (m, 2H), 7.62 (d, *J* = 8.1 Hz, 1H), 7.31 (dd, *J* = 7.6, 1.6 Hz, 1H), 7.24 (dd, *J* = 7.8, 1.7 Hz, 1H), 7.20 – 7.12 (m, 1H), 7.10 (dd, *J* = 4.0, 2.4 Hz, 1H), 6.88 – 6.80 (m, 2H), 6.05 (s, 1H), 4.88 – 4.70 (m, 2H), 3.83 (s, 3H), 3.79 – 3.69 (m, 1H), 3.24 (ddt, *J* = 19.0, 9.3, 2.6 Hz, 1H), 2.75 – 2.61 (m, 1H), 1.85 – 1.68 (m, 2H), 1.66 – 1.46 (m, 3H), 1.40 (s, 9H), 1.35 – 1.21 (m, 6H); <sup>13</sup>C NMR (75 MHz, CDCl<sub>3</sub>) δ 199.2, 163.4, 163.1, 153.1, 144.3, 136.3, 136.2, 134.7, 130.8, 129.2, 127.3, 126.7, 125.2, 123.8, 113.5, 80.1, 72.6, 58.9, 55.2, 42.9, 41.1, 31.2, 31.1, 28.0, 25.1, 23.23, 23.18; IR (film)  $\nu_{\max}$  3344, 2937, 2859, 1711, 1641, 1586, 1514, 1488, 1451, 1392, 1367, 1257, 1161, 1104, 1021, 948, 906, 795, 753, 681 cm<sup>-1</sup>; HRMS (ESI) calcd for C<sub>31</sub>H<sub>37</sub>NNaO<sub>6</sub><sup>+</sup> [M + Na]<sup>+</sup> 542.2513, found 542.2508; HPLC analysis: 98% ee (CHIRALPAK OD-H, 90:10 isopropanol:hexane, 1.0 mL/min, UV: 254 nm), *t<sub>R</sub>* = 8.7 min (minor), 16.3 min (major).

**Cyclohexyl (4S,5S)-5-([1,1'-biphenyl]-4-carbonyl)-4-(2-((tert-butoxycarbonyl)amino)phenyl)-cyclopent-1-ene-1-carboxylate (3cc)**

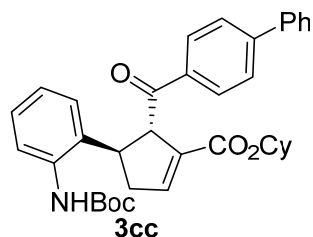

White semi-solid, 98%yield;  $[\alpha]_D^{20} = -67.1$  (*c* 1.175, CH<sub>2</sub>Cl<sub>2</sub>); <sup>1</sup>H NMR (300 MHz, CDCl<sub>3</sub>) δ 7.92 – 7.84 (m, 2H), 7.66 – 7.57 (m, 5H), 7.51 – 7.43 (m, 2H), 7.43 – 7.32 (m, 2H), 7.32 – 7.22 (m, 1H), 7.23 – 7.16 (m, 1H), 7.16 – 7.10 (m, 1H), 6.08 (s, 1H), 4.99 – 4.89 (m, 1H), 4.86 – 4.72 (m, 1H), 3.89 – 3.77 (m, 1H), 3.28 (ddt, *J* = 19.0, 9.3, 2.6 Hz, 1H), 2.80 – 2.63 (m, 1H), 1.83 – 1.69 (m, 2H), 1.66 – 1.54 (m, 2H), 1.52 – 1.43 (m, 2H), 1.38 (s, 9H), 1.36 – 1.25 (m, 4H), 1.20 (m, *J* = 13.7, 5.7 Hz, 1H); <sup>13</sup>C NMR (75 MHz, CDCl<sub>3</sub>) δ 200.5, 163.0, 153.2, 145.6, 144.5, 139.6, 136.5, 136.2, 135.0, 134.8, 129.1, 128.7, 128.0, 127.4, 127.0, 126.9, 126.8, 125.4, 124.1, 80.1, 72.7, 59.3, 43.0, 41.2, 31.2, 31.1, 27.9, 25.1, 23.3, 23.2; IR (film)  $\nu_{\max}$  3342, 2964, 2937, 2860, 1711, 1680, 1603, 1560, 1515, 1450, 1406, 1367, 1261, 1159, 1097, 1022, 800, 755, 698 cm<sup>-1</sup>; HRMS (ESI) calcd for C<sub>36</sub>H<sub>39</sub>ClNNaO<sub>5</sub><sup>+</sup> [*M* + Na]<sup>+</sup> 588.2720, found 588.2718; HPLC analysis: 97% ee (CHIRALPAK OD-H, 90:10 isopropanol:hexane, 1.0 mL/min, UV: 254 nm), *t*<sub>R</sub> = 6.8 min (minor), 13.8 min (major).

**Cyclohexyl (4S,5S)-5-(3-bromobenzoyl)-4-(2-((tert-butoxycarbonyl)amino)phenyl)cyclopent-1-ene-1-carboxylate (3dc)**

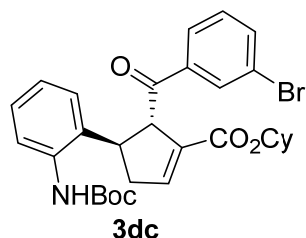

Pale yellow semi-solid, 93%yield;  $[\alpha]_D^{20} = -114.3$  (*c* 0.965, CH<sub>2</sub>Cl<sub>2</sub>); <sup>1</sup>H NMR (300 MHz, CDCl<sub>3</sub>) δ 7.98 – 7.85 (m, 1H), 7.85 – 7.76 (m, 2H), 7.60 – 7.48 (m, 1H), 7.44 – 7.35 (m, 2H), 7.30 – 7.22 (m, 1H), 7.19 – 7.13 (m, 1H), 7.12 – 7.03 (m, 1H), 6.12 (s, 1H), 4.93 – 4.79 (m, 1H), 4.80 – 4.68 (m, 1H), 3.70 (dt, *J* = 9.9, 5.1 Hz, 1H), 3.24 (ddt, *J* = 19.0, 9.2, 2.6 Hz, 1H), 2.78 – 2.47 (m, 1H), 1.80 – 1.68 (m, 2H), 1.64 – 1.45 (m, 3H), 1.40 (s, 9H), 1.35 – 1.18 (m, 5H); <sup>13</sup>C NMR (75 MHz, CDCl<sub>3</sub>) δ 200.6, 162.8, 152.8, 144.2, 138.1, 136.2, 136.0, 133.9, 133.2, 130.4, 129.6, 128.5, 128.4, 125.3, 118.1, 80.5, 72.9, 59.0, 42.6, 40.9, 31.2, 31.0, 27.9, 25.0, 23.29, 23.24; IR (film)  $\nu_{\max}$  3345, 3065, 2936, 2859, 1708, 1639, 1588, 1566, 1514, 1451, 1421, 1367, 1245, 1212, 1160, 1104, 1047, 1019, 947, 907, 752, 701, 671 cm<sup>-1</sup>; HRMS (ESI) calcd for C<sub>30</sub>H<sub>34</sub>BrNNaO<sub>5</sub><sup>+</sup> [*M* + Na]<sup>+</sup> 590.1513, found 590.1510. HPLC analysis: 96%ee (CHIRALPAK AD-H, 90:10 isopropanol:hexane, 1.0 mL/min, UV: 254 nm), *t*<sub>R</sub> = 11.8 min (major), 25.2 min (minor).

**Cyclohexyl (4S,5S)-5-(4-bromobenzoyl)-4-(2-((tert-butoxycarbonyl)amino)phenyl)cyclopent-1-ene-1-carboxylate (3ec)**

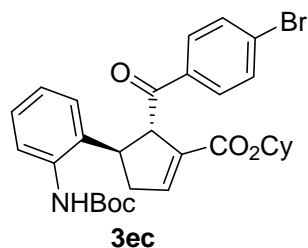

Pale yellow semi-solid, 96%yield;  $[\alpha]_D^{20} = -61.6$  (*c* 1.025, CH<sub>2</sub>Cl<sub>2</sub>); <sup>1</sup>H NMR (300 MHz, CDCl<sub>3</sub>)  $\delta$  7.71 – 7.60 (m, 2H), 7.60 – 7.45 (m, 3H), 7.35 – 7.22 (m, 2H), 7.21 – 7.13 (m, 1H), 7.13 – 7.05 (m, 1H), 6.06 (s, 1H), 4.88 – 4.69 (m, 1H), 3.83 – 3.72 (m, 1H), 3.24 (ddd, *J* = 11.7, 9.2, 4.6 Hz, 1H), 2.77 – 2.61 (m, 1H), 1.86 – 1.70 (m, 2H), 1.67 – 1.44 (m, 4H), 1.39 (s, 9H), 1.36 – 1.16 (m, 5H); <sup>13</sup>C NMR (75 MHz, CDCl<sub>3</sub>)  $\delta$  200.0, 162.9, 153.2, 144.6, 136.6, 135.9, 135.0, 134.6, 131.6, 130.0, 128.2, 127.5, 126.7, 125.6, 124.3, 80.2, 72.8, 59.3, 42.9, 41.2, 31.2, 31.1, 28.0, 25.0, 23.29, 23.25; IR (film)  $\nu_{\max}$  3344, 2937, 2859, 1711, 1641, 1586, 1514, 1488, 1451, 1392, 1367, 1257, 1161, 1104, 1021, 948, 906, 795, 753, 681 cm<sup>-1</sup>; HRMS (ESI) calcd for C<sub>30</sub>H<sub>34</sub>BrNNaO<sub>5</sub><sup>+</sup> [*M* + Na]<sup>+</sup> 590.1513, found 590.1509; HPLC analysis: 95% ee (CHIRALPAK OD-H, 90:10 isopropanol:hexane, 1.0 mL/min, UV: 254 nm), *t<sub>R</sub>* = 6.86 min (minor), 12.7 min (major).

**Cyclohexyl (4S,5S)-4-(2-((tert-butoxycarbonyl)amino)phenyl)-5-(4-(trifluoromethyl)benzoyl)cyclopent-1-ene-1-carboxylate (3fc)**

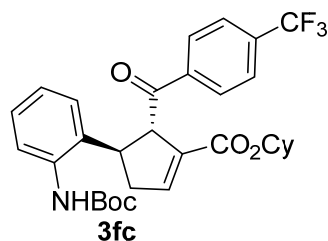

White semi-solid, 92%yield;  $[\alpha]_D^{20} = -73.5$  (*c* 0.96, CH<sub>2</sub>Cl<sub>2</sub>); <sup>1</sup>H NMR (300 MHz, CDCl<sub>3</sub>)  $\delta$  7.89 (d, *J* = 8.1 Hz, 2H), 7.64 (m, 2H), 7.54 (m, 1H), 7.37 – 7.29 (m, 1H), 7.29 – 7.24 (m, 1H), 7.20 (m, 1H), 7.15 – 7.09 (m, 1H), 6.04 (s, 1H), 4.94 – 4.83 (m, 1H), 4.82 – 4.67 (m, 1H), 3.92 – 3.75 (m, 1H), 3.28 (ddt, *J* = 19.1, 9.2, 2.6 Hz, 1H), 2.81 – 2.65 (m, 1H), 1.82 – 1.70 (m, 1H), 1.68 – 1.55 (m, 3H), 1.55 – 1.41 (m, 2H), 1.37 (s, 9H), 1.34 – 1.19 (m, 5H); <sup>13</sup>C NMR (75 MHz, CDCl<sub>3</sub>)  $\delta$  200.4, 162.9, 153.2, 144.8, 139.2, 136.8, 135.9, 134.6, 128.8, 127.6, 126.7, 125.8, 125.33, 125.28, 124.6, 80.3, 72.9, 59.6, 42.9, 41.3, 31.2, 31.1, 27.9, 25.0, 23.31, 23.27; IR (film)  $\nu_{\max}$  3345, 2938, 2861, 1703, 1639, 1586, 1512, 1451, 1410, 1367, 1323, 1261, 1166, 1131, 1112, 1067, 1014, 853, 801, 750, 702, 596 cm<sup>-1</sup> HRMS (ESI) calcd for C<sub>31</sub>H<sub>34</sub>F<sub>3</sub>NNaO<sub>5</sub><sup>+</sup> [*M* + Na]<sup>+</sup> 580.2281, found 580.2282; HPLC analysis: 97% ee (CHIRALPAK OD-H, 90:10 isopropanol:hexane, 1.0 mL/min, UV: 254 nm), *t<sub>R</sub>* = 5.7 min (minor), 10.2 min (major).

**Cyclohexyl (4S,5S)-5-([1,1'-biphenyl]-4-carbonyl)-4-(2-((tert-butoxycarbonyl)amino)-3-methylphenyl)cyclopent-1-ene-1-carboxylate (3gc)**

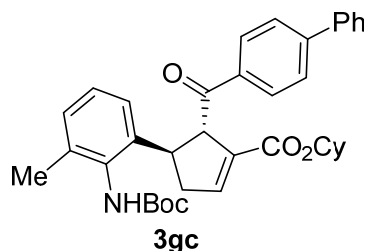

White semi-solid, 96% yield;  $[\alpha]_D^{20} = -87.7$  ( $c$  0.97,  $\text{CH}_2\text{Cl}_2$ );  $^1\text{H NMR}$  (300 MHz,  $\text{CDCl}_3$ )  $\delta$  7.94 – 7.84 (m, 2H), 7.67 – 7.55 (m, 4H), 7.52 – 7.34 (m, 4H), 7.19 – 7.11 (m, 2H), 7.11 – 7.03 (m, 1H), 5.92 (s, 1H), 4.91 (d,  $J = 2.5$  Hz, 1H), 4.86 – 4.73 (m, 1H), 3.87 – 3.68 (m, 1H), 3.26 (ddt,  $J = 19.1, 9.3, 2.7$  Hz, 1H), 2.81 – 2.64 (m, 1H), 2.35 (s, 3H), 1.86 – 1.67 (m, 2H), 1.68 – 1.41 (m, 4H), 1.36 (s, 9H), 1.34 – 0.95 (m, 5H);  $^{13}\text{C NMR}$  (75 MHz,  $\text{CDCl}_3$ )  $\delta$  200.5, 163.2, 153.5, 145.5, 144.6, 139.6, 136.1, 135.4, 135.1, 132.0, 129.1, 128.7, 128.1, 127.9, 127.1, 127.0, 126.9, 124.7, 79.9, 72.7, 59.5, 42.8, 41.4, 31.2, 31.1, 27.9, 25.1, 23.3, 23.2, 20.9; IR (film)  $\nu_{\text{max}}$  2938, 2861, 1709, 1603, 1515, 1486, 1450, 1406, 1366, 1262, 1161, 1101, 1007, 810, 758, 698  $\text{cm}^{-1}$ ; HRMS (ESI) calcd for  $\text{C}_{37}\text{H}_{41}\text{NNaO}_5^+$  [ $\text{M} + \text{Na}$ ] $^+$  602.2877, found 602.2873; HPLC analysis: 97% ee (CHIRALPAK RC-OD-H, 90:10 isopropanol:hexane, 1.0 mL/min, UV: 254 nm),  $t_R = 6.5$  min (minor), 11.9 min (major).

**Cyclohexyl (4S,5S)-4-(2-((tert-butoxycarbonyl)amino)-3-methylphenyl)-5-(4-methoxybenzoyl)cyclopent-1-ene-1-carboxylate (3hc)**

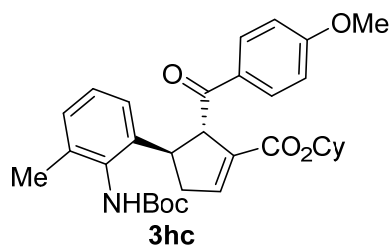

White semi-solid, 94% yield;  $[\alpha]_D^{20} = -86.3$  ( $c$  1.05,  $\text{CH}_2\text{Cl}_2$ );  $^1\text{H NMR}$  (300 MHz,  $\text{CDCl}_3$ )  $\delta$  7.76 (d,  $J = 8.5$  Hz, 2H), 7.26 – 7.17 (m, 2H), 7.17 – 7.09 (m, 1H), 7.08 – 7.00 (m, 1H), 6.88 – 6.75 (m, 2H), 5.60 (s, 1H), 4.85 (s, 1H), 4.81 – 4.69 (m, 1H), 3.97 – 3.83 (m, 1H), 3.81 (s, 3H), 3.20 (ddt,  $J = 19.1, 9.3, 2.5$  Hz, 1H), 2.61 (d,  $J = 19.1$  Hz, 1H), 2.22 (s, 3H), 1.87 – 1.67 (m, 1H), 1.65 – 1.50 (m, 2H), 1.37 (s, 9H), 1.32 – 1.06 (m, 6H), 0.95 – 0.74 (m, 2H);  $^{13}\text{C NMR}$  (75 MHz,  $\text{CDCl}_3$ )  $\delta$  199.5, 163.5, 163.4, 153.9, 144.7, 143.3, 136.8, 136.2, 132.9, 131.0, 129.6, 129.0, 128.0, 124.3, 113.5, 79.9, 72.6, 59.4, 55.3, 43.5, 42.1, 31.4, 31.2, 28.1, 25.3, 23.41, 23.37, 18.4; IR (film)  $\nu_{\text{max}}$  3331, 2937, 2860, 1710, 1674, 1600, 1576, 1510, 1454, 1421, 1366, 1262, 1170, 1103, 1017, 911, 862, 842, 783, 738, 615, 514  $\text{cm}^{-1}$ ; HRMS (ESI) calcd for  $\text{C}_{32}\text{H}_{39}\text{NNaO}_6^+$  [ $\text{M} + \text{Na}$ ] $^+$  556.2670, found 556.2669; HPLC analysis: 97% ee (CHIRALPAK AD-H, 90:10 isopropanol:hexane, 1.0 mL/min, UV: 254 nm),  $t_R = 13.4$  min (major), 20.3 min (minor).



**Cyclohexyl (4S,5S)-5-(4-bromobenzoyl)-4-(2-((tert-butoxycarbonyl)amino)-3-methylphenyl)cyclopent-1-ene-1-carboxylate (3ic)**

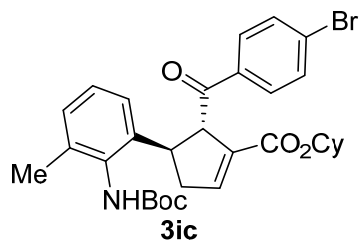

White semi-solid, 94%yield;  $[\alpha]_D^{20} = -73.6$  ( $c$  0.83,  $\text{CH}_2\text{Cl}_2$ );  $^1\text{H}$  NMR (300 MHz,  $\text{CDCl}_3$ )  $\delta$  7.70 – 7.59 (m, 2H), 7.55 – 7.43 (m, 2H), 7.23 – 7.18 (m, 2H), 7.18 – 7.09 (m, 1H), 5.62 (s, 1H), 4.84 (s, 1H), 4.79 – 4.66 (m, 1H), 3.98 – 3.80 (m, 1H), 3.21 (ddt,  $J = 19.1, 9.2, 2.5$  Hz, 1H), 2.61 (d,  $J = 19.2$  Hz, 1H), 2.22 (s, 3H), 1.83 – 1.67 (m, 3H), 1.66 – 1.52 (m, 2H), 1.51 – 1.40 (m, 2H), 1.35 (s, 9H), 1.29 – 1.07 (m, 4H);  $^{13}\text{C}$  NMR (75 MHz,  $\text{CDCl}_3$ )  $\delta$  200.4, 163.3, 153.9, 145.1, 143.0, 136.7, 136.0, 135.4, 132.9, 131.6, 130.3, 129.2, 128.1, 128.0, 124.3, 80.0, 59.6, 43.5, 42.2, 31.4, 31.3, 28.0, 25.2, 23.5, 23.4, 18.4; IR (film)  $\nu_{\text{max}}$  3336, 2979, 2931, 1716, 1641, 1596, 1580, 1495, 1448, 1392, 1368, 1333, 1245, 1219, 1165, 1102, 1052, 1024, 912, 843, 780, 749, 694  $\text{cm}^{-1}$ ; HRMS (ESI) calcd for  $\text{C}_{31}\text{H}_{36}\text{BrNNaO}_5^+$   $[\text{M} + \text{Na}]^+$  604.1669, found 604.1666; HPLC analysis: 97% ee (CHIRALPAK AD-H, 95:5 isopropanol:hexane, 1.0 mL/min, UV: 254 nm),  $t_R = 9.7$  min (minor), 11.7 min (major).

**Cyclohexyl (4S,5S)-5-([1,1'-biphenyl]-4-carbonyl)-4-(2-((tert-butoxycarbonyl)amino)-5-methylphenyl)cyclopent-1-ene-1-carboxylate (3jc)**

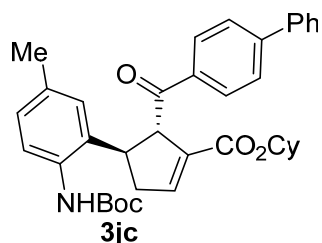

White semi-solid, 85%yield;  $[\alpha]_D^{20} = -93.7$  ( $c$  0.97,  $\text{CH}_2\text{Cl}_2$ );  $^1\text{H}$  NMR (300 MHz,  $\text{CDCl}_3$ )  $\delta$  7.94 – 7.84 (m, 2H), 7.67 – 7.55 (m, 4H), 7.52 – 7.34 (m, 4H), 7.19 – 7.11 (m, 2H), 7.11 – 7.03 (m, 1H), 5.92 (s, 1H), 4.91 (d,  $J = 2.5$  Hz, 1H), 4.86 – 4.73 (m, 1H), 3.87 – 3.68 (m, 1H), 3.26 (ddt,  $J = 19.1, 9.3, 2.7$  Hz, 1H), 2.81 – 2.64 (m, 1H), 2.35 (s, 3H), 1.86 – 1.67 (m, 2H), 1.68 – 1.41 (m, 4H), 1.36 (s, 9H), 1.34 – 0.95 (m, 5H);  $^{13}\text{C}$  NMR (75 MHz,  $\text{CDCl}_3$ )  $\delta$  200.5, 163.2, 153.5, 145.5, 144.6, 139.6, 136.1, 135.4, 135.1, 132.0, 129.1, 128.7, 128.1, 127.9, 127.1, 127.0, 126.9, 124.7, 79.9, 72.7, 59.5, 42.8, 41.4, 31.2, 31.1, 27.9, 25.1, 23.3, 23.2, 20.9; IR (film)  $\nu_{\text{max}}$  2938, 2861, 1709, 1603, 1515, 1486, 1450, 1406, 1366, 1262, 1161, 1101, 1007, 810, 758, 698  $\text{cm}^{-1}$ ; HRMS (ESI) calcd for  $\text{C}_{37}\text{H}_{41}\text{NNaO}_5^+$   $[\text{M} + \text{Na}]^+$  602.2877, found 602.2873; HPLC analysis: 96% ee (CHIRALPAK RC-OD-H, 90:10 isopropanol:hexane, 1.0 mL/min, UV: 254 nm),  $t_R = 6.5$  min (minor), 11.9 min (major).

**Cyclohexyl (4S,5S)-5-(4-bromobenzoyl)-4-(2-((tert-butoxycarbonyl)amino)-5-methylphenyl)cyclopent-1-ene-1-carboxylate (3kc)**

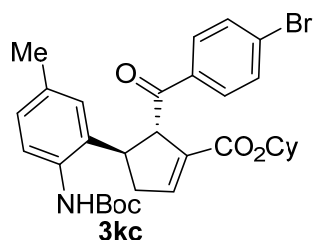

White semi-solid, 92%yield;  $[\alpha]_D^{20} = -73.6$  (*c* 0.83, CH<sub>2</sub>Cl<sub>2</sub>); <sup>1</sup>H NMR (300 MHz, CDCl<sub>3</sub>) δ 7.70 – 7.59 (m, 2H), 7.56 – 7.45 (m, 2H), 7.37 (d, *J* = 8.1 Hz, 1H), 7.09 (dd, *J* = 11.7, 4.9 Hz, 3H), 5.89 (s, 1H), 4.85 – 4.65 (m, 2H), 3.84 – 3.67 (m, 1H), 3.23 (ddt, *J* = 19.2, 9.3, 2.6 Hz, 1H), 2.81 – 2.61 (m, 1H), 2.34 (s, 1H), 1.85 – 1.70 (m, 2H), 1.67 – 1.55 (m, 2H), 1.54 – 1.42 (m, 1H), 1.38 (s, 9H), 1.34 – 1.10 (m, 6H); <sup>13</sup>C NMR (75 MHz, CDCl<sub>3</sub>) δ 200.0, 163.0, 153.5, 144.7, 137.3, 135.8, 135.6, 135.1, 131.9, 131.6, 130.0, 128.2, 127.1, 124.9, 80.0, 72.8, 59.5, 42.7, 41.4, 31.2, 31.1, 28.0, 25.1, 23.29, 23.26, 20.8; IR (film)  $\nu_{\max}$  3336, 2979, 2931, 1716, 1641, 1596, 1580, 1495, 1448, 1392, 1368, 1333, 1245, 1219, 1165, 1102, 1052, 1024, 912, 843, 780, 749, 694 cm<sup>-1</sup>; HRMS (ESI) calcd for C<sub>31</sub>H<sub>36</sub>BrNNaO<sub>5</sub><sup>+</sup> [M + Na]<sup>+</sup> 604.1669, found 604.1666; HPLC analysis: 98%ee (CHIRALPAK RC-OD-H, 90:10 isopropanol:hexane, 1.0 mL/min, UV: 254 nm), *t<sub>R</sub>* = 5.4 min (minor), 9.3 min (major).

**Cyclohexyl (4S,5S)-4-(2-((tert-butoxycarbonyl)amino)-5-methylphenyl)-5-(4-(trifluoromethyl)benzoyl)cyclopent-1-ene-1-carboxylate (3lc)**

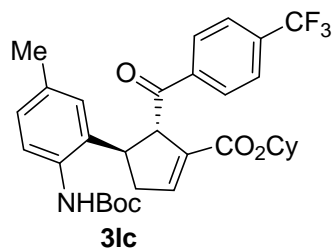

White semi-solid, 80%yield;  $[\alpha]_D^{20} = -95.8$  (*c* 0.48, CH<sub>2</sub>Cl<sub>2</sub>); <sup>1</sup>H NMR (300 MHz, CDCl<sub>3</sub>) δ 7.96 – 7.83 (m, 2H), 7.74 – 7.54 (m, 2H), 7.40 – 7.29 (m, 1H), 7.16 – 6.98 (m, 3H), 5.90 (s, 1H), 4.95 – 4.82 (m, 1H), 4.82 – 4.66 (m, 1H), 3.89 – 3.67 (m, 1H), 3.42 – 3.12 (m, 1H), 2.84 – 2.59 (m, 1H), 2.34 (s, 3H), 1.83 – 1.39 (m, 8H), 1.35 (s, 9H), 1.32 – 1.12 (m, 3H); <sup>13</sup>C NMR (75 MHz, CDCl<sub>3</sub>) δ 200.4, 163.0, 153.5, 144.9, 139.2, 137.6, 135.9, 135.8, 131.9, 128.8, 128.2, 127.1, 125.3, 125.2, 80.1, 72.9, 59.8, 42.8, 41.4, 31.2, 31.1, 27.9, 25.0, 23.30, 23.27, 20.8; IR (film)  $\nu_{\max}$  2940, 2863, 1705, 1514, 1485, 1453, 1410, 1367, 1323, 1246, 1166, 1132, 1067, 1012, 851, 766 cm<sup>-1</sup>; HRMS (ESI) calcd for C<sub>31</sub>H<sub>33</sub>ClF<sub>3</sub>NNaO<sub>5</sub><sup>+</sup> [M + Na]<sup>+</sup> 594.2438, found 594.2434; HPLC analysis: 96%ee (CHIRALPAK RC-OD-H, 90:10 isopropanol:hexane, 1.0 mL/min, UV: 254 nm), *t<sub>R</sub>* = 5.0 min (minor), 8.3 min (major).

**Cyclohexyl (4S,5S)-5-benzoyl-4-(2-((tert-butoxycarbonyl)amino)-5-fluorophenyl)cyclopent-1-ene-1-carboxylate (3mc)**

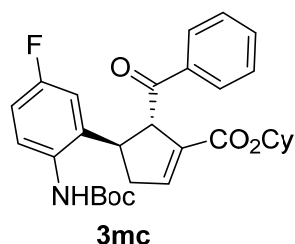

White semi-solid, 93%yield;  $[\alpha]_D^{20} = -78.1$  (*c* 0.91, CH<sub>2</sub>Cl<sub>2</sub>); <sup>1</sup>H NMR (300 MHz, CDCl<sub>3</sub>) δ 7.80 (d, *J* = 7.4 Hz, 2H), 7.59 – 7.48 (m, 1H), 7.48 – 7.32 (m, 3H), 7.14 – 7.00 (m, 2H), 6.99 – 6.86 (m, 1H), 5.89 (s, 1H), 4.91 – 4.80 (m, 1H), 4.79 – 4.63 (m, 1H), 3.90 – 3.67 (m, 1H), 3.34 – 3.15 (m, 1H), 2.75 – 2.58 (m, 1H), 1.86 – 1.66 (m, 2H), 1.65 – 1.46 (m, 4H), 1.36 (s, 9H), 1.33 – 1.05 (m, 5H); <sup>13</sup>C NMR (75 MHz, CDCl<sub>3</sub>) δ 200.6, 162.9, 153.4, 144.3, 136.3, 136.0, 133.0, 130.50, 130.46, 128.42, 128.35, 127.0, 114.3, 114.0, 113.2, 112.9, 80.3, 72.8, 59.2, 42.7, 41.1, 31.2, 31.0, 27.9, 25.0, 23.3, 23.2; IR (film)  $\nu_{\max}$  3338, 3061, 2937, 2860, 1708, 1640, 1614, 1596, 1581, 1510, 1449, 1420, 1392, 1367, 1262, 1218, 1161, 1100, 1051, 10151, 9071, 8601, 844, 810, 734, 697 cm<sup>-1</sup>; HRMS (ESI) calcd for C<sub>30</sub>H<sub>34</sub>FNNaO<sub>5</sub><sup>+</sup> [M + Na]<sup>+</sup> 530.2313, found 530.2315. HPLC analysis: 96% ee (CHIRALPAK OD-H, 90:10 isopropanol:hexane, 1.0 mL/min, UV: 254 nm), *t*<sub>R</sub> = 6.0 min (minor), 10.8 min (major).

**Cyclohexyl (4S,5S)-4-(2-((tert-butoxycarbonyl)amino)-5-fluorophenyl)-5-(4-methoxybenzoyl)cyclopent-1-ene-1-carboxylate (3nc)**

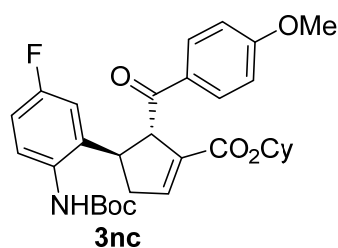

White semi-solid, 98%yield;  $[\alpha]_D^{20} = -78.2$  (*c* 0.715, CH<sub>2</sub>Cl<sub>2</sub>); <sup>1</sup>H NMR (300 MHz, CDCl<sub>3</sub>) δ 7.83 – 7.75 (m, 2H), 7.53 – 7.41 (m, 1H), 7.11 – 6.99 (m, 2H), 6.99 – 6.90 (m, 1H), 6.89 – 6.82 (m, 2H), 5.92 (s, 1H), 4.87 – 4.65 (m, 2H), 3.84 (s, 3H), 3.81 – 3.63 (m, 1H), 3.34 – 3.09 (m, 1H), 2.64 (d, *J* = 19.3 Hz, 1H), 1.84 – 1.67 (m, 3H), 1.65 – 1.52 (m, 2H), 1.51 – 1.42 (m, 1H), 1.38 (s, 9H), 1.34 – 1.14 (m, 5H); <sup>13</sup>C NMR (75 MHz, CDCl<sub>3</sub>) δ 198.9, 163.5, 162.9, 153.4, 144.1, 136.1, 130.8, 130.54, 130.50, 129.2, 126.7, 114.2, 113.9, 113.6, 113.2, 112.9, 80.2, 72.7, 58.8, 55.2, 42.8, 41.1, 31.2, 31.0, 27.9, 25.1, 23.24, 23.20; IR (film)  $\nu_{\max}$  3337, 3062, 2938, 2860, 1712, 1674, 1601, 1576, 1511, 1454, 1420, 1392, 1367, 1320, 1264, 1171, 1104, 1051, 1028, 968, 908, 863, 841, 814, 770, 735, 704, 639, 616, 514 cm<sup>-1</sup>; HRMS (ESI) calcd for C<sub>31</sub>H<sub>36</sub>FNNaO<sub>6</sub><sup>+</sup> [M + Na]<sup>+</sup> 560.2419, found 560.2414; HPLC analysis: 97.4%ee (CHIRALPAK OD-H, 90:10 isopropanol:hexane, 1.0 mL/min, UV: 254 nm), *t*<sub>R</sub> = 7.6 min (minor), 15.3 min (major).

**Cyclohexyl (4S,5S)-5-([1,1'-biphenyl]-4-carbonyl)-4-(2-((tert-butoxycarbonyl)amino)-5-fluorophenyl)cyclopent-1-ene-1-carboxylate (3oc)**

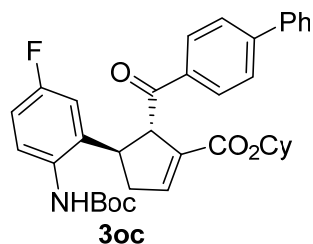

White semi-solid, 69%yield;  $[\alpha]_D^{20} = -52.2$  (*c* 0.68, CH<sub>2</sub>Cl<sub>2</sub>); <sup>1</sup>H NMR (300 MHz, CDCl<sub>3</sub>) δ 7.90 (d, *J* = 8.5 Hz, 2H), 7.68 – 7.56 (m, 4H), 7.52 – 7.36 (m, 4H), 7.15 – 7.04 (m, 2H), 7.00 – 6.91 (m, 1H), 5.92 (s, 1H), 4.89 (d, *J* = 2.6 Hz, 1H), 4.83 – 4.70 (m, 1H), 3.91 – 3.70 (m, 1H), 3.35 – 3.17 (m, 1H), 2.70 (dd, *J* = 11.8, 9.4 Hz, 1H), 1.85 – 1.67 (m, 3H), 1.66 – 1.53 (m, 2H), 1.52 – 1.41 (m, 1H), 1.36 (s, 9H), 1.35 – 1.16 (m, 5H); <sup>13</sup>C NMR (75 MHz, CDCl<sub>3</sub>) δ 200.2, 162.9, 153.5, 145.7, 144.3, 139.5, 136.1, 135.0, 130.54, 130.50, 129.1, 128.7, 128.0, 127.0, 114.3, 114.0, 113.3, 113.0, 80.3, 72.8, 59.2, 42.8, 41.2, 31.2, 31.1, 27.9, 25.1, 23.29, 23.25; IR (film)  $\nu_{\max}$  3338, 2963, 2938, 2860, 1708, 1603, 1560, 1509, 1486, 1450, 1406, 1367, 1261, 1160, 1097, 1015, 862, 800, 760, 739, 698 cm<sup>-1</sup>; HRMS (ESI) calcd for C<sub>36</sub>H<sub>38</sub>FNNaO<sub>5</sub><sup>+</sup> [M + Na]<sup>+</sup> 606.2626, found 606.2630; HPLC analysis: 97.5%ee (CHIRALPAK RC-OD-H, 90:10 isopropanol:hexane, 1.0 mL/min, UV: 254 nm), *t<sub>R</sub>* = 6.2 min (minor), 12.2 min (major).

**Cyclohexyl (4S,5S)-5-benzoyl-4-(2-((tert-butoxycarbonyl)amino)-4-chlorophenyl)cyclopent-1-ene-1-carboxylate (3pc)**

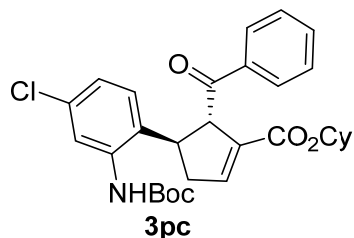

White semi-solid, 81%yield;  $[\alpha]_D^{20} = -124.5$  (*c* 0.615, CH<sub>2</sub>Cl<sub>2</sub>); <sup>1</sup>H NMR (300 MHz, CDCl<sub>3</sub>) δ 7.84 – 7.75 (m, 3H), 7.60 – 7.49 (m, 1H), 7.45 – 7.36 (m, 2H), 7.25 – 7.18 (m, 1H), 7.14 – 7.06 (m, 2H), 6.14 (s, 1H), 4.91 – 4.80 (m, 1H), 4.80 – 4.65 (m, 1H), 3.79 – 3.60 (m, 1H), 3.23 (ddt, *J* = 19.1, 9.2, 2.6 Hz, 1H), 2.78 – 2.59 (m, 1H), 1.82 – 1.67 (m, 2H), 1.64 – 1.52 (m, 2H), 1.51 – 1.43 (m, 1H), 1.40 (s, 9H), 1.34 – 1.20 (m, 5H), 1.19 – 1.09 (m, 1H); <sup>13</sup>C NMR (75 MHz, CDCl<sub>3</sub>) δ 200.6, 162.8, 152.9, 144.2, 136.2, 136.0, 133.4, 133.1, 130.4, 128.5, 128.4, 127.4, 126.6, 80.5, 72.8, 59.1, 42.6, 40.9, 31.2, 31.0, 27.9, 25.0, 23.3, 23.2; IR (film)  $\nu_{\max}$  3336, 2937, 2860, 1709, 1597, 1579, 1512, 1449, 1414, 1367, 1274, 1235, 1158, 1103, 1013, 930, 859, 812, 749, 700 cm<sup>-1</sup>; HRMS (ESI) calcd for C<sub>30</sub>H<sub>34</sub>ClNNaO<sub>5</sub><sup>+</sup> [M + Na]<sup>+</sup> 546.2018, found 546.2016; HPLC analysis: 97%ee (chiralpak OD-H, 95:5 isopropanol:hexane, 1.0 mL/min, UV: 254 nm), *t<sub>R</sub>* = 8.2 min (major), 18.7 min (minor).

**Cyclohexyl (4S,5S)-5-benzoyl-4-(2-((tert-butoxycarbonyl)amino)-5-chlorophenyl)cyclopent-1-ene-1-carboxylate (3qc)**

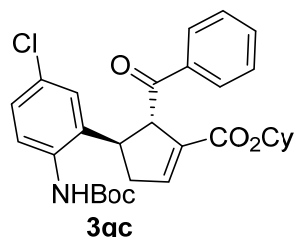

White semi-solid, 92%yield;  $[\alpha]_D^{20} = -135.8$  (*c* 0.83, CH<sub>2</sub>Cl<sub>2</sub>); <sup>1</sup>H NMR (300 MHz, CDCl<sub>3</sub>) δ 7.84 – 7.75 (m, 3H), 7.60 – 7.49 (m, 1H), 7.45 – 7.36 (m, 3H), 7.25 – 7.18 (m, 1H), 7.14 – 7.06 (m, 2H), 6.14 (s, 1H), 4.91 – 4.80 (m, 1H), 4.80 – 4.65 (m, 1H), 3.79 – 3.60 (m, 1H), 3.23 (ddt, *J* = 19.1, 9.2, 2.6 Hz, 1H), 2.78 – 2.59 (m, 1H), 1.82 – 1.67 (m, 2H), 1.64 – 1.52 (m, 2H), 1.51 – 1.43 (m, 1H), 1.40 (s, 9H), 1.34 – 1.20 (m, 5H), 1.19 – 1.09 (m, 1H); <sup>13</sup>C NMR (75 MHz, CDCl<sub>3</sub>) δ 200.6, 162.8, 152.9, 144.2, 136.2, 136.0, 133.4, 133.1, 130.4, 128.5, 128.4, 127.4, 126.6, 80.5, 72.8, 59.1, 42.6, 40.9, 31.2, 31.0, 27.9, 25.0, 23.3, 23.2; IR (film)  $\nu_{\max}$  3337, 2937, 2860, 1708, 1595, 1577, 1510, 1449, 1410, 1367, 1275, 1235, 1157, 1104, 1013, 927, 854, 809, 748 cm<sup>-1</sup>; HRMS (ESI) calcd for C<sub>30</sub>H<sub>34</sub>ClNNaO<sub>5</sub><sup>+</sup> [M + Na]<sup>+</sup> 546.2018, found 546.2016; HPLC analysis: 97%ee (chiralpak OD-H, 95:5 isopropanol:hexane, 1.0 mL/min, UV: 254 nm), *t<sub>R</sub>* = 8.2 min (major), 18.7 min (minor).

**Cyclohexyl (4S,5S)-5-(4-bromobenzoyl)-4-(2-((tert-butoxycarbonyl)amino)-5-chlorophenyl)cyclopent-1-ene-1-carboxylate (3rc)**

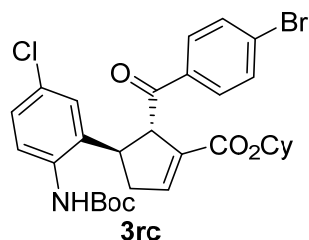

White semi-solid, 87%yield;  $[\alpha]_D^{20} = -126.0$  (*c* 0.635, CH<sub>2</sub>Cl<sub>2</sub>); <sup>1</sup>H NMR (300 MHz, CDCl<sub>3</sub>) δ 7.71 – 7.64 (m, 2H), 7.57 – 7.50 (m, 2H), 7.46 – 7.36 (m, 1H), 7.12 – 7.07 (m, 1H), 7.06 – 7.00 (m, 1H), 6.99 – 6.90 (m, 1H), 5.93 (s, 1H), 4.85 – 4.64 (m, 2H), 3.90 – 3.72 (m, 1H), 3.24 (ddt, *J* = 19.0, 9.1, 2.5 Hz, 1H), 2.78 – 2.56 (m, 1H), 1.84 – 1.61 (m, 2H), 1.61 – 1.40 (m, 4H), 1.37 (s, 9H), 1.33 – 1.24 (m, 4H), 1.23 – 1.15 (m, 1H); <sup>13</sup>C NMR (75 MHz, CDCl<sub>3</sub>) δ 199.7, 162.8, 162.1, 158.9, 153.5, 144.5, 140.4, 135.9, 135.0, 131.7, 130.4, 130.0, 128.4, 127.1, 114.4, 114.1, 113.2, 112.9, 80.4, 72.9, 59.2, 42.7, 41.2, 31.2, 31.1, 27.9, 25.0, 23.30, 23.27; IR (film)  $\nu_{\max}$  3339, 2937, 2860, 1706, 1638, 1614, 1585, 1512, 1485, 1453, 1420, 1395, 1367, 1276, 1244, 1160, 1103, 1070, 1051, 1007, 907, 860, 837, 813, 771, 736 cm<sup>-1</sup>; HRMS (ESI) calcd for C<sub>30</sub>H<sub>33</sub>BrClNNaO<sub>5</sub><sup>+</sup> [M + Na]<sup>+</sup> 624.1123, found 624.1129; HPLC analysis: 97.5%ee (chiralpak IA-H, 95:5 isopropanol:hexane, 1.0 mL/min, UV: 254 nm), *t<sub>R</sub>* = 15.6 min (major), 20.5 min (minor).

**Cyclohexyl (4S,5S)-5-benzoyl-4-(5-bromo-2-((tert-butoxycarbonyl)amino)phenyl)cyclopent-1-ene-1-carboxylate (3sc)**

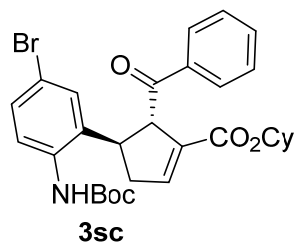

White semi-solid, 90%yield;  $[\alpha]_D^{20} = -130.2$  (*c* 1.045, CH<sub>2</sub>Cl<sub>2</sub>); <sup>1</sup>H NMR (300 MHz, CDCl<sub>3</sub>) δ 7.86 – 7.77 (m, 2H), 7.61 – 7.47 (m, 2H), 7.46 – 7.31 (m, 4H), 7.14 – 7.00 (m, 1H), 5.98 (s, 1H), 4.98 – 4.80 (m, 1H), 4.81 – 4.65 (m, 1H), 3.78 – 3.64 (m, 1H), 3.24 (ddt, *J* = 19.1, 9.3, 2.6 Hz, 1H), 2.84 – 2.58 (m, 1H), 1.83 – 1.65 (m, 2H), 1.64 – 1.54 (m, 2H), 1.52 – 1.43 (m, 1H), 1.39 (s, 9H), 1.35 – 1.12 (m, 6H); <sup>13</sup>C NMR (75 MHz, CDCl<sub>3</sub>) δ 200.6, 162.8, 152.8, 144.2, 138.1, 136.2, 136.0, 133.9, 133.2, 130.4, 129.6, 128.5, 128.4, 125.3, 118.1, 80.5, 72.9, 59.0, 42.6, 40.9, 31.2, 31.0, 27.9, 25.0, 23.29, 23.24; IR (film)  $\nu_{\max}$  3337, 3061, 2936, 2860, 1712, 1597, 1580, 1505, 1449, 1392, 1367, 1261, 1158, 1098, 1016, 802, 747, 702 cm<sup>-1</sup>; HRMS (ESI) calcd for C<sub>30</sub>H<sub>34</sub>BrNNaO<sub>5</sub><sup>+</sup> [*M* + Na]<sup>+</sup> 590.1513, found 590.1509; HPLC analysis: 96%ee (CHIRALPAK OD-H, 90:10 isopropanol:hexane, 1.0 mL/min, UV: 254 nm), *t*<sub>R</sub> = 6.1 min (minor), 12.2 min (major).

**Cyclohexyl (4S,5S)-4-(5-bromo-2-((tert-butoxycarbonyl)amino)phenyl)-5-(4-methoxybenzoyl)cyclopent-1-ene-1-carboxylate (3tc)**

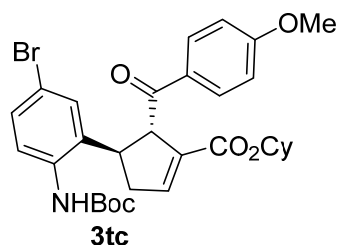

White semi-solid, 89%yield;  $[\alpha]_D^{20} = -143.5$  (*c* 0.71, CH<sub>2</sub>Cl<sub>2</sub>); <sup>1</sup>H NMR (300 MHz, CDCl<sub>3</sub>) δ 7.86 – 7.73 (m, 2H), 7.59 – 7.50 (m, 1H), 7.44 – 7.39 (m, 1H), 7.38 – 7.32 (m, 1H), 7.08 (d, *J* = 1.6 Hz, 1H), 6.95 – 6.81 (m, 2H), 6.05 (s, 1H), 4.77 (t, *J* = 6.2 Hz, 1H), 3.84 (s, 2H), 3.76 – 3.63 (m, 1H), 3.23 (ddt, *J* = 19.1, 9.2, 2.6 Hz, 1H), 2.83 – 2.55 (m, 1H), 1.75 (d, *J* = 11.1 Hz, 1H), 1.65 – 1.54 (m, 2H), 1.47 (m, 4H), 1.39 (s, 9H), 1.33 – 1.14 (m, 5H); <sup>13</sup>C NMR (75 MHz, CDCl<sub>3</sub>) δ 198.9, 163.6, 162.9, 152.8, 144.0, 136.1, 134.0, 130.9, 130.3, 129.5, 129.1, 125.1, 117.9, 113.6, 80.5, 72.7, 58.7, 55.2, 42.6, 40.8, 31.2, 31.1, 27.9, 25.1, 23.25, 23.21; IR (film)  $\nu_{\max}$  3337, 2936, 2859, 1711, 1674, 1600, 1576, 1510, 1455, 1421, 1392, 1367, 1319, 1263, 1228, 1170, 1103, 1050, 1026, 908, 839, 770, 738, 640, 615 cm<sup>-1</sup>; HRMS (ESI) calcd for C<sub>31</sub>H<sub>36</sub>BrNNaO<sub>6</sub><sup>+</sup> [*M* + Na]<sup>+</sup> 620.1618, found 620.1612; HPLC analysis: 97.4%ee (CHIRALPAK OD-H, 90:10 isopropanol:hexane, 1.0 mL/min, UV: 254 nm), *t*<sub>R</sub> = 7.6 min (minor), 15.3 min (major).

**Cyclohexyl (4S,5S)-4-(5-bromo-2-((tert-butoxycarbonyl)amino)phenyl)-5-(4-bromobenzoyl)cyclopent-1-ene-1-carboxylate (3uc)**

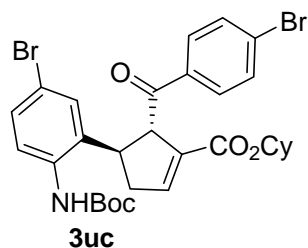

White semi-solid, 80%yield;  $[\alpha]_D^{20} = -125.9$  (*c* 0.635, CH<sub>2</sub>Cl<sub>2</sub>); <sup>1</sup>H NMR (300 MHz, CDCl<sub>3</sub>) δ 7.73 – 7.65 (m, 2H), 7.54 (m, 3H), 7.44 – 7.34 (m, 2H), 7.15 – 7.05 (m, 1H), 6.01 (s, 1H), 4.76 (d, *J* = 2.7 Hz, 1H), 3.73 (m, 1H), 3.25 (ddt, *J* = 19.1, 9.2, 2.6 Hz, 1H), 2.84 – 2.60 (m, 1H), 1.84 – 1.68 (m, 2H), 1.62 (m, 3H), 1.48 (m, 1H), 1.39 (s, 9H), 1.36 – 1.13 (m, 5H); <sup>13</sup>C NMR (75 MHz, CDCl<sub>3</sub>) δ 199.8, 162.7, 152.8, 144.4, 138.3, 135.9, 135.0, 133.9, 131.7, 130.5, 130.0, 129.5, 128.5, 125.6, 118.3, 80.7, 73.0, 59.1, 42.5, 41.0, 31.2, 31.1, 27.9, 25.0, 23.32, 23.29; IR (film)  $\nu_{\max}$  3341, 2936, 2860, 1706, 1641, 1585, 1505, 1453, 1397, 1367, 1262, 1159, 1102, 1070, 1050, 1007, 908, 853, 806, 770, 735 cm<sup>-1</sup>; HRMS (ESI) calcd for C<sub>30</sub>H<sub>33</sub>Br<sub>2</sub>NNaO<sub>5</sub><sup>+</sup> [M + Na]<sup>+</sup> 670.0600, found 670.0599; HPLC analysis: 96%ee (CHIRALPAK RC-OD-H, 90:10 isopropanol:hexane, 1.0 mL/min, UV: 254 nm), *t<sub>R</sub>* = 8.2 min (minor), 19.0 min (major).

**Cyclohexyl (4S,5S)-5-benzoyl-4-(2-bromo-6-((tert-butoxycarbonyl)amino)phenyl)cyclopent-1-ene-1-carboxylate (3vc)**

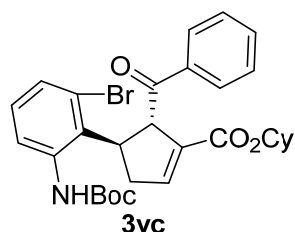

White semi-solid, 97%yield;  $[\alpha]_D^{20} = -106.1$  (*c* 0.89, CH<sub>2</sub>Cl<sub>2</sub>); <sup>1</sup>H NMR (300 MHz, CDCl<sub>3</sub>) δ 7.91 (d, *J* = 1.9 Hz, 1H), 7.83 – 7.77 (m, 2H), 7.58 – 7.50 (m, 1H), 7.44 – 7.36 (m, 2H), 7.29 – 7.22 (m, 1H), 7.19 – 7.13 (m, 1H), 7.12 – 7.05 (m, 1H), 6.12 (s, 1H), 4.83 (d, *J* = 2.6 Hz, 1H), 4.80 – 4.68 (m, 1H), 3.79 – 3.62 (m, 1H), 3.23 (ddt, *J* = 19.0, 9.2, 2.6 Hz, 1H), 2.78 – 2.53 (m, 1H), 1.82 – 1.67 (m, 2H), 1.64 – 1.50 (m, 2H), 1.40 (s, 9H), 1.34 – 1.18 (m, 7H); <sup>13</sup>C NMR (75 MHz, CDCl<sub>3</sub>) δ 200.6, 162.8, 152.6, 144.3, 136.2, 136.1, 134.1, 133.2, 128.44, 128.41, 128.1, 127.8, 120.7, 80.7, 72.8, 58.8, 42.6, 40.8, 31.2, 31.0, 27.9, 25.0, 23.3, 23.2; IR (film)  $\nu_{\max}$  3337, 3062, 2937, 2860, 1712, 1641, 1595, 1577, 1511, 1449, 1410, 1392, 1367, 1263, 1158, 1103, 1051, 1014, 919, 855, 806, 747, 700, 572 cm<sup>-1</sup>; HRMS (ESI) calcd for C<sub>30</sub>H<sub>34</sub>BrNNaO<sub>5</sub><sup>+</sup> [M + Na]<sup>+</sup> 590.1513, found 590.1518; HPLC analysis: 97%ee (CHIRALPAK AD-H, 90:10 isopropanol:hexane, 1.0 mL/min, UV: 254 nm), *t<sub>R</sub>* = 16.5 min (major), 40.7 min (minor).

**Cyclohexyl (4S,5S)-5-acetyl-4-(2-((tert-butoxycarbonyl)amino)phenyl)cyclopent-1-ene-1-carboxylate (3wc)**

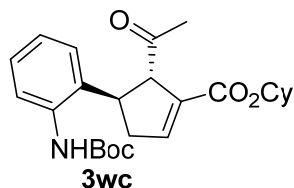

Colorless liquid, 96% yield;  $[\alpha]_D^{20} = -49.1$  (*c* 0.56, CH<sub>2</sub>Cl<sub>2</sub>); <sup>1</sup>H NMR (300 MHz, CDCl<sub>3</sub>) δ 7.61 (d, *J* = 7.9 Hz, 1H), 7.27 – 7.18 (m, 2H), 7.17 – 7.09 (m, 1H), 7.04 (dd, *J* = 4.2, 2.5 Hz, 1H), 6.65 (s, 1H), 4.82 (td, *J* = 8.8, 3.9 Hz, 1H), 3.93 (d, *J* = 2.4 Hz, 1H), 3.80 (dt, *J* = 10.0, 5.0 Hz, 1H), 3.11 (ddt, *J* = 19.1, 8.9, 2.6 Hz, 1H), 2.73 – 2.57 (m, 1H), 2.24 (s, 3H), 1.94 – 1.64 (m, 4H), 1.57 (d, *J* = 3.2 Hz, 1H), 1.52 (s, 9H), 1.48 – 1.38 (m, 3H), 1.31 (m, 2H); <sup>13</sup>C NMR (75 MHz, CDCl<sub>3</sub>) δ 210.0, 163.2, 153.6, 144.8, 136.5, 135.3, 134.7, 127.2, 126.1, 125.2, 124.3, 80.2, 73.0, 64.6, 42.0, 40.1, 31.4, 31.3, 30.0, 28.1, 25.1, 23.5; IR (film)  $\nu_{\max}$  3336, 2979, 2932, 1714, 1634, 1587, 1514, 1451, 1392, 1368, 1246, 1164, 1100, 1048, 1023, 910, 860, 752, 617 cm<sup>-1</sup>; HRMS (ESI) calcd for C<sub>21</sub>H<sub>27</sub>NNaO<sub>5</sub><sup>+</sup> [*M* + Na]<sup>+</sup> 450.2251, found 450.2247; HPLC analysis: 97% ee (chiralpak AD-H, 95:5 isopropanol:hexane, 1.0 mL/min, UV: 254 nm), *t<sub>R</sub>* = 13.6 min (major), 19.4 min (minor).

**Ethyl (2S,3S)-2-benzoyl-3-(2-((tert-butoxycarbonyl)amino)phenyl)-6-oxabicyclo[3.1.0]hexane-1-carboxylate (8)**

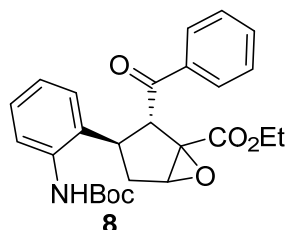

Prepared according to the general procedure as described above in 89 % yield. It was purified by flash chromatography (10% EtOAc/PE) to afford yellow liquid.  $[\alpha]_D^{20} = -105.9$  (*c* 0.62, CH<sub>2</sub>Cl<sub>2</sub>) <sup>1</sup>H NMR (300 MHz, CDCl<sub>3</sub>) δ 7.74 – 7.63 (m, 2H), 7.55 – 7.42 (m, 2H), 7.41 – 7.34 (m, 1H), 7.33 – 7.26 (m, 2H), 7.20 – 7.09 (m, 2H), 4.42 (d, *J* = 9.9 Hz, 1H), 4.06 (q, *J* = 7.1 Hz, 1H), 3.85 (s, 1H), 3.71 (dt, *J* = 17.8, 8.9 Hz, 1H), 2.65 (dd, *J* = 14.6, 7.6 Hz, 1H), 2.16 (dd, *J* = 13.5, 10.3 Hz, 1H), 1.49 (s, 6H), 1.08 (t, *J* = 7.1 Hz, 2H); <sup>13</sup>C NMR (75 MHz, DMSO-*d*<sub>6</sub>) δ 199.5, 167.5, 153.4, 136.8, 135.9, 133.1, 131.2, 128.4, 128.0, 127.4, 127.1, 124.7, 123.8, 80.2, 64.1, 61.8, 61.2, 55.0, 35.8, 35.4, 28.2, 13.6; IR (film)  $\nu_{\max}$  3358, 2979, 2932, 1727, 1677, 1589, 1517, 1478, 1450, 1391, 1367, 1299, 1226, 1159, 1122, 1072, 1053, 1023, 946, 885, 752, 690 cm<sup>-1</sup>; HRMS (ESI) calcd for C<sub>25</sub>H<sub>29</sub>NNaO<sub>6</sub><sup>+</sup> [*M* + Na]<sup>+</sup> 474.1894, found 474.1898 ; HPLC analysis: 96% ee (CHIRALPAK RC-OD-H, 90:10 isopropanol:hexane, 1.0 mL/min, UV: 254 nm), *t<sub>R</sub>* = 13.0 min (major), 18.6 min (minor).





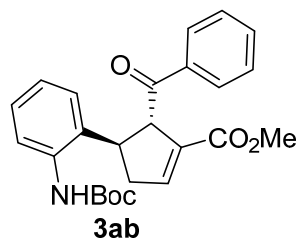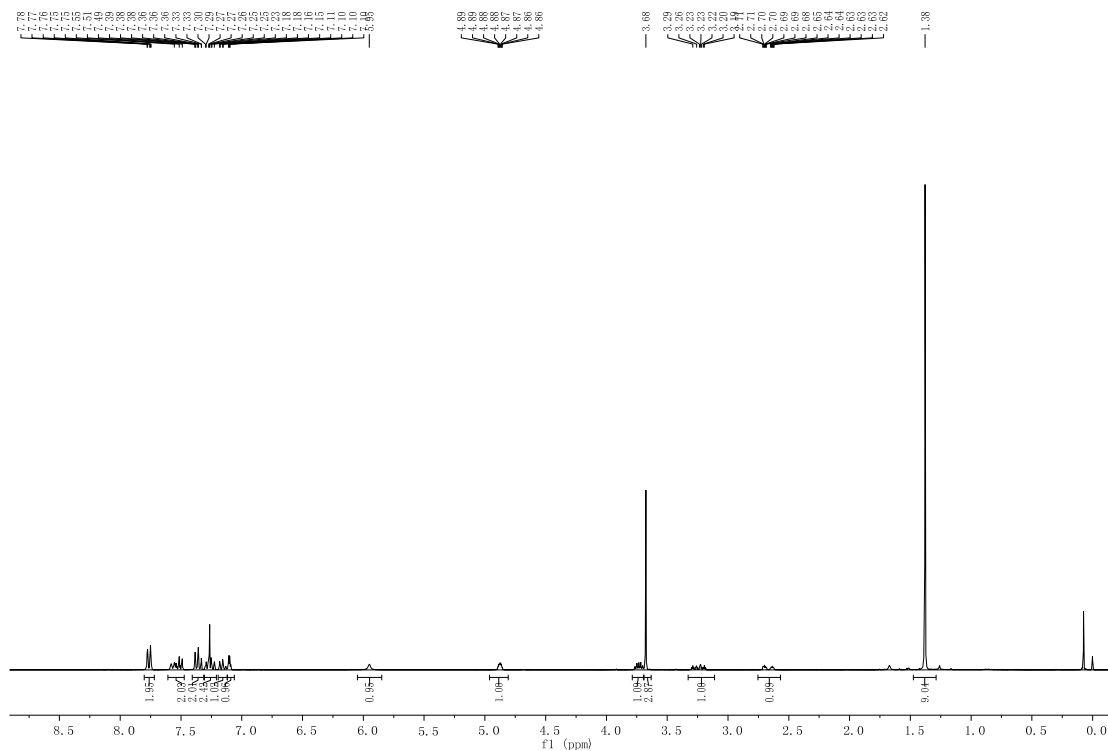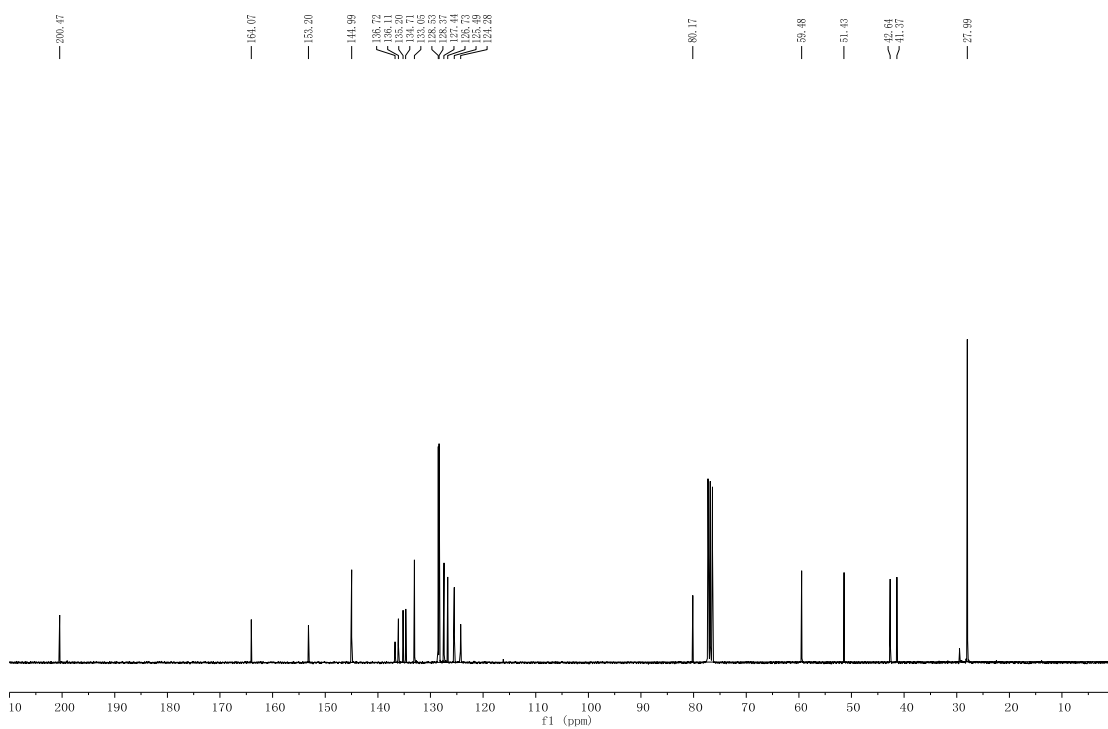







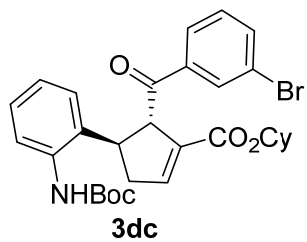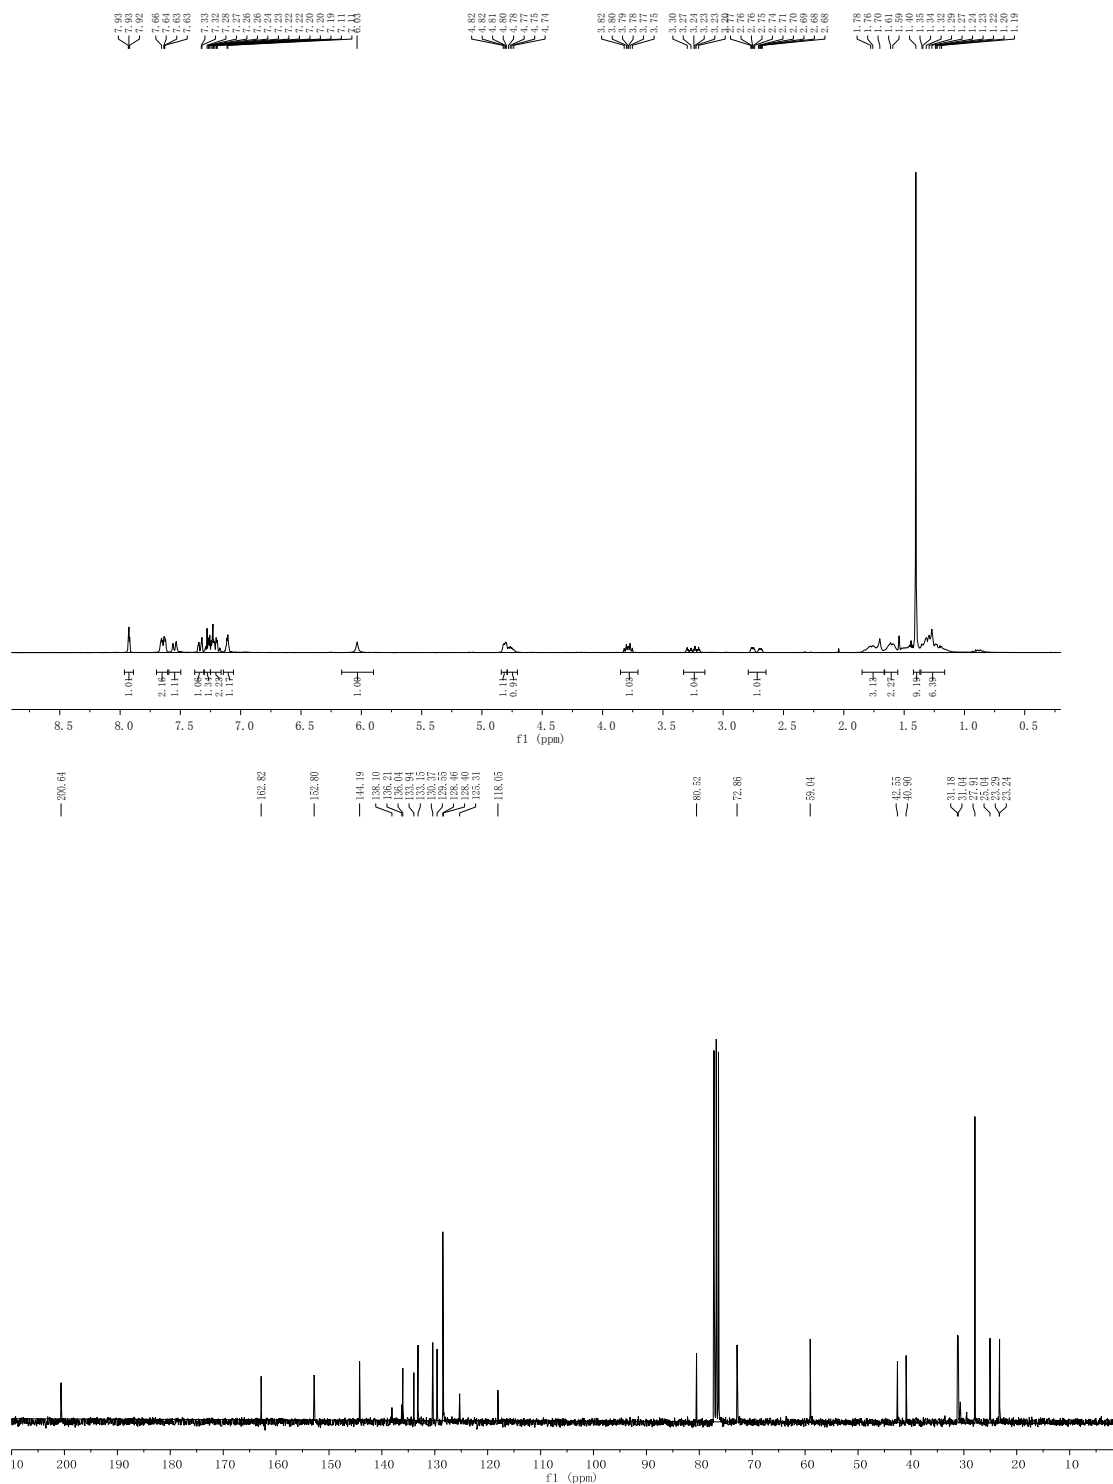



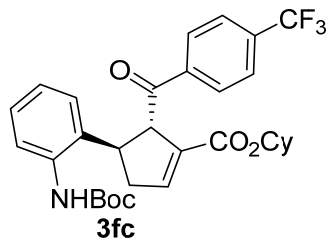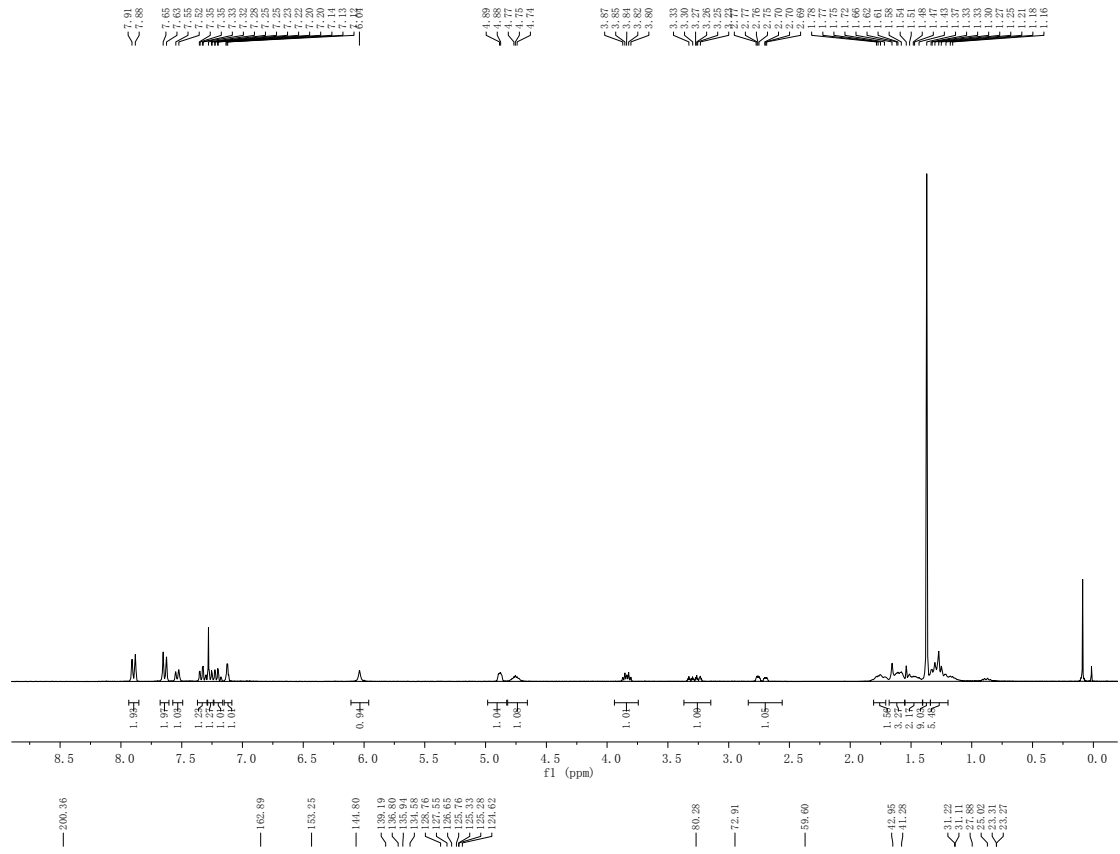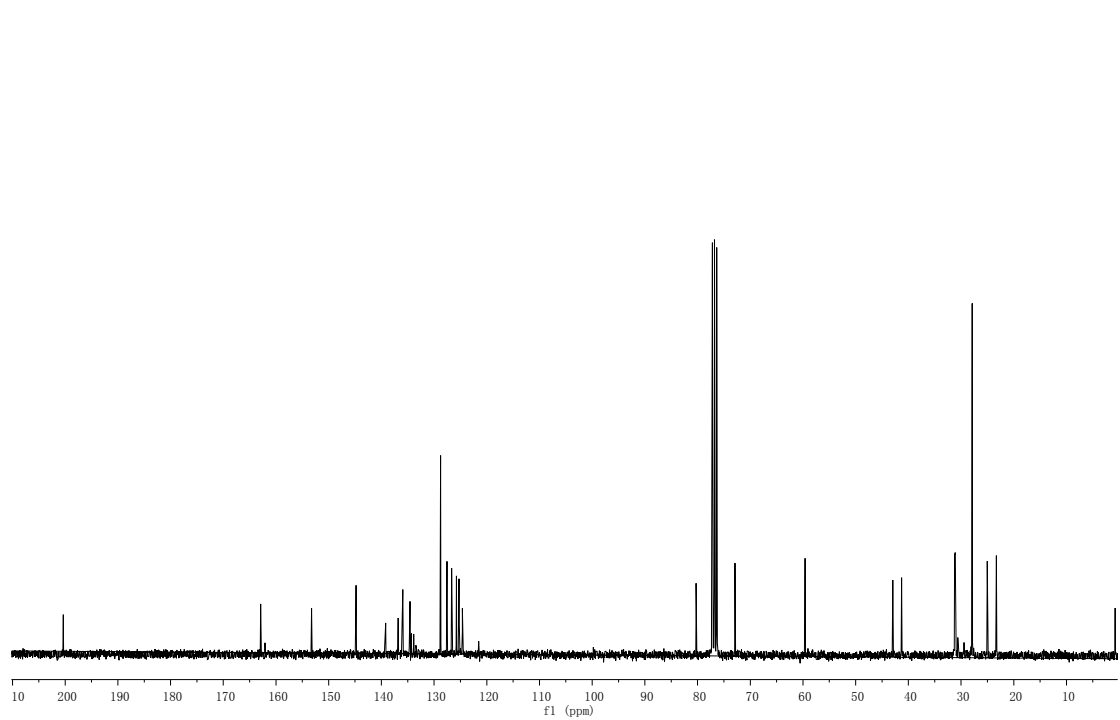



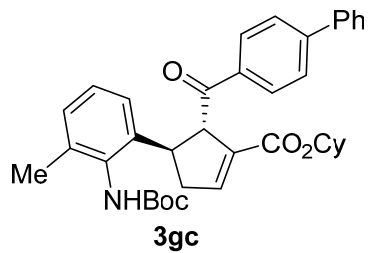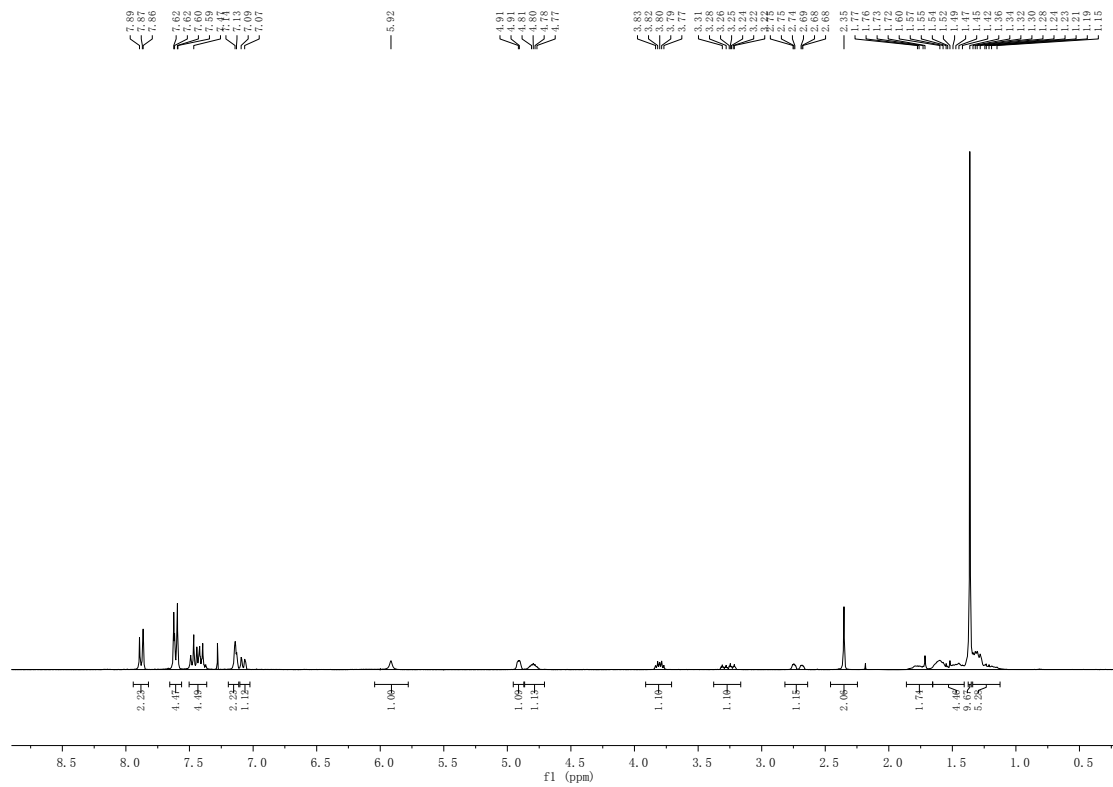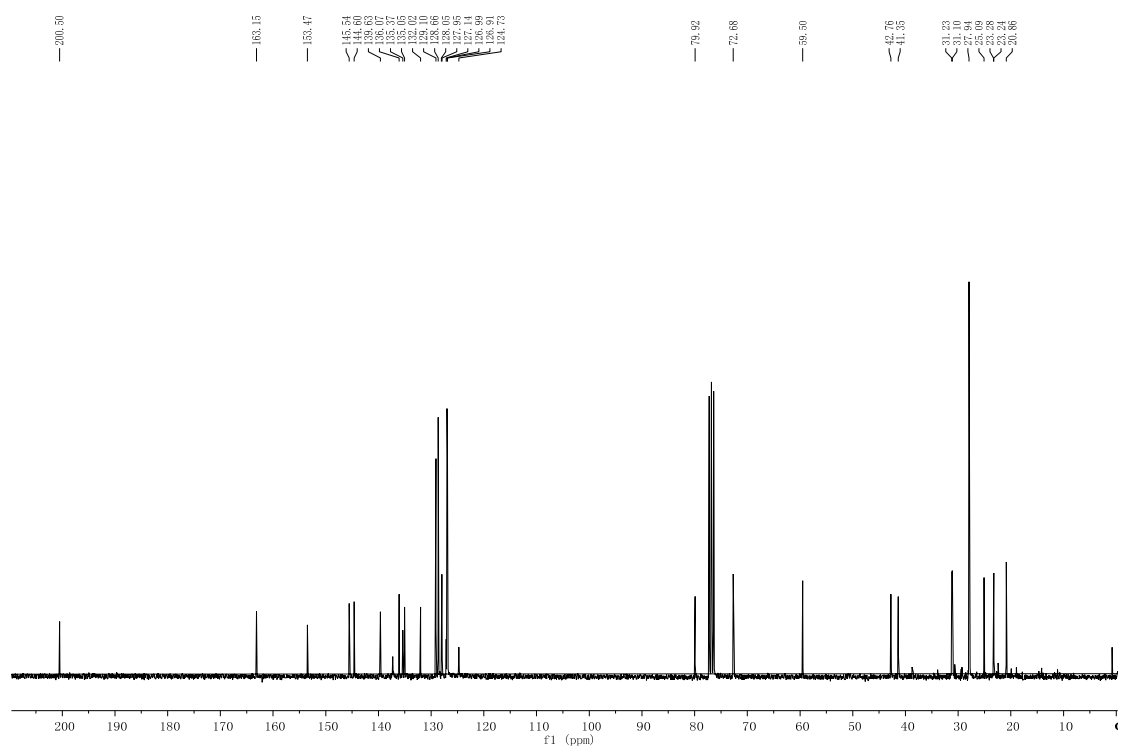

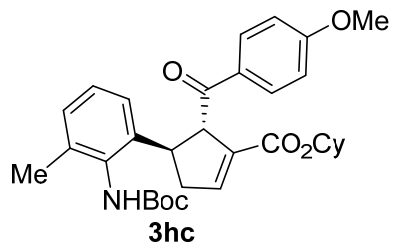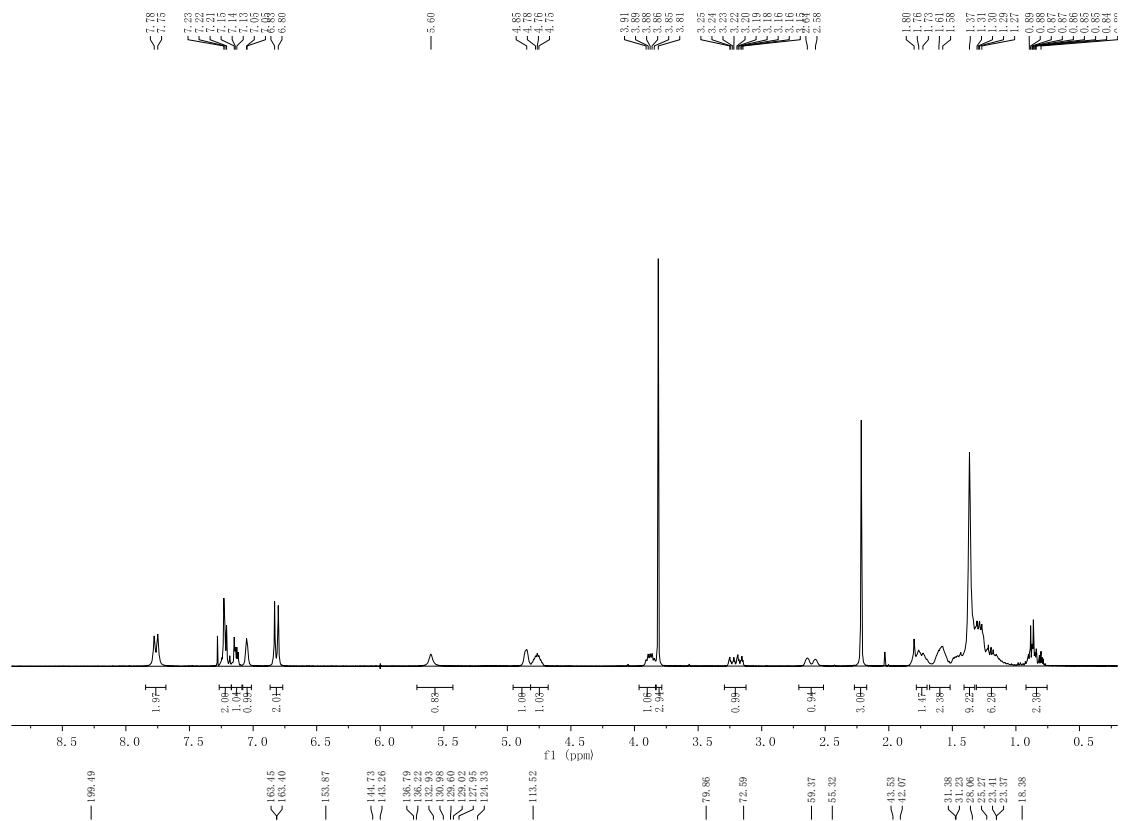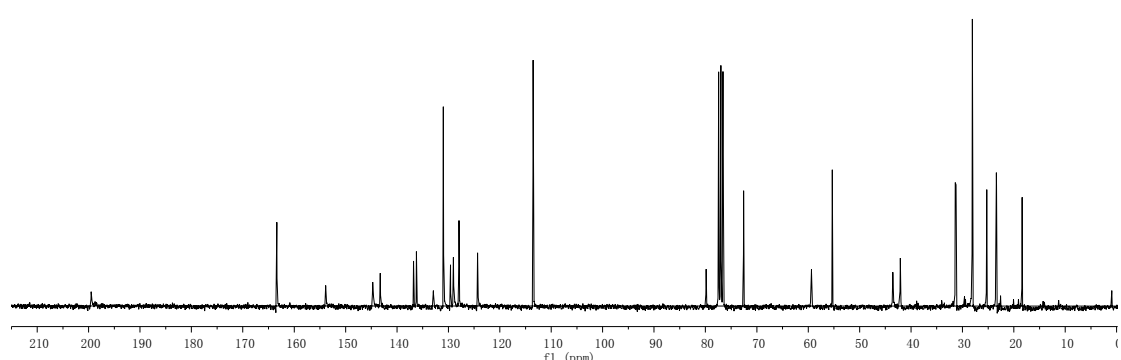

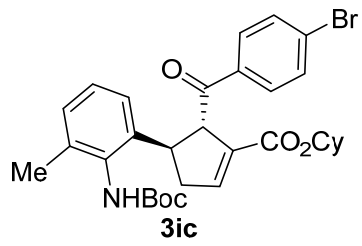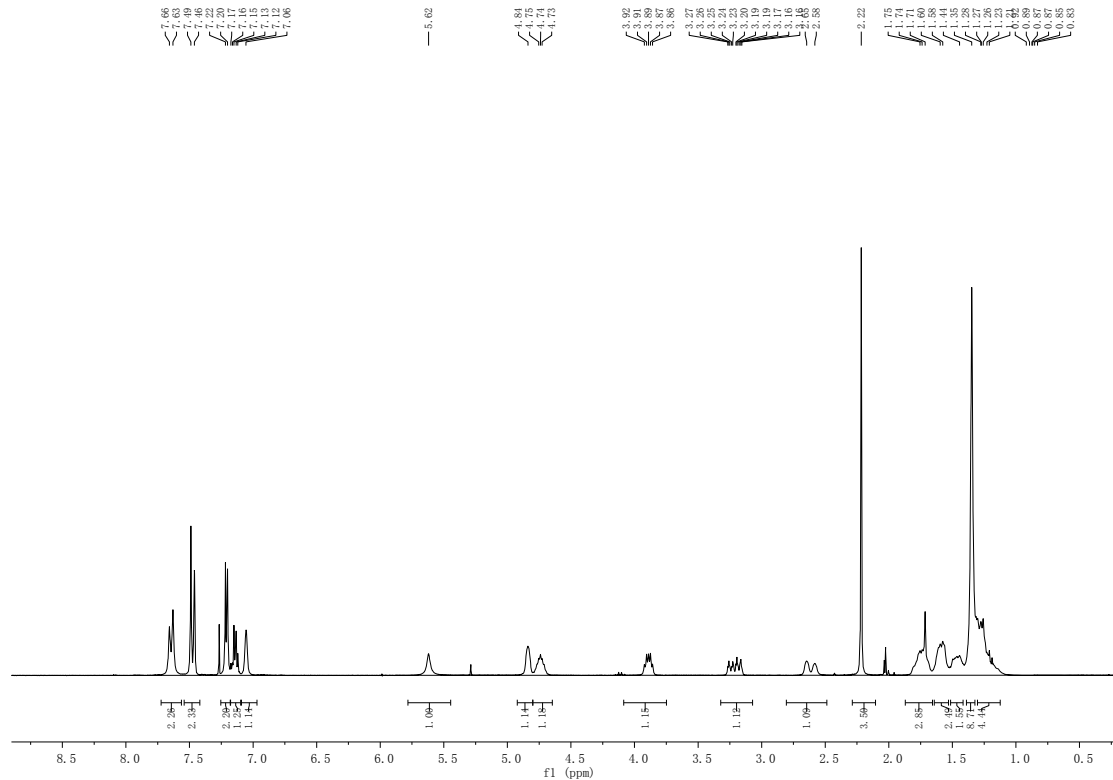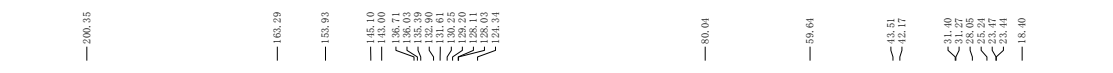

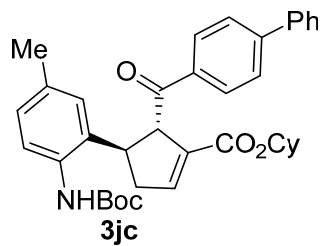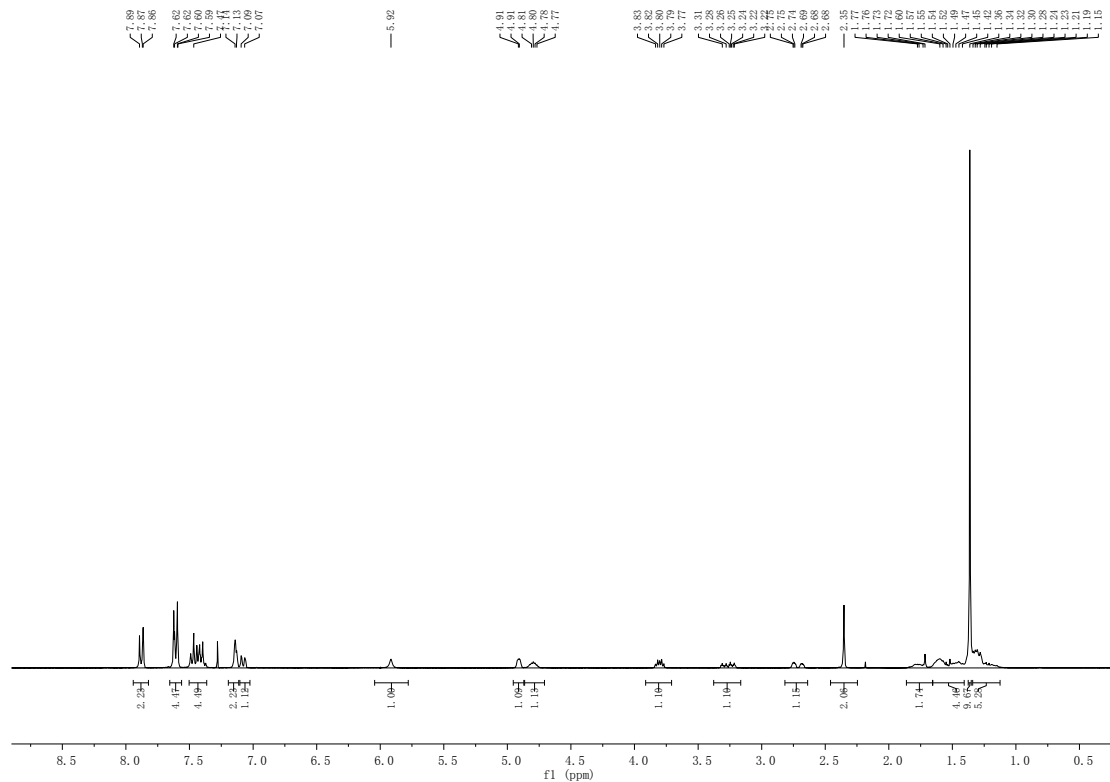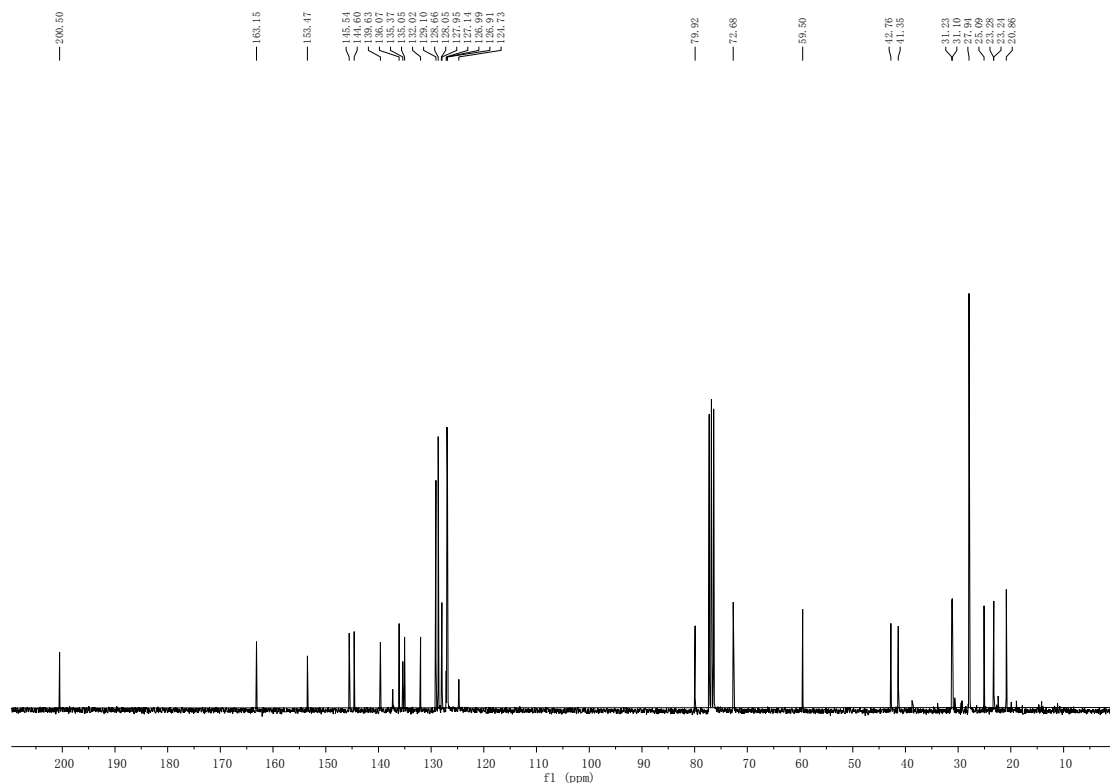



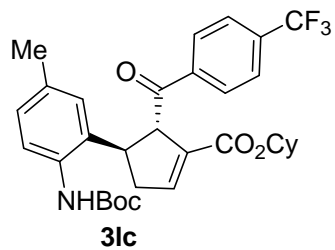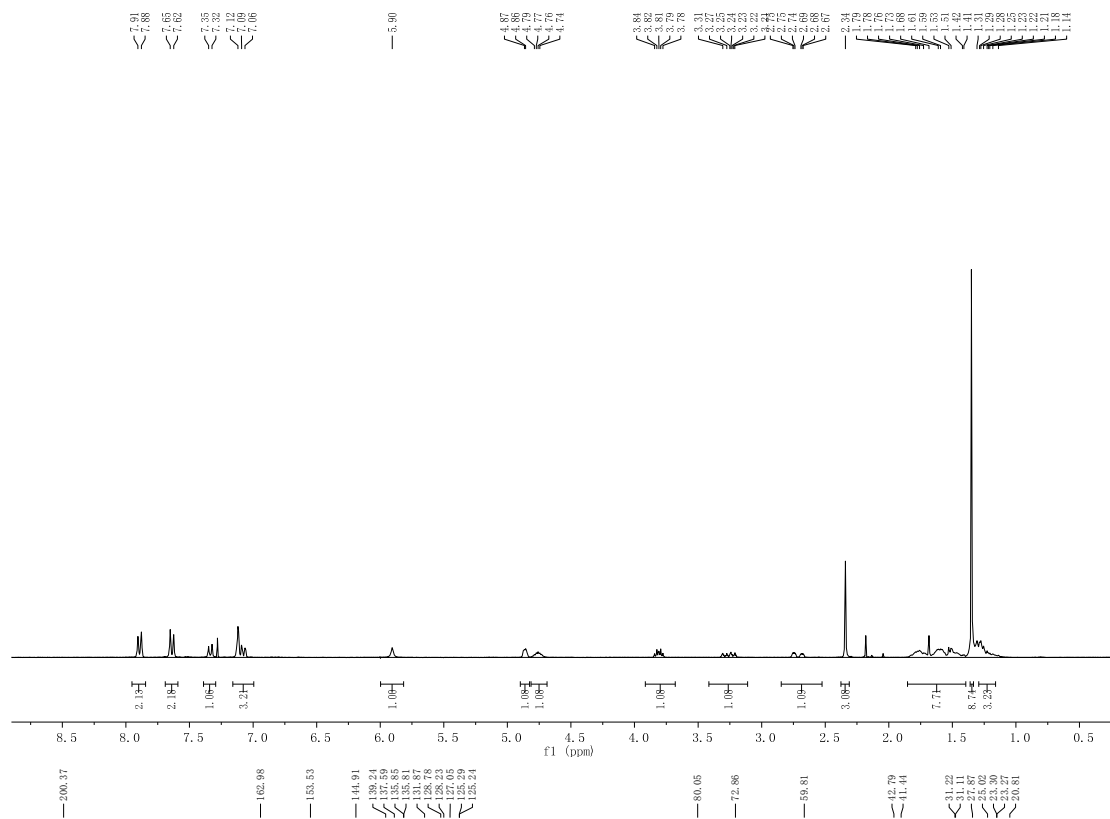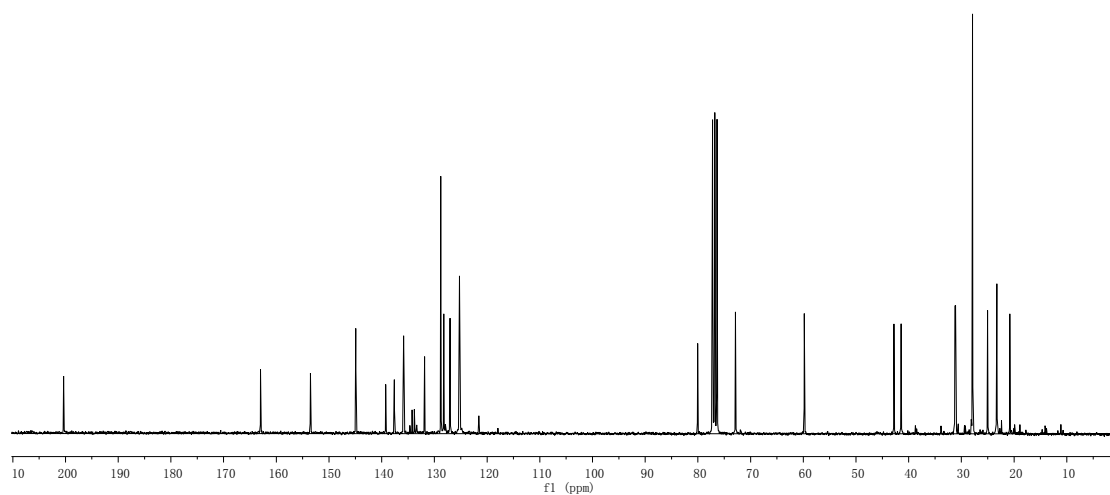

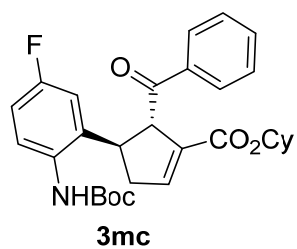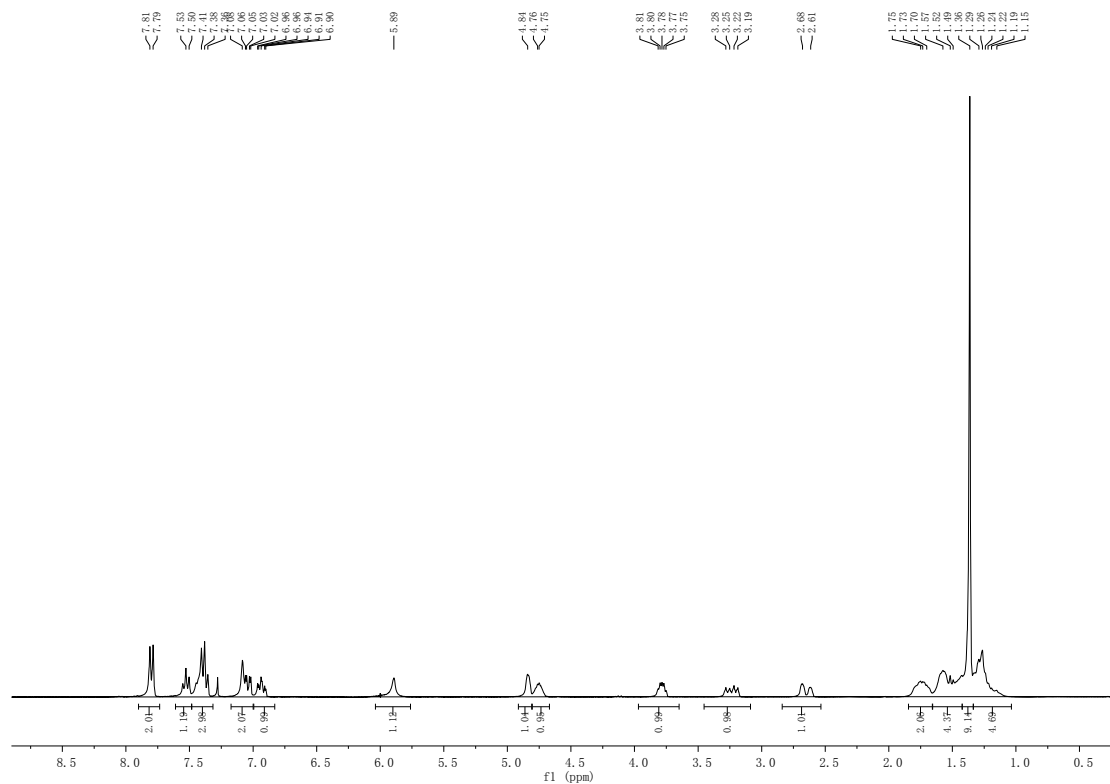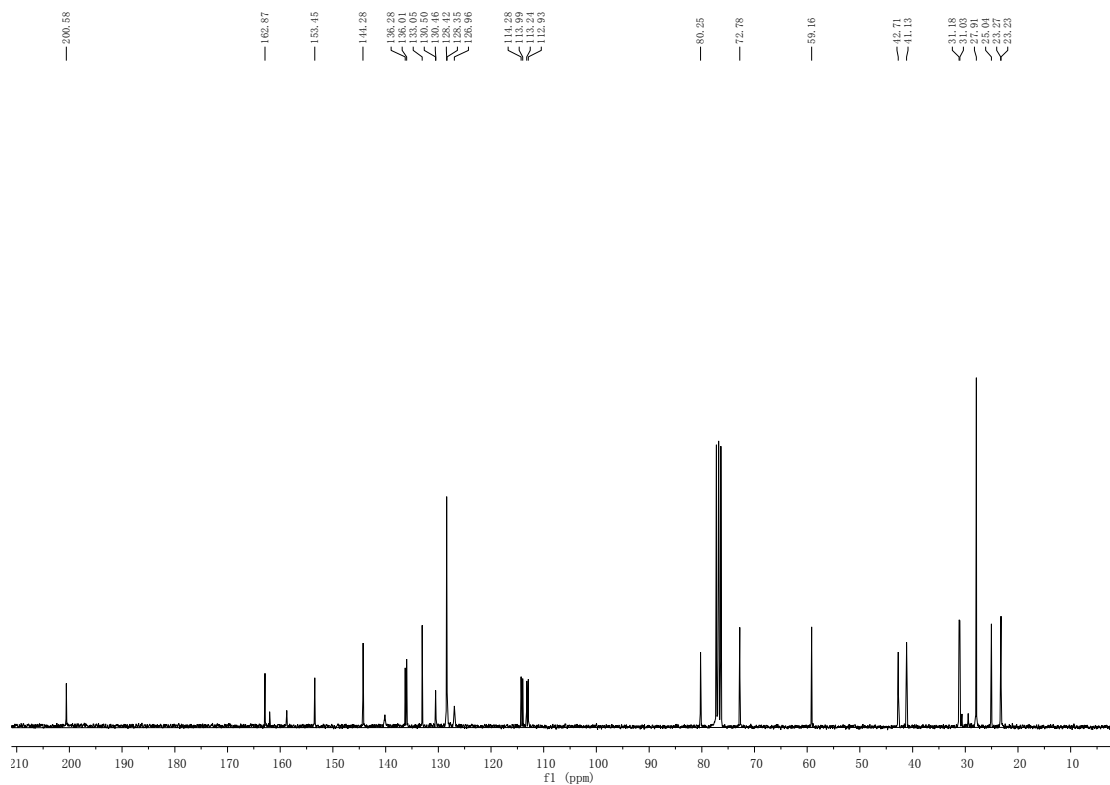

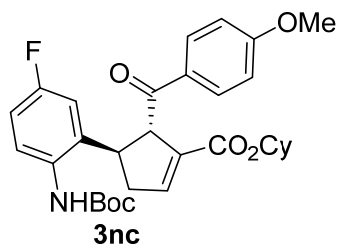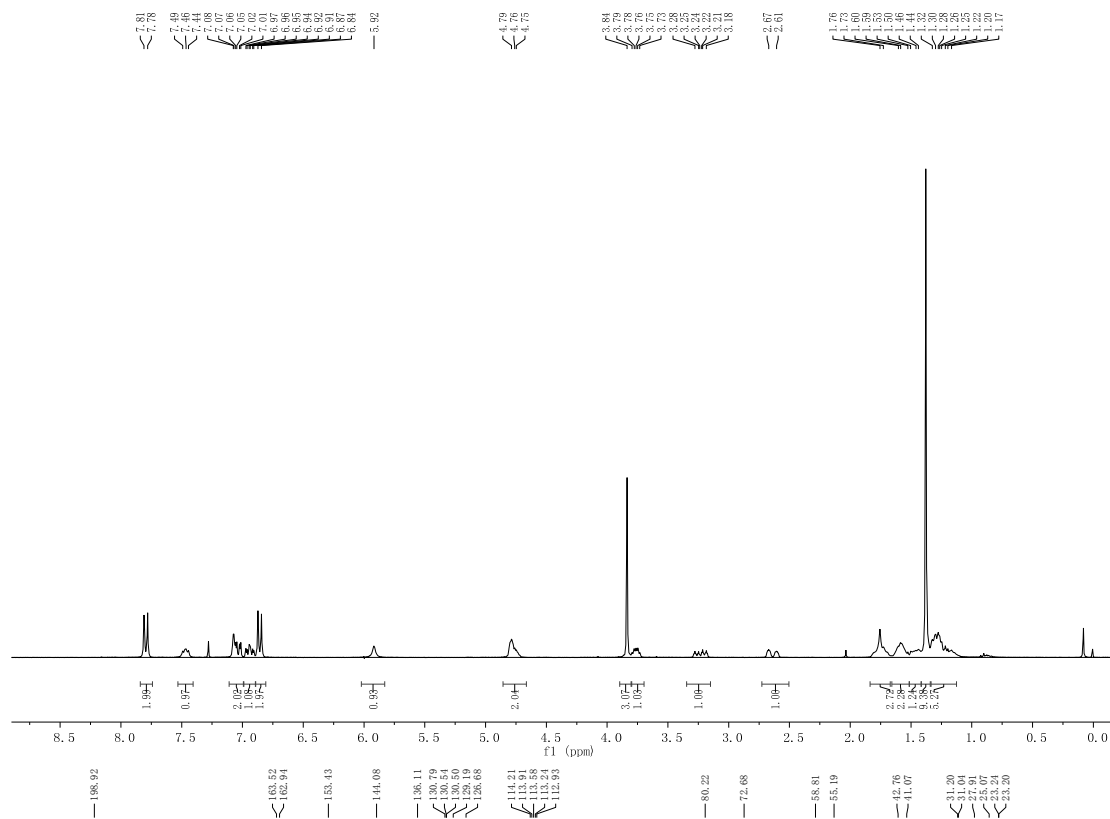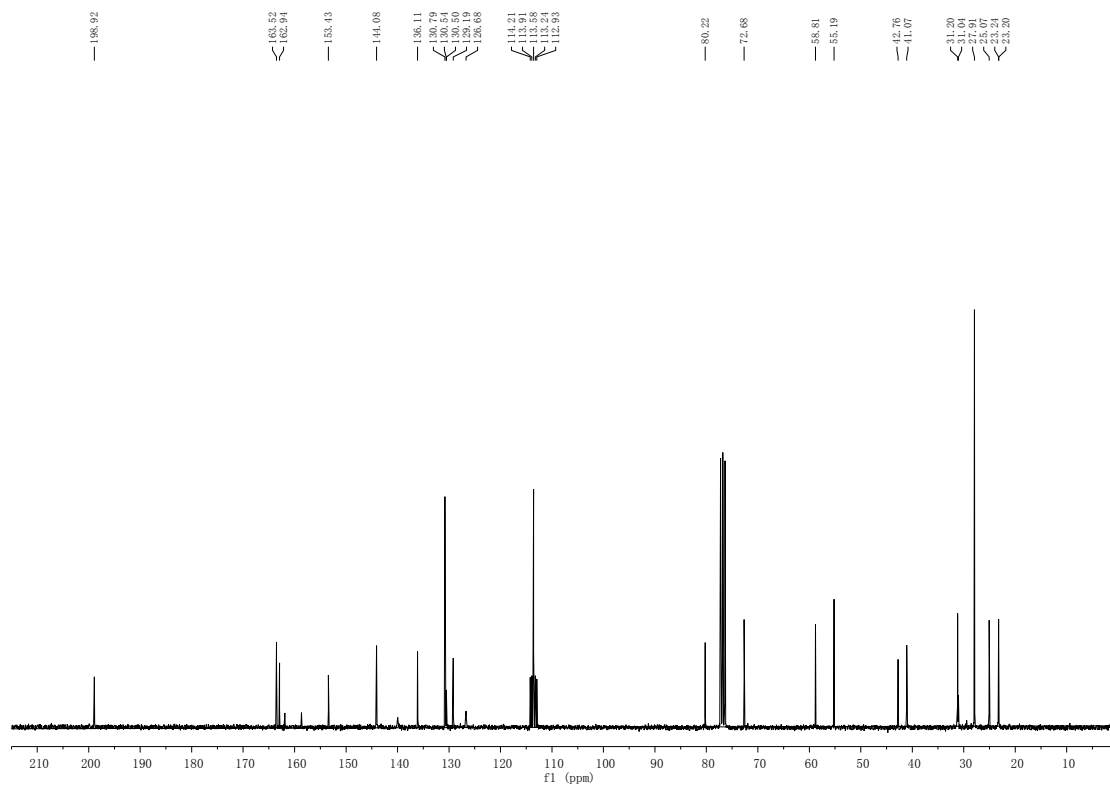





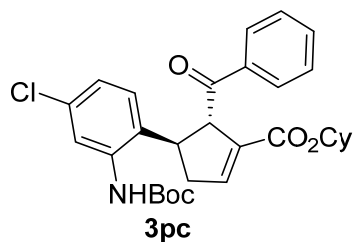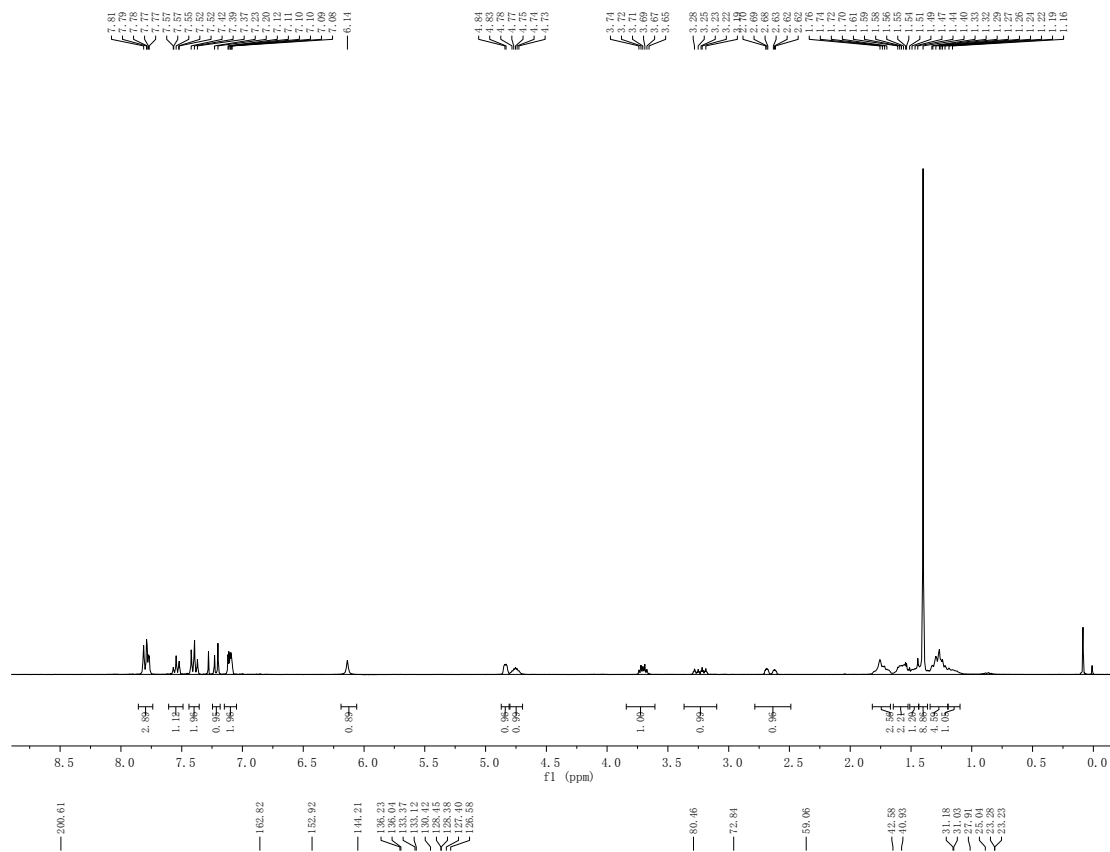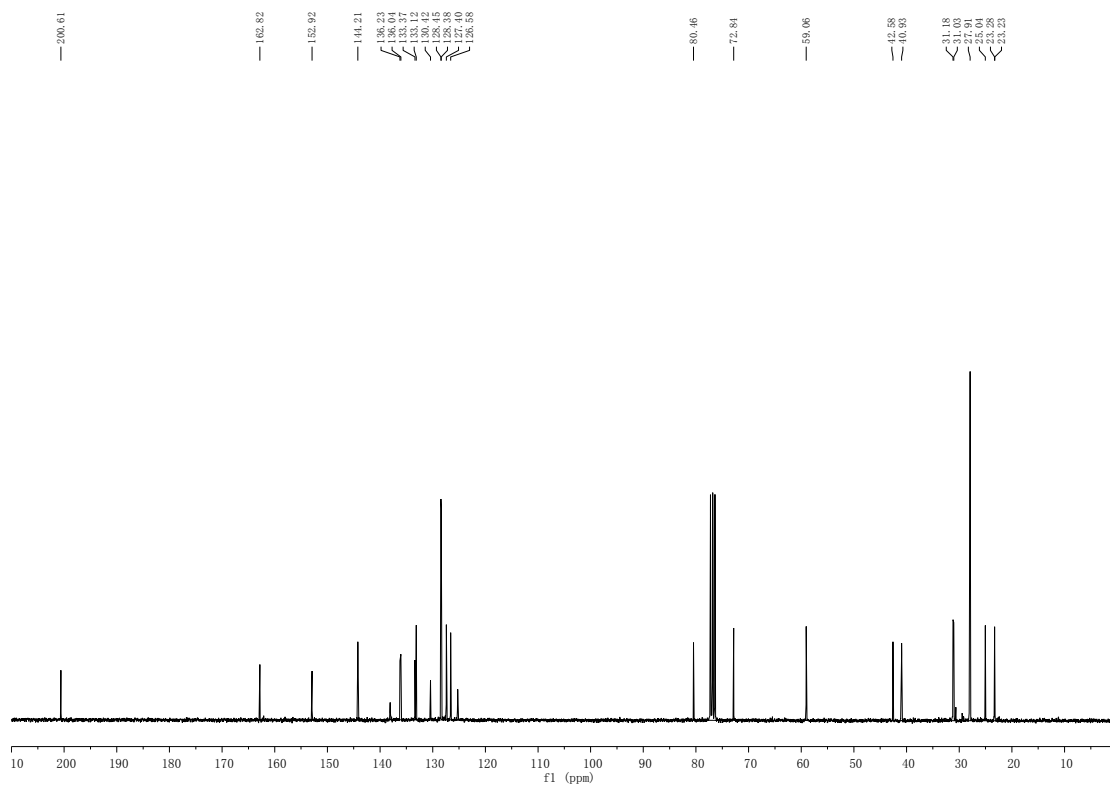









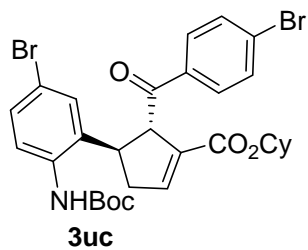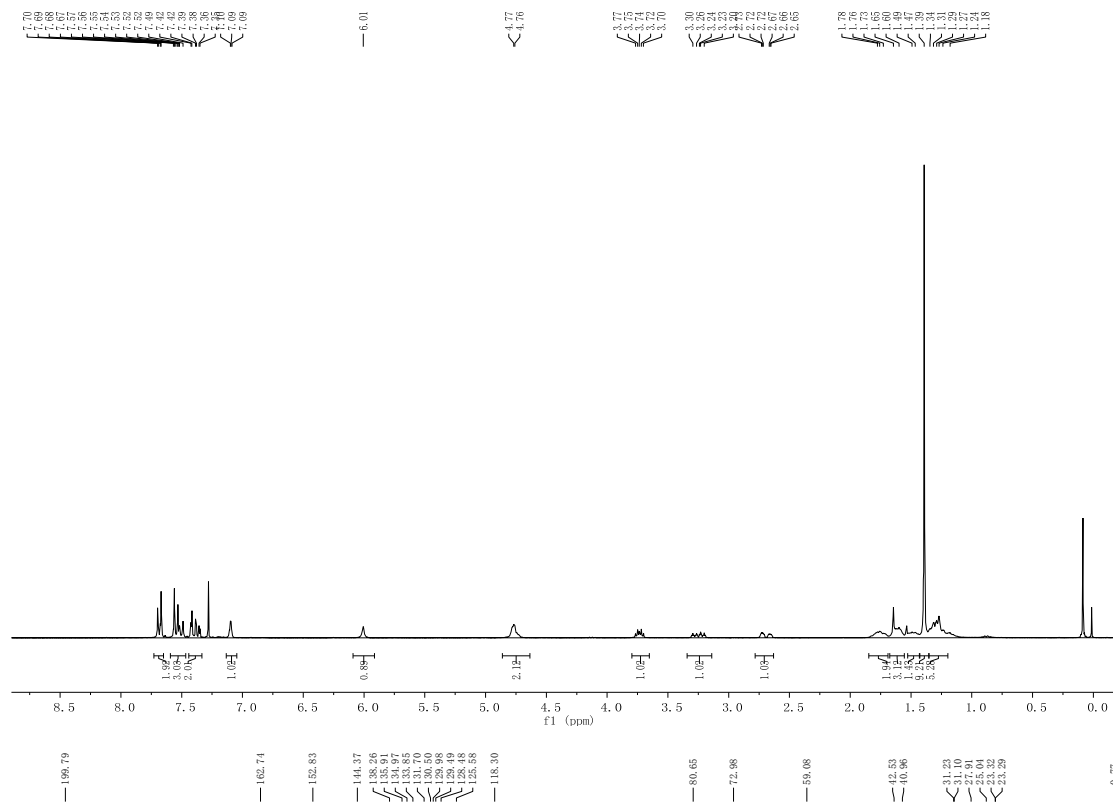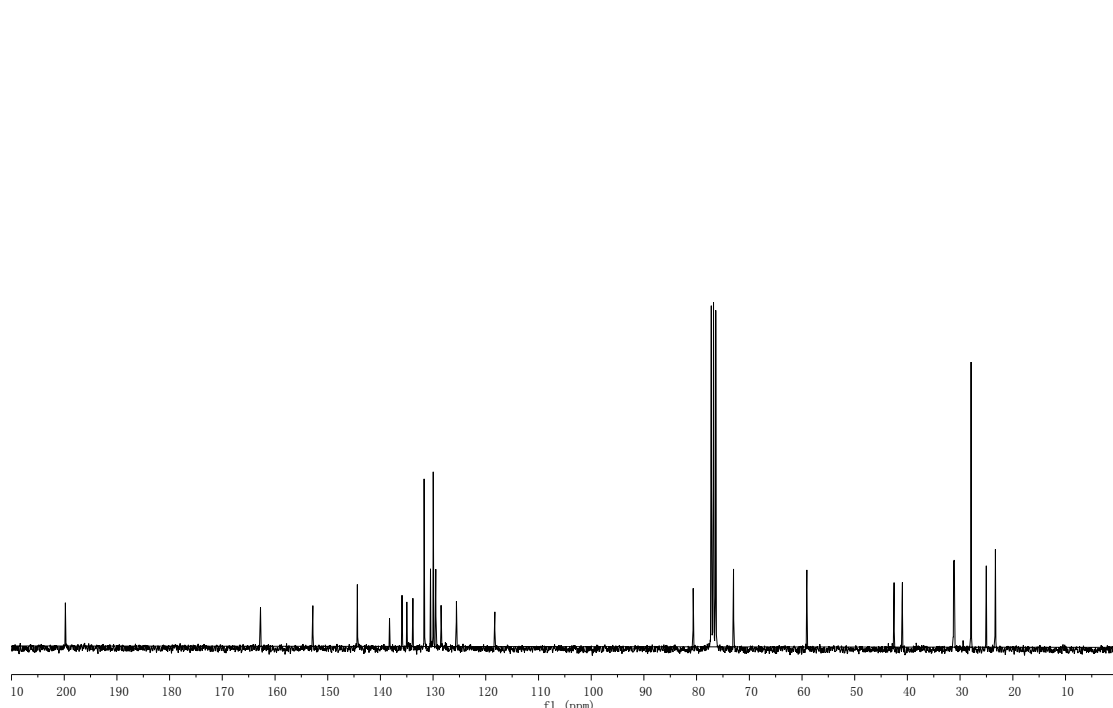

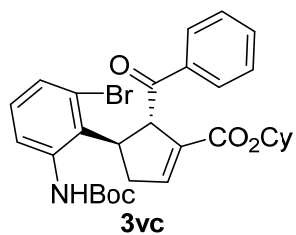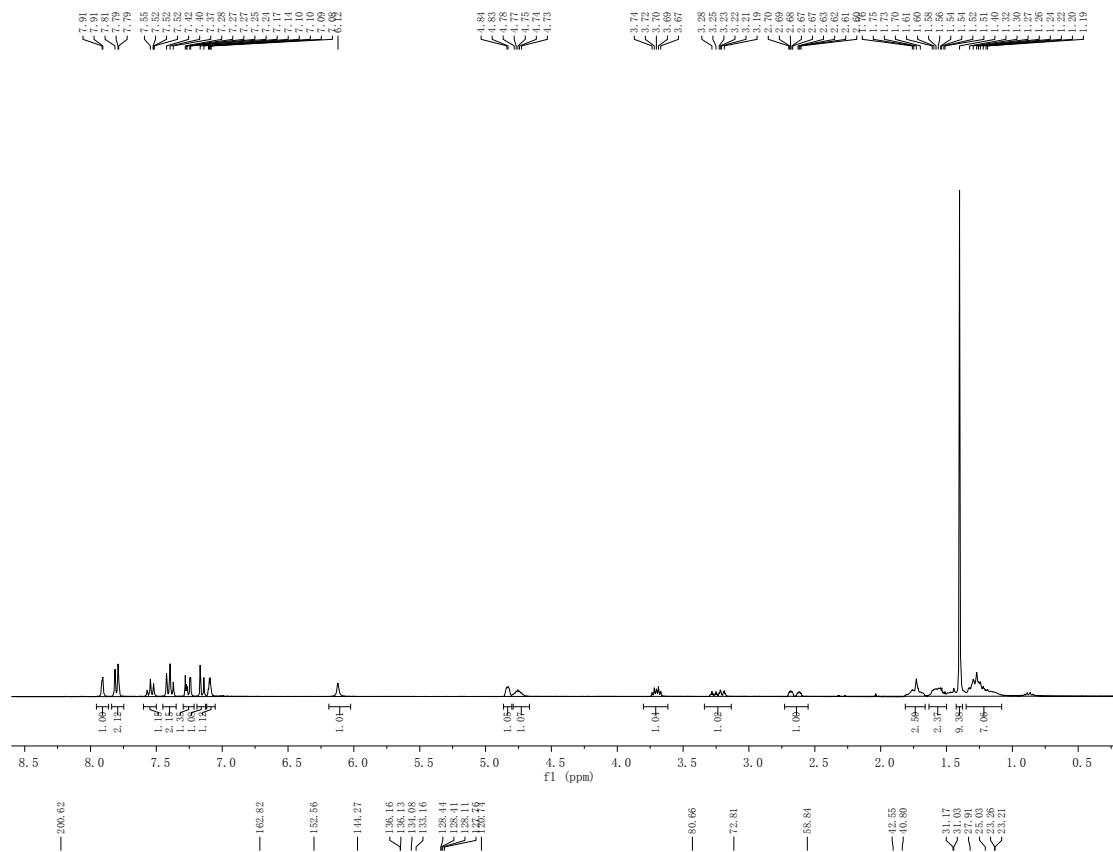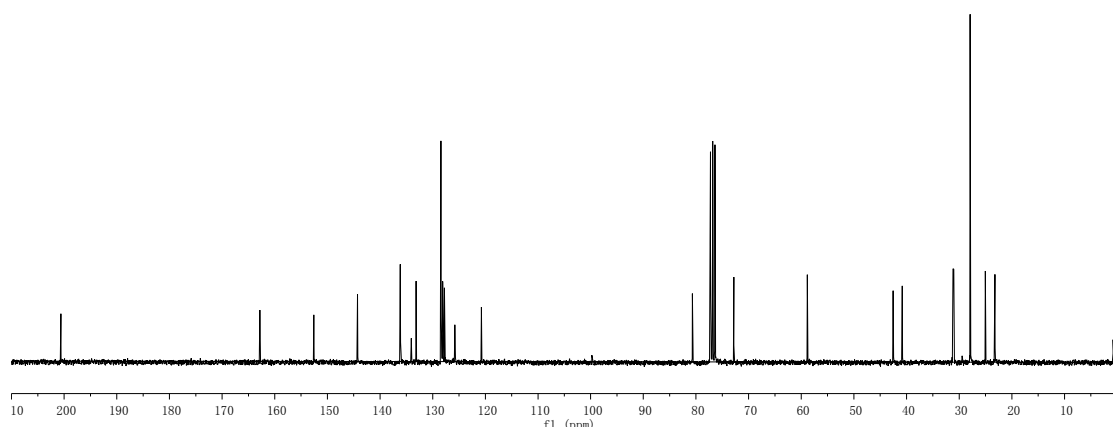



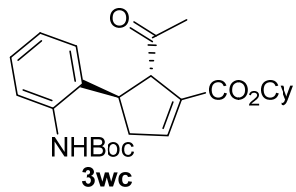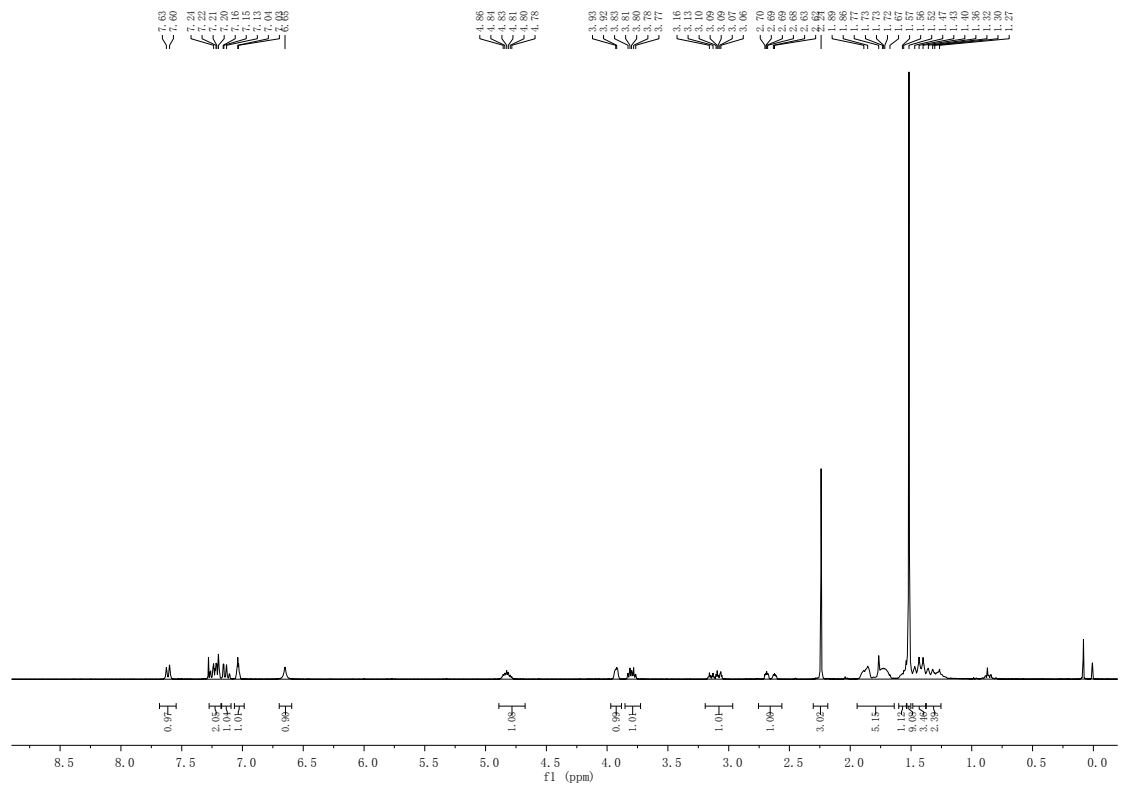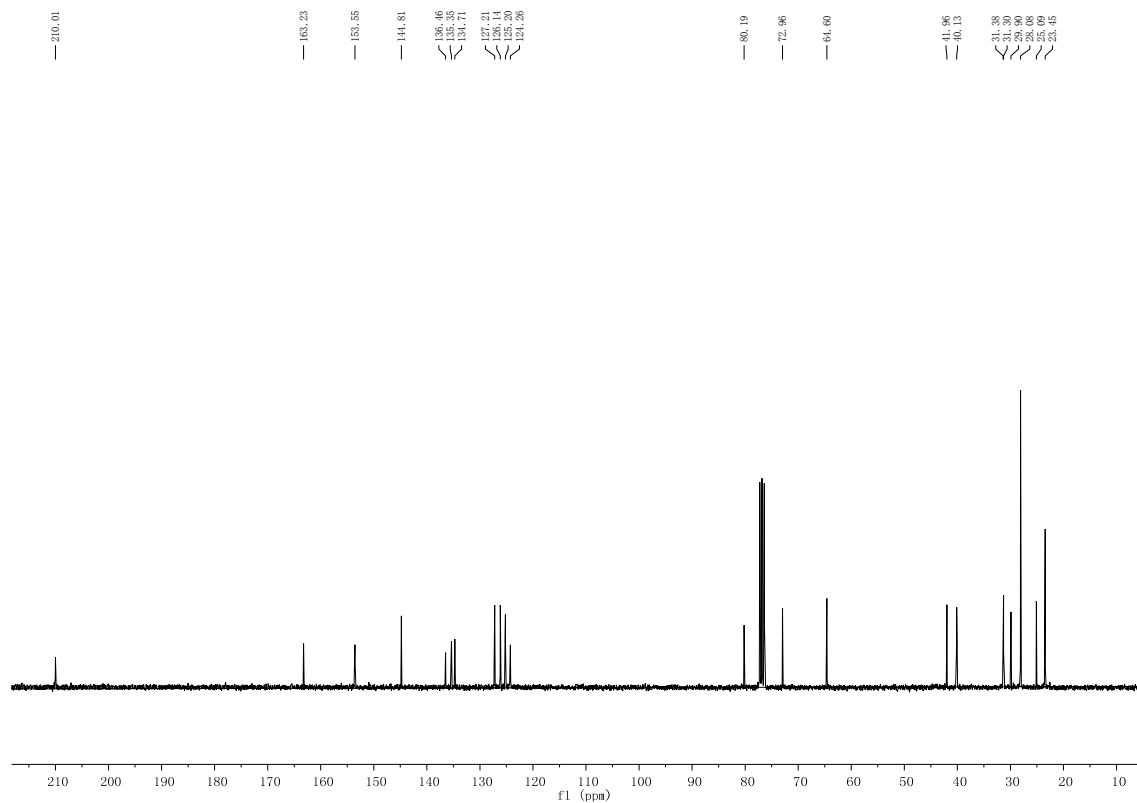

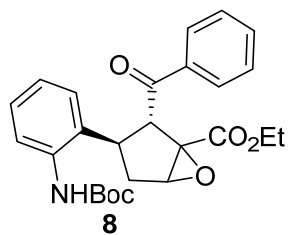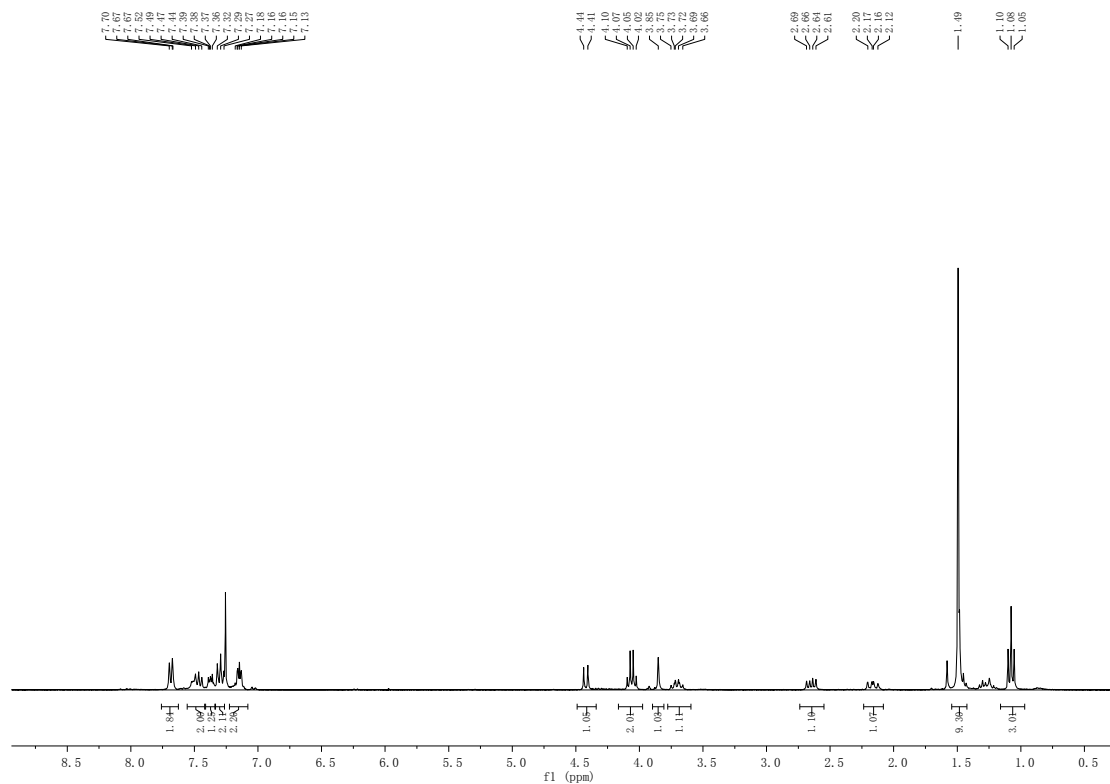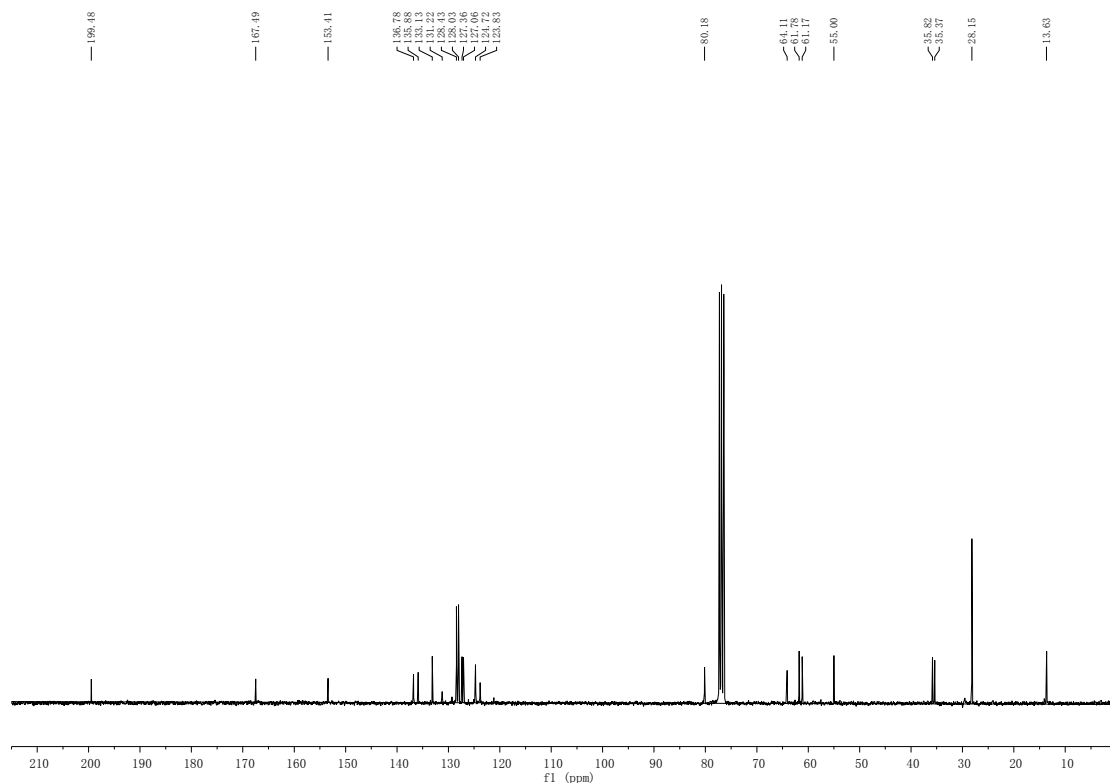

COSY, 2D NMR of **8**

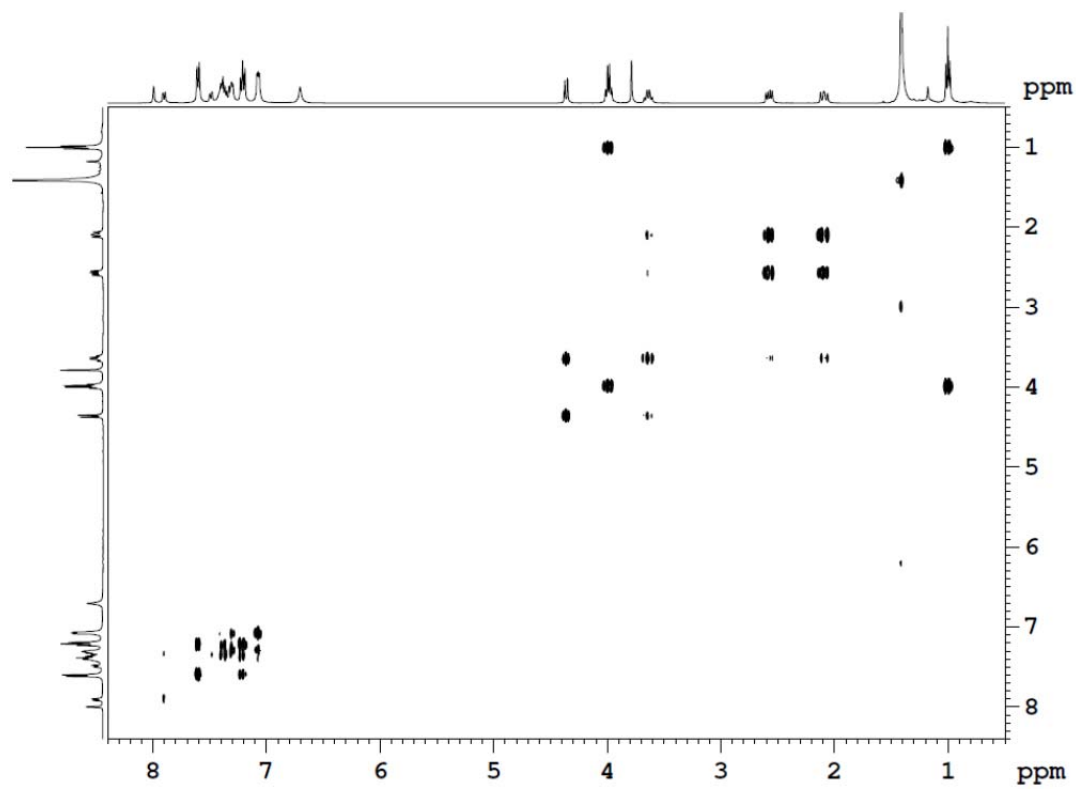

HSQC, 2D NMR of **8**

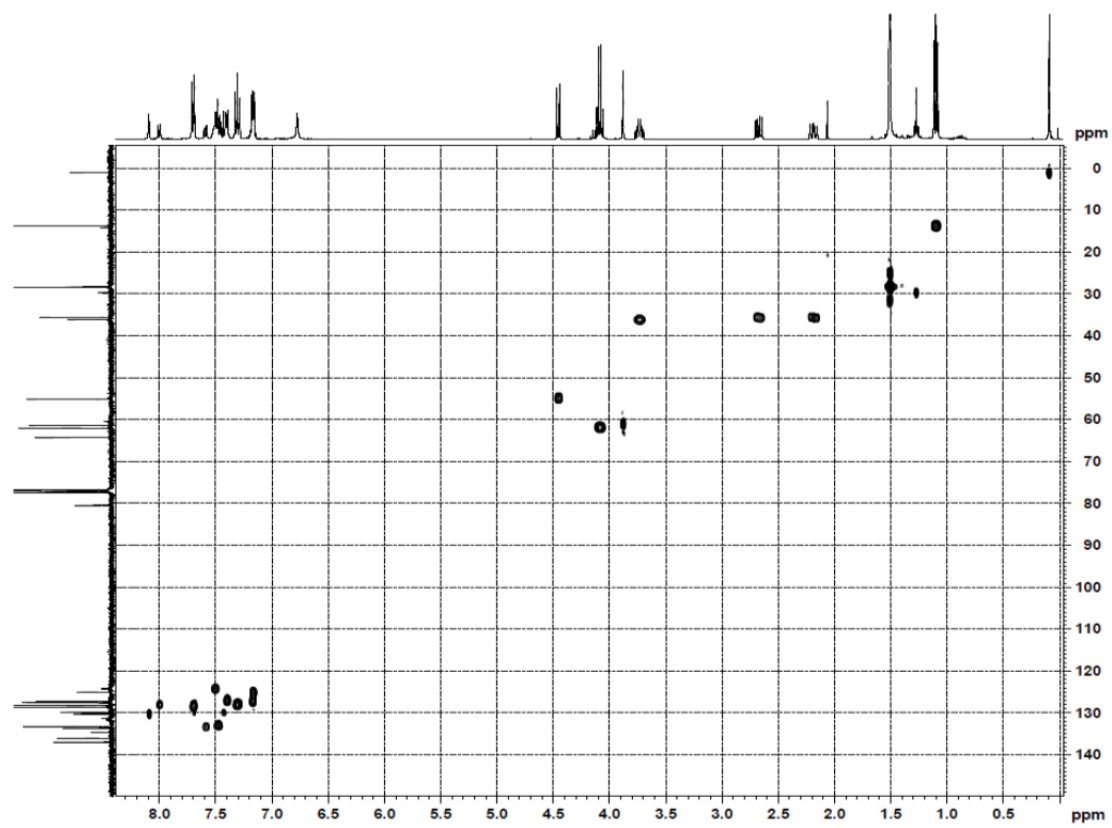

HMBC, 2D NMR of **8**

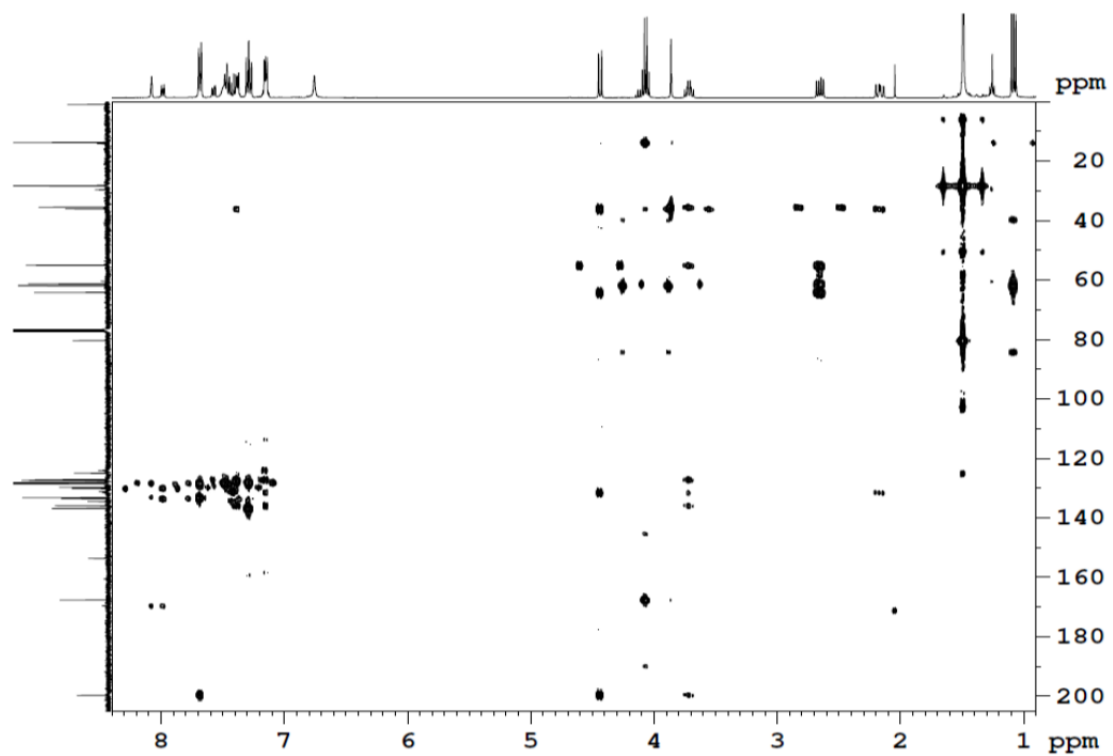

NOSEY, 2D NMR of **8**

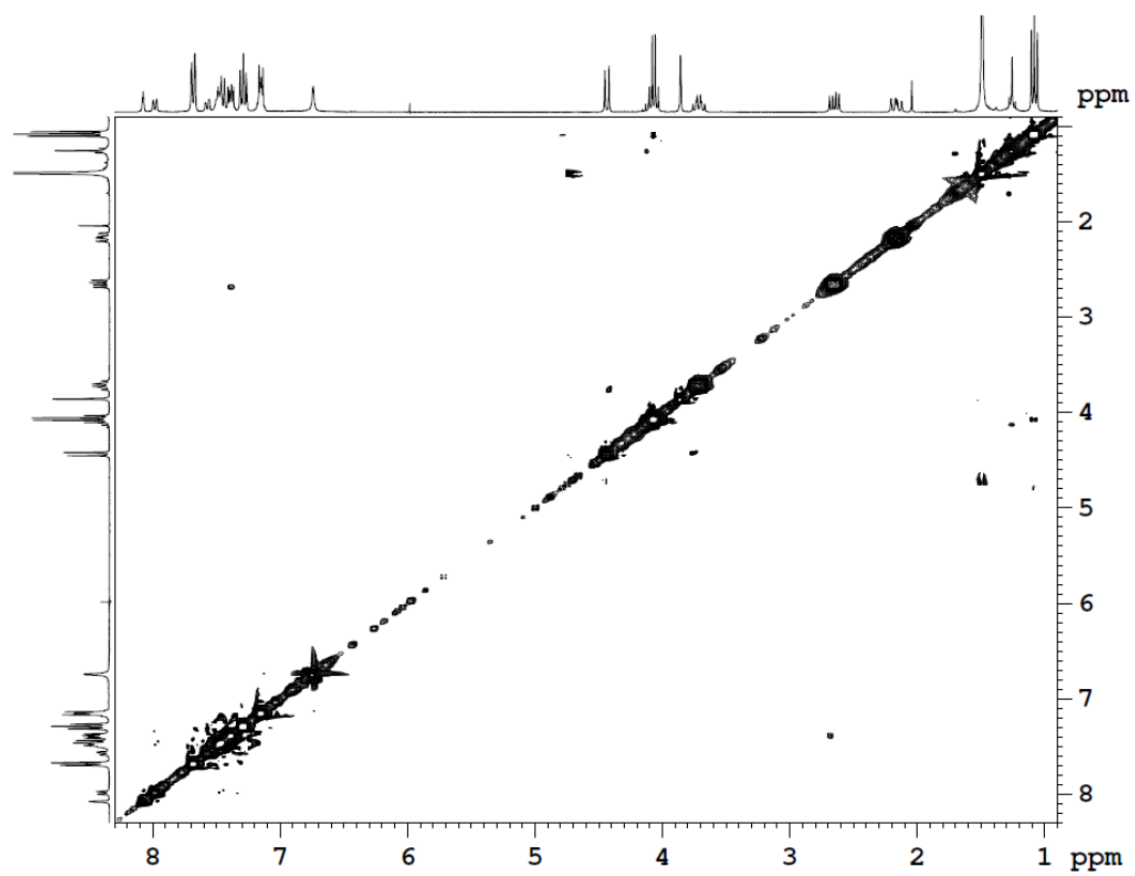

## HPLC chromatogram of racemic 3aa

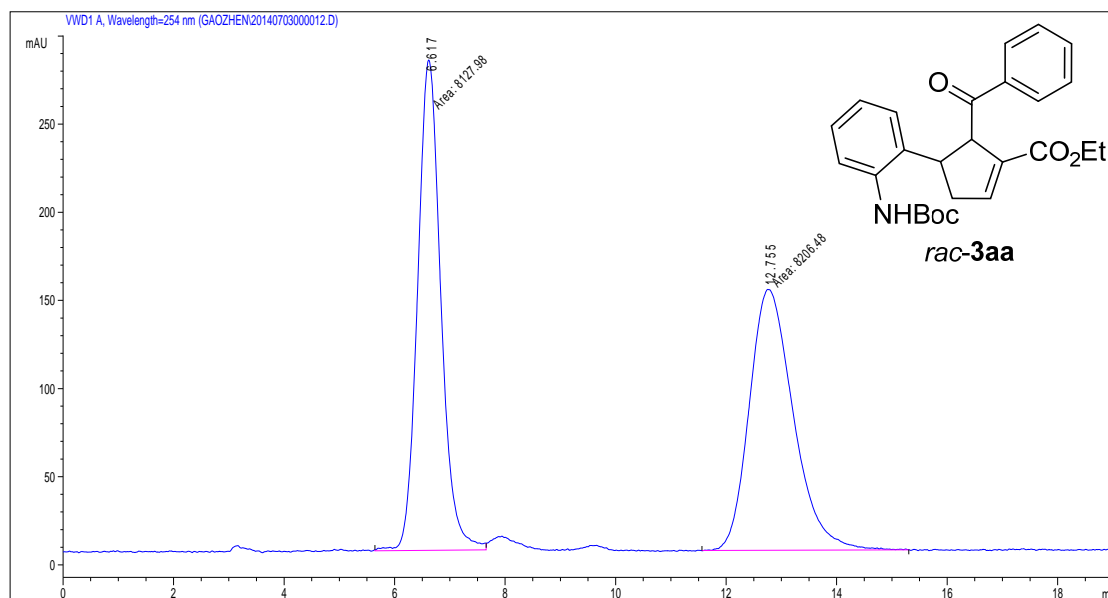

| # | Time   | Area   | Height | Width  | Area%  | Symmetry |
|---|--------|--------|--------|--------|--------|----------|
| 1 | 6.617  | 8128   | 278.1  | 0.4871 | 49.760 | 0.88     |
| 2 | 12.755 | 8206.5 | 148    | 0.9242 | 50.240 | 0.708    |

## HPLC chromatogram of chiral 3aa

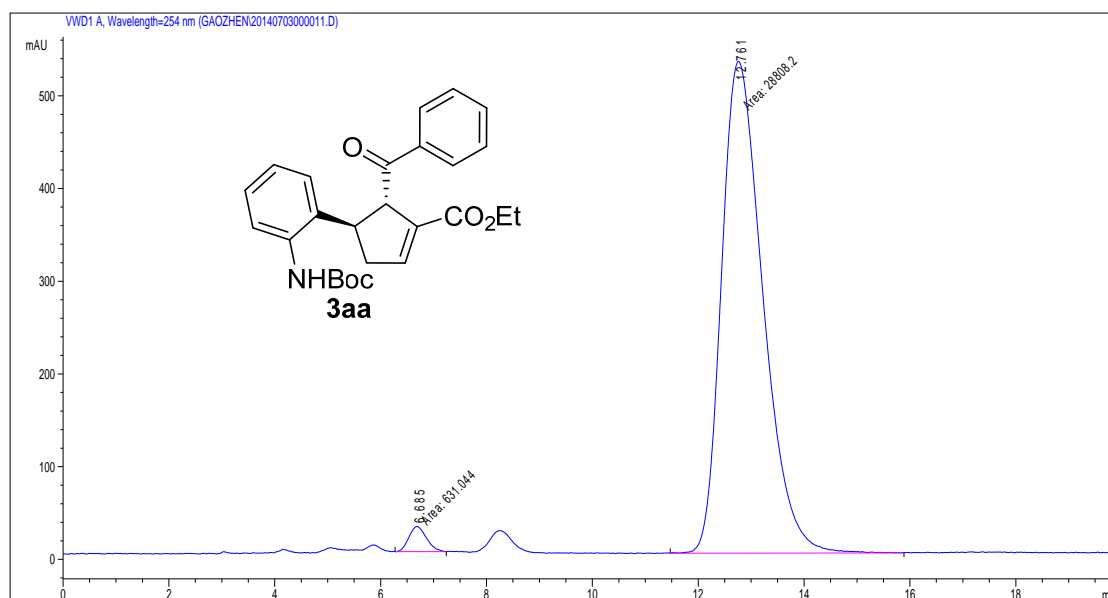

| # | Time   | Area    | Height | Width  | Area%  | Symmetry |
|---|--------|---------|--------|--------|--------|----------|
| 1 | 6.685  | 631     | 27.3   | 0.3856 | 2.144  | 0.819    |
| 2 | 12.761 | 28808.2 | 530.4  | 0.9052 | 96.156 | 0.67     |

### HPLC chromatogram of racemic 3ab

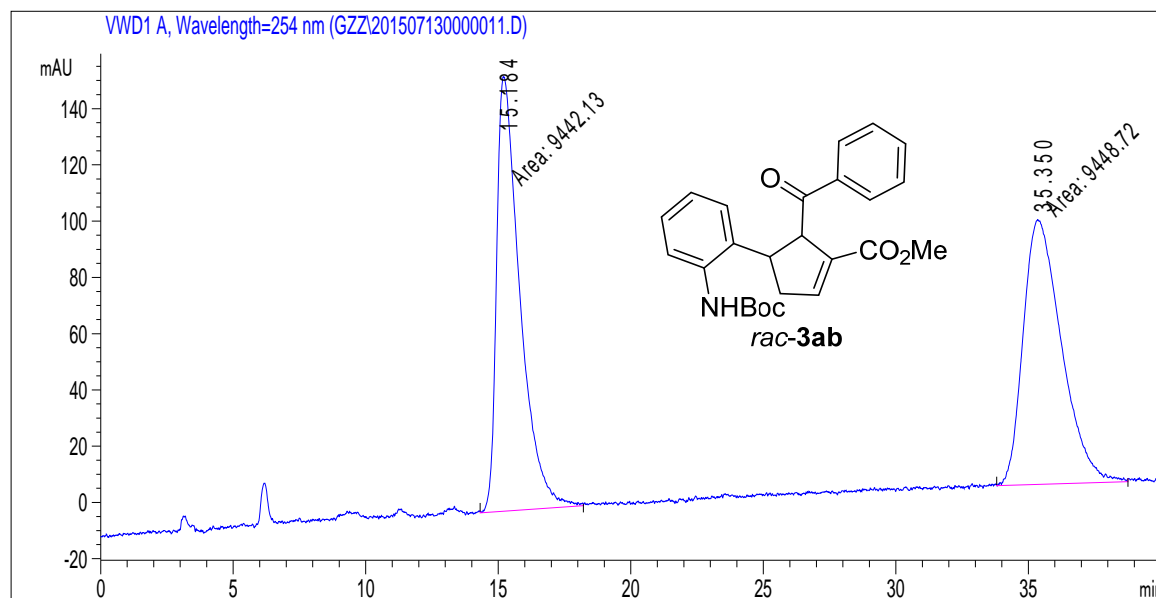

| # | Time  | Area   | Height | Width  | Area%  | Symmetry |
|---|-------|--------|--------|--------|--------|----------|
| 1 | 15.18 | 9442.1 | 154.5  | 1.0185 | 49.983 | 0.39     |
| 2 | 35.35 | 9448.7 | 94.2   | 1.6714 | 50.017 | 0.6      |

### HPLC chromatogram of chiral 3ab

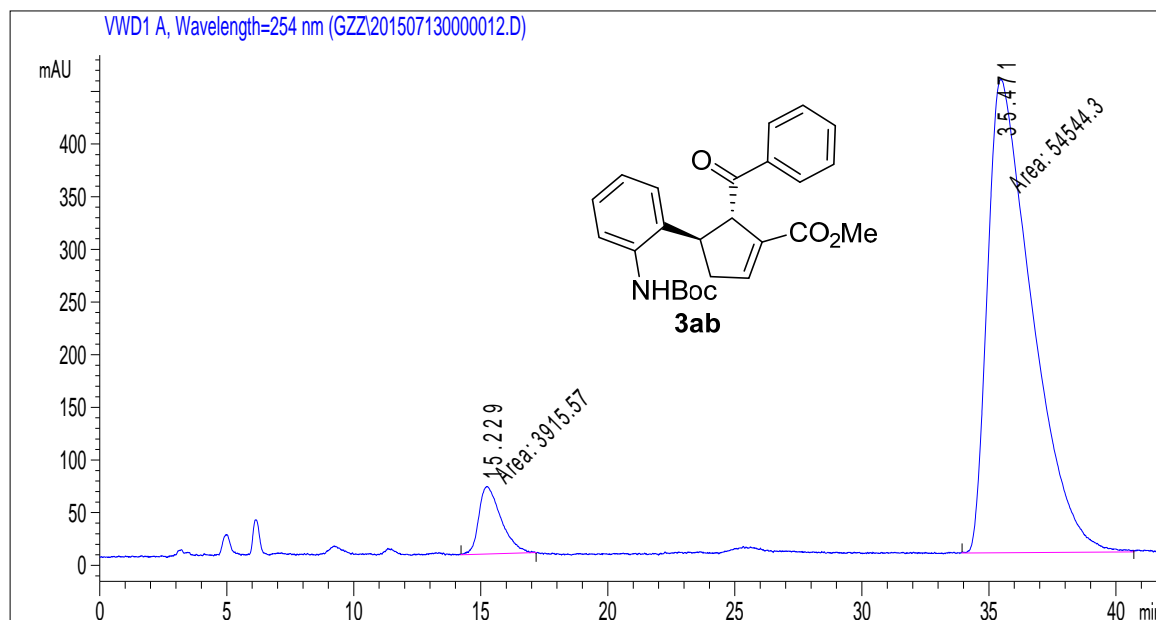

| # | Time   | Area    | Height | Width  | Area%  | Symmetry |
|---|--------|---------|--------|--------|--------|----------|
| 1 | 15.229 | 3915.6  | 64.2   | 1.016  | 4.098  | 0.547    |
| 2 | 35.471 | 54544.3 | 449.9  | 2.0206 | 95.902 | 0.421    |

## HPLC chromatogram of racemic 3ac

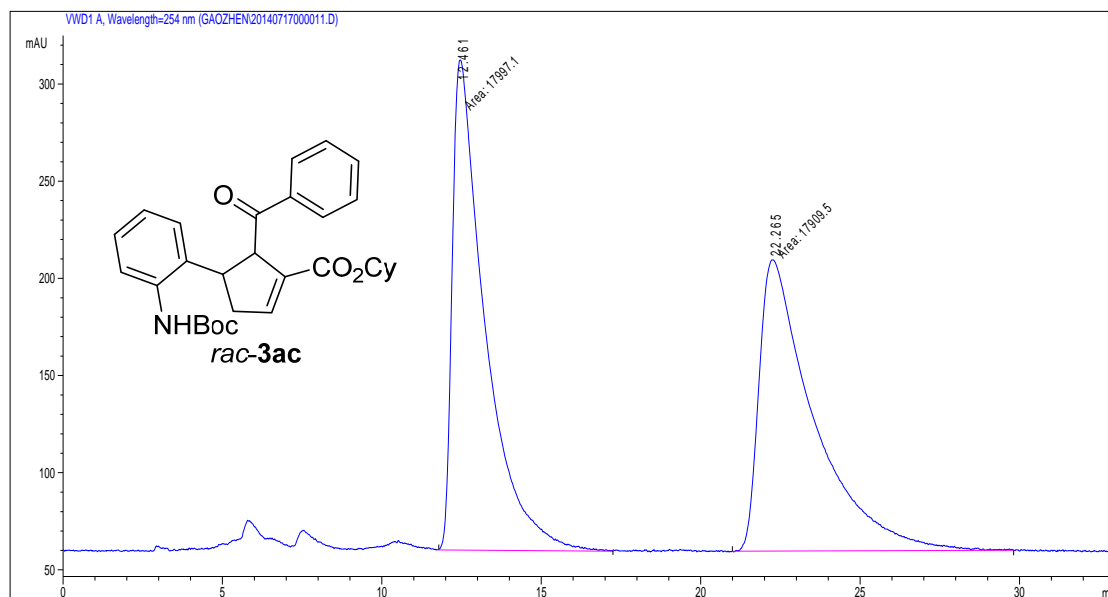

| # | Time   | Area    | Height | Width  | Area%  | Symmetry |
|---|--------|---------|--------|--------|--------|----------|
| 1 | 12.461 | 17997.1 | 252.2  | 1.1893 | 50.122 | 0.316    |
| 2 | 22.265 | 17909.5 | 149.9  | 1.9915 | 49.878 | 0.327    |

## HPLC chromatogram of chiral 3ac

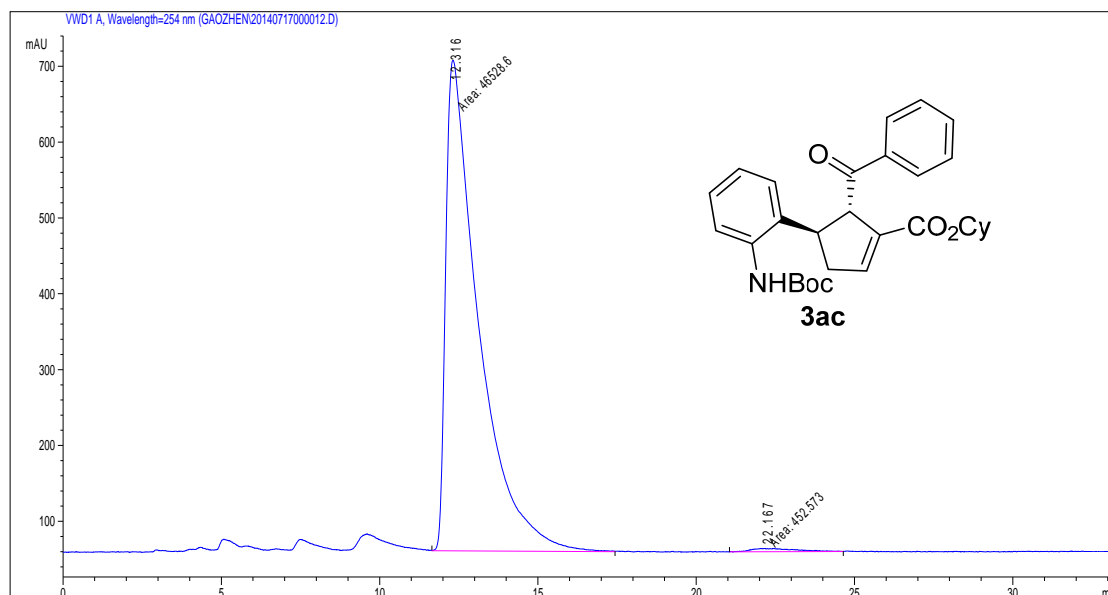

| # | Time   | Area    | Height | Width  | Area%  | Symmetry |
|---|--------|---------|--------|--------|--------|----------|
| 1 | 12.316 | 46528.6 | 646.8  | 1.1989 | 99.037 | 0.273    |
| 2 | 22.167 | 452.6   | 4.4    | 1.7141 | 0.963  | 0.451    |

## HPLC chromatogram of racemic 3bc

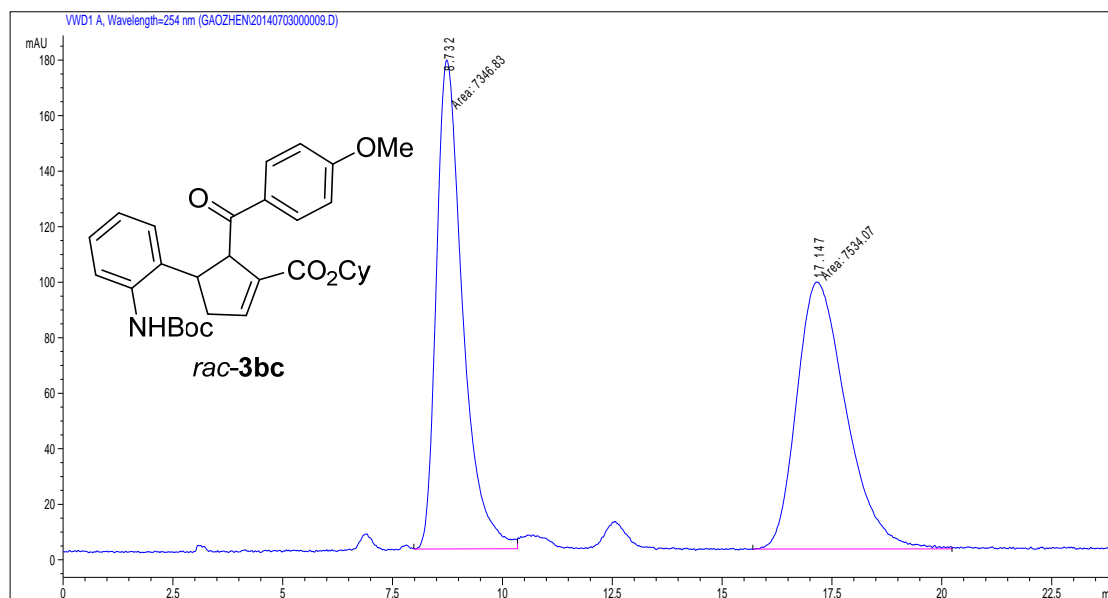

| # | Time   | Area   | Height | Width  | Area%  | Symmetry |
|---|--------|--------|--------|--------|--------|----------|
| 1 | 8.732  | 7346.8 | 176.1  | 0.6953 | 49.371 | 0.619    |
| 2 | 17.147 | 7534.1 | 96.2   | 1.3056 | 50.629 | 0.648    |

## HPLC chromatogram of chiral 3bc

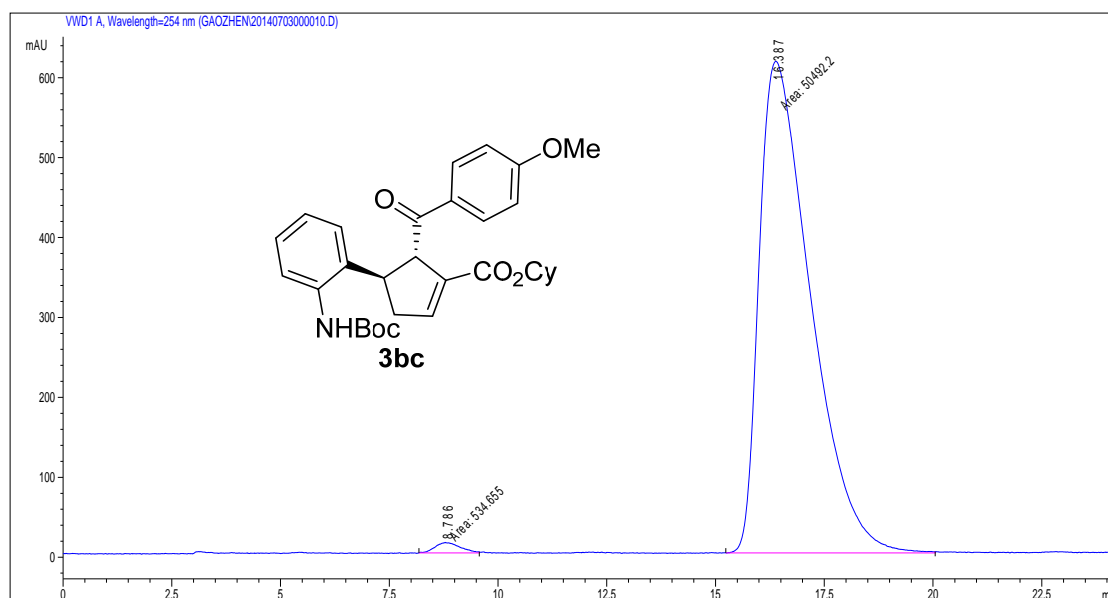

| # | Time   | Area    | Height | Width  | Area%  | Symmetry |
|---|--------|---------|--------|--------|--------|----------|
| 1 | 8.786  | 534.7   | 13.1   | 0.6811 | 1.048  | 0.674    |
| 2 | 16.387 | 50492.2 | 15.1   | 1.3681 | 98.952 | 0.464    |



## HPLC chromatogram of racemic 3cc

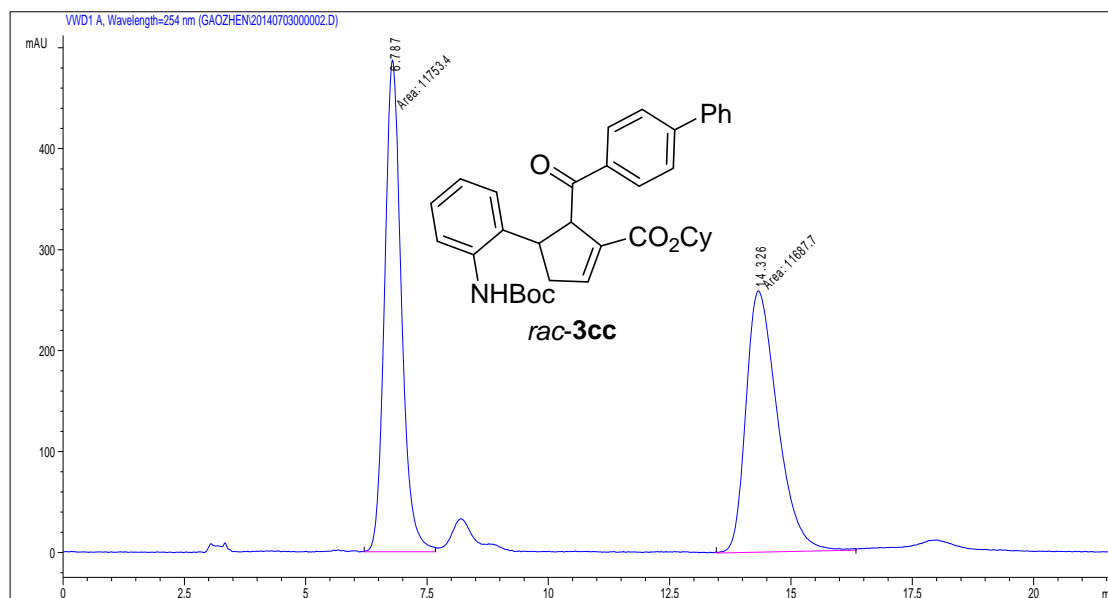

| # | Time   | Area    | Height | Width  | Area%  | Symmetry |
|---|--------|---------|--------|--------|--------|----------|
| 1 | 6.787  | 11842.6 | 488    | 0.3676 | 50.366 | 0.821    |
| 2 | 14.326 | 11670.6 | 259.2  | 0.6622 | 49.634 | 0.619    |

## HPLC chromatogram of chiral 3cc

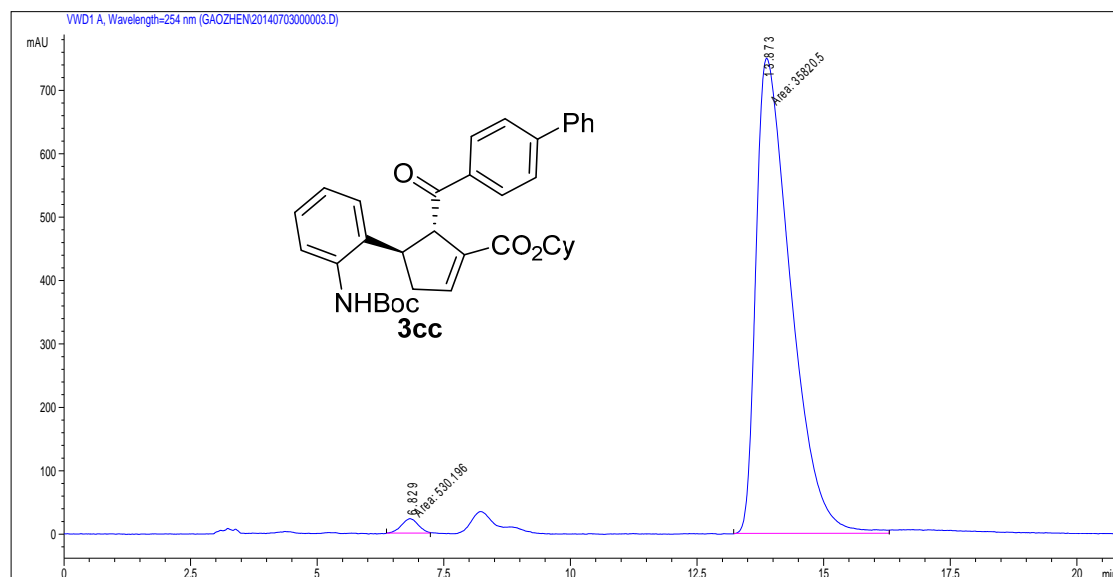

| # | Time   | Area    | Height | Width  | Area%  | Symmetry |
|---|--------|---------|--------|--------|--------|----------|
| 1 | 6.829  | 530.2   | 22.9   | 0.3851 | 1.459  | 0.982    |
| 2 | 13.873 | 35820.5 | 749.4  | 0.7967 | 98.541 | 0.428    |

## HPLC chromatogram of racemic 3dc

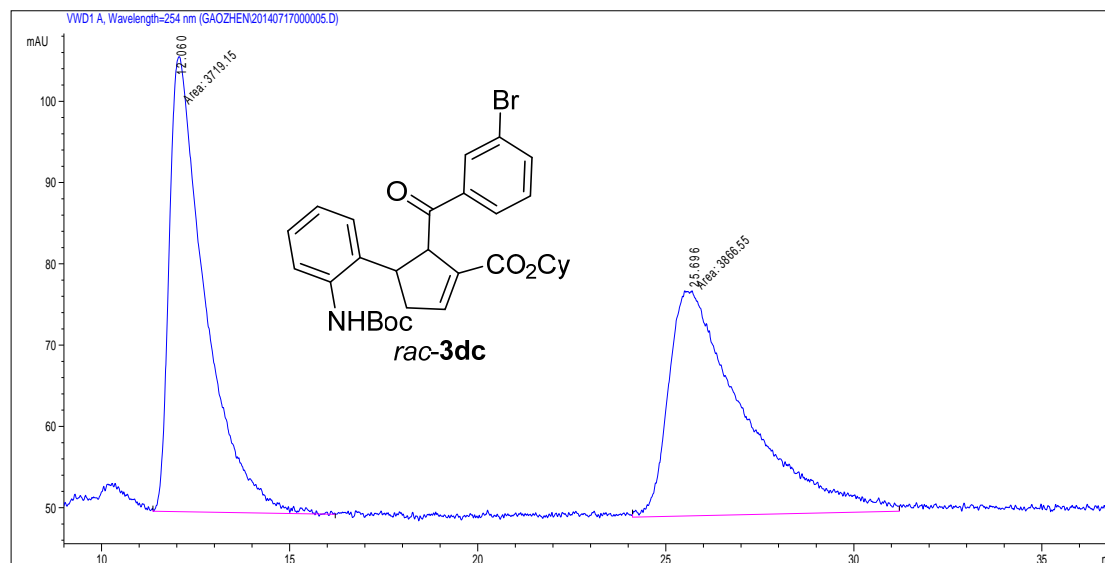

| # | Time  | Area   | Height | Width  | Area%  | Symmetry |
|---|-------|--------|--------|--------|--------|----------|
| 1 | 12.06 | 3719.1 | 56     | 1.1072 | 49.028 | 0.369    |
| 2 | 25.70 | 3866.5 | 27.7   | 2.3268 | 50.972 | 0.43     |

## HPLC chromatogram of chiral 3dc

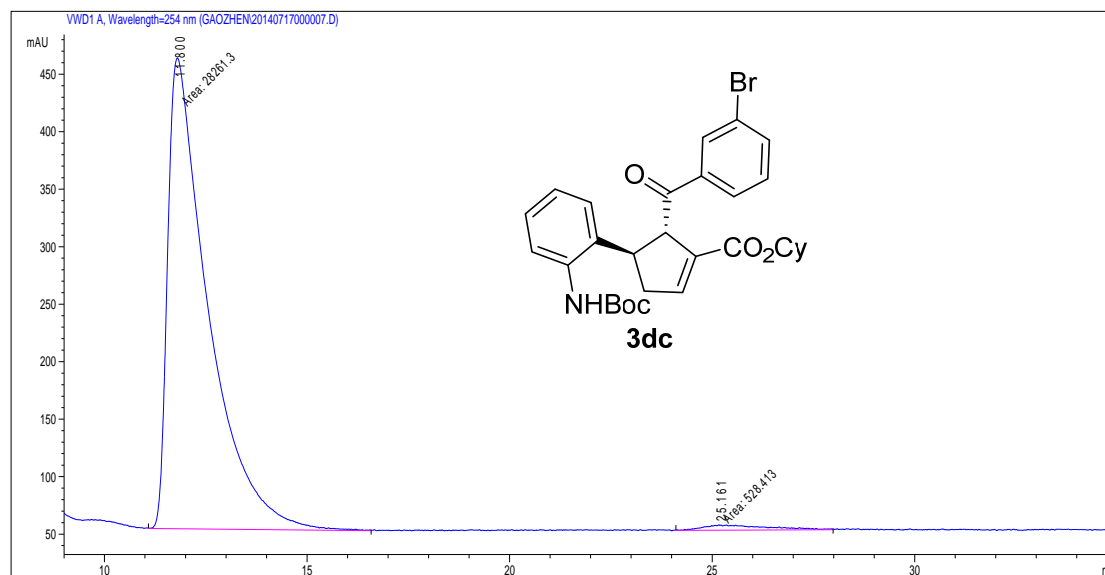

| # | Time   | Area    | Height | Width  | Area%  | Symmetry |
|---|--------|---------|--------|--------|--------|----------|
| 1 | 11.8   | 28261.3 | 409.3  | 1.1507 | 98.165 | 0.309    |
| 2 | 25.161 | 528.4   | 4.7    | 1.8696 | 1.835  | 0.333    |

## HPLC chromatogram of racemic 3ec

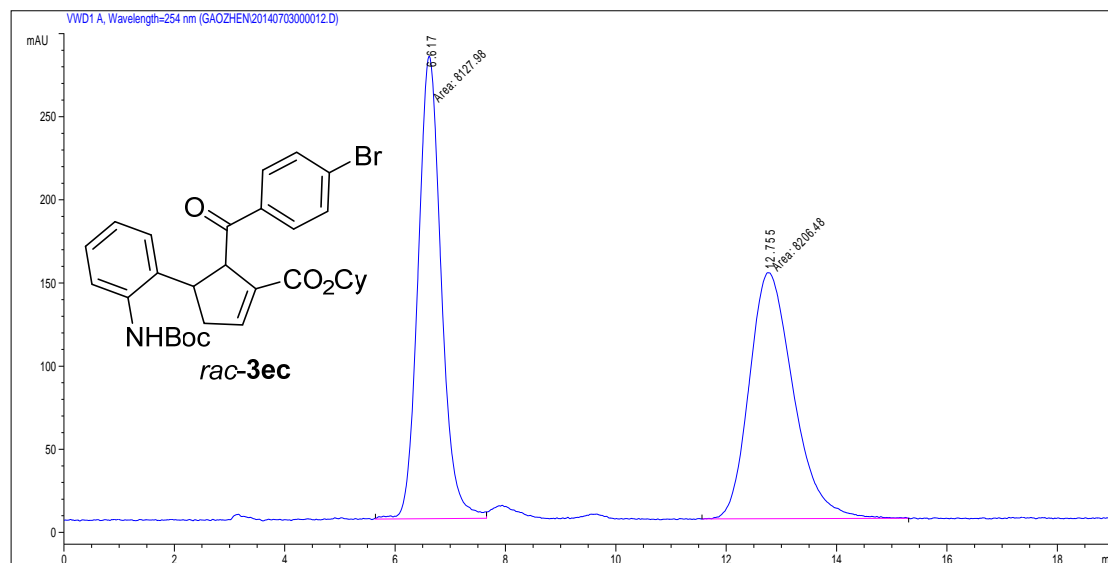

| # | Time   | Area   | Height | Width  | Area%  | Symmetry |
|---|--------|--------|--------|--------|--------|----------|
| 1 | 6.617  | 8128   | 278.1  | 0.4871 | 49.760 | 0.88     |
| 2 | 12.755 | 8206.5 | 148    | 0.9242 | 50.240 | 0.708    |

## HPLC chromatogram of chiral 3ec

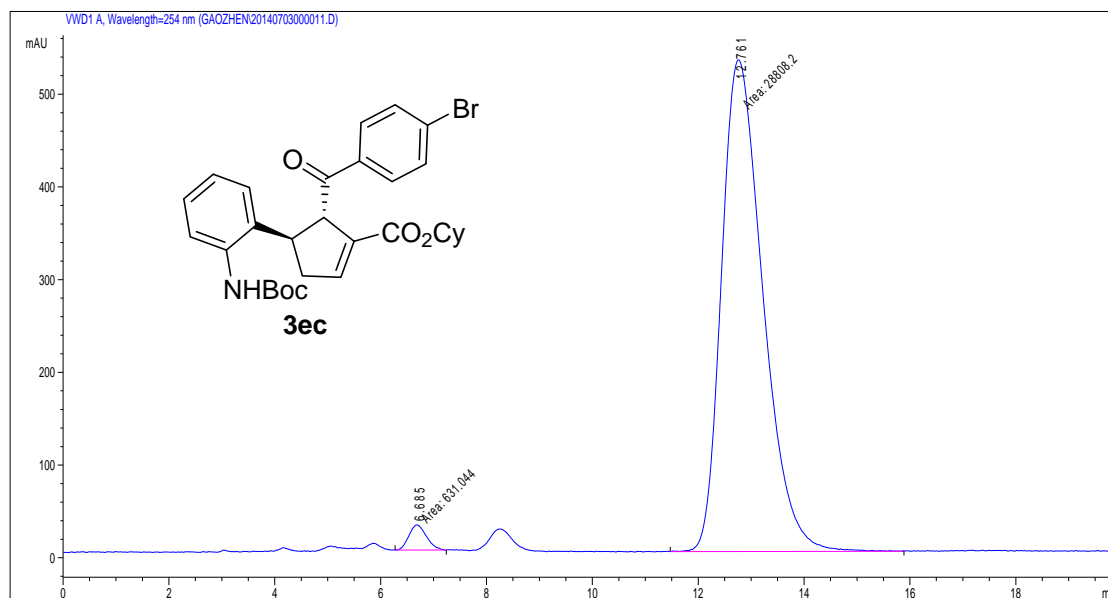

| # | Time   | Area    | Height | Width  | Area%  | Symmetry |
|---|--------|---------|--------|--------|--------|----------|
| 1 | 6.685  | 631     | 27.3   | 0.3856 | 2.144  | 0.819    |
| 2 | 12.761 | 28808.2 | 530.4  | 0.9052 | 97.856 | 0.67     |

### HPLC chromatogram of racemic 3fc

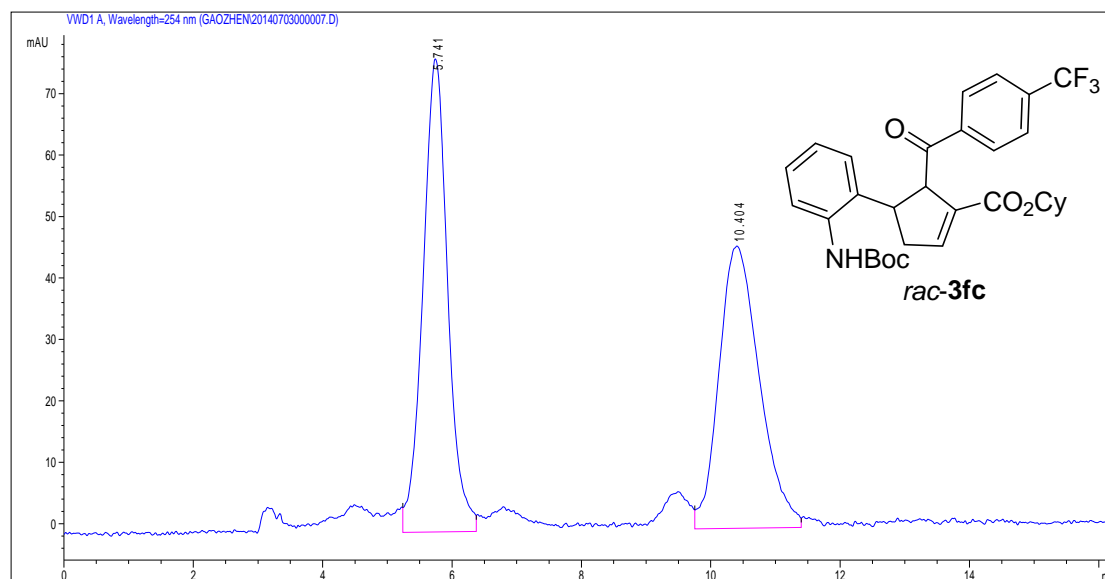

| # | Time   | Area   | Height | Width  | Area%  | Symmetry |
|---|--------|--------|--------|--------|--------|----------|
| 1 | 5.741  | 2048.4 | 77     | 0.4006 | 50.656 | 0.943    |
| 2 | 10.404 | 1995.4 | 45.9   | 0.5315 | 49.344 | 0.785    |

### HPLC chromatogram of chiral 3fc

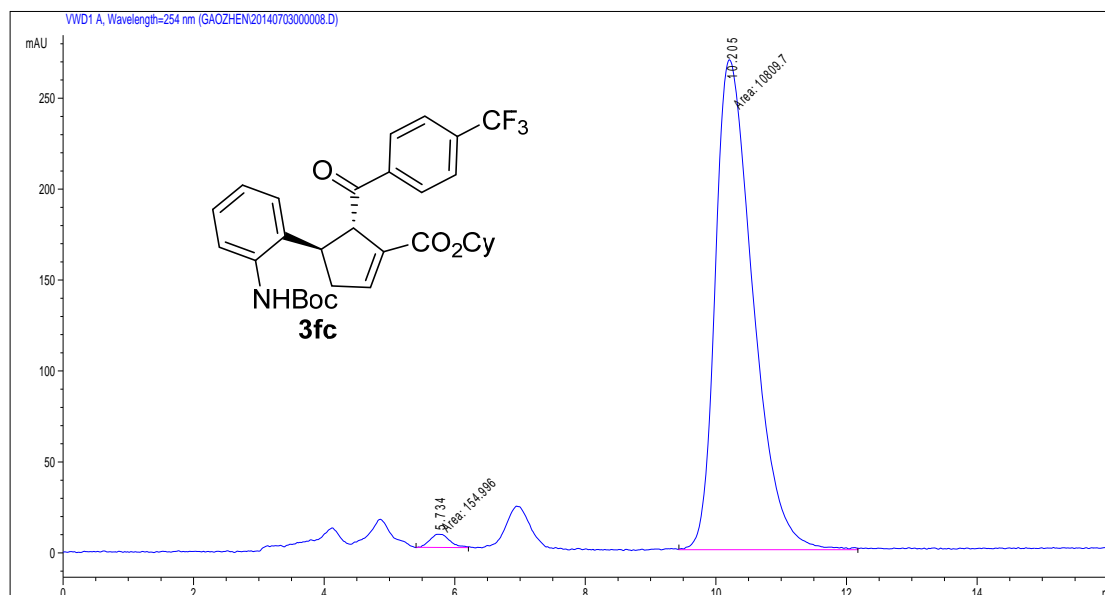

| # | Time   | Area    | Height | Width  | Area%  | Symmetry |
|---|--------|---------|--------|--------|--------|----------|
| 1 | 5.734  | 155     | 7.3    | 0.3545 | 1.414  | 0.623    |
| 2 | 10.205 | 10809.7 | 269.4  | 0.6688 | 98.586 | 0.575    |

## HPLC chromatogram of racemic 3gc

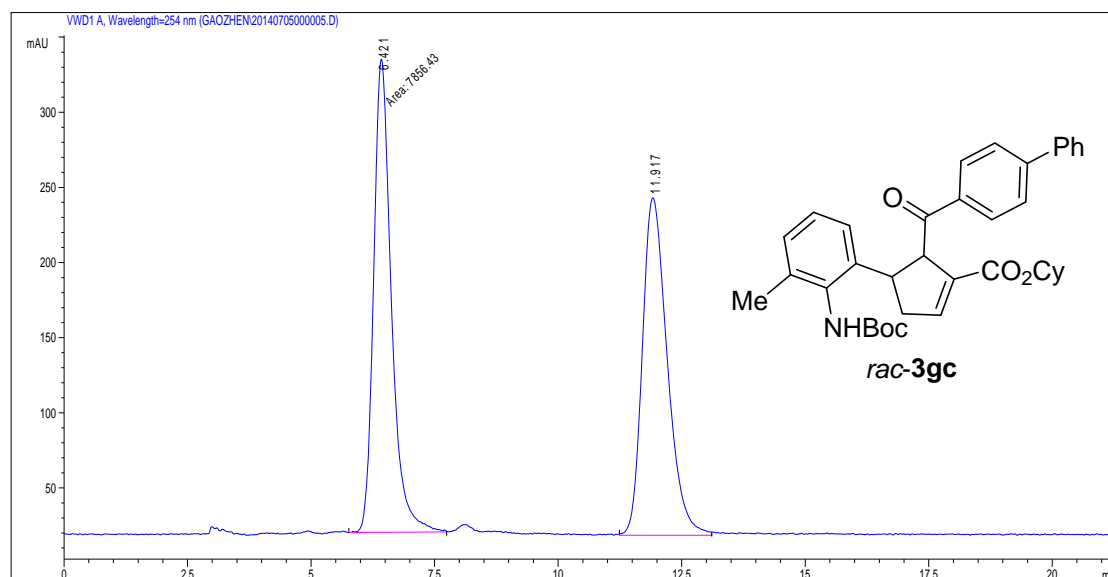

| # | Time   | Area   | Height | Width  | Area%  | Symmetry |
|---|--------|--------|--------|--------|--------|----------|
| 1 | 6.421  | 7856.4 | 314.9  | 0.4158 | 49.994 | 0.729    |
| 2 | 11.917 | 7858.4 | 224.7  | 0.526  | 50.006 | 0.693    |

## HPLC chromatogram of chiral 3gc

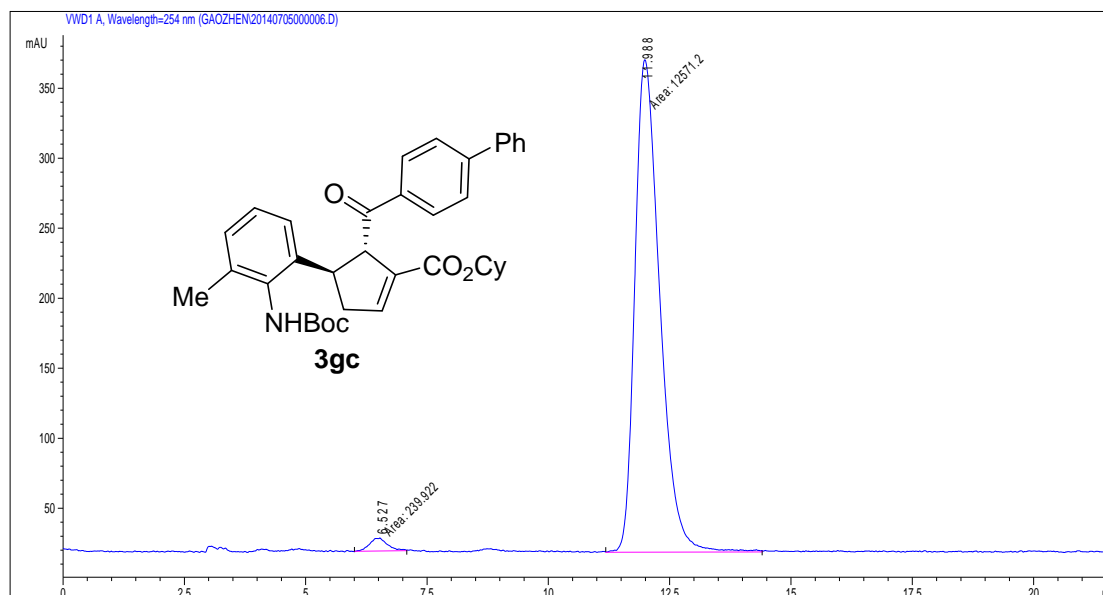

| # | Time   | Area    | Height | Width  | Area%  | Symmetry |
|---|--------|---------|--------|--------|--------|----------|
| 1 | 6.527  | 239.9   | 9.3    | 0.4318 | 1.473  | 1.227    |
| 2 | 11.988 | 12571.2 | 351.7  | 0.5957 | 98.527 | 0.638    |

## HPLC chromatogram of racemic 3hc

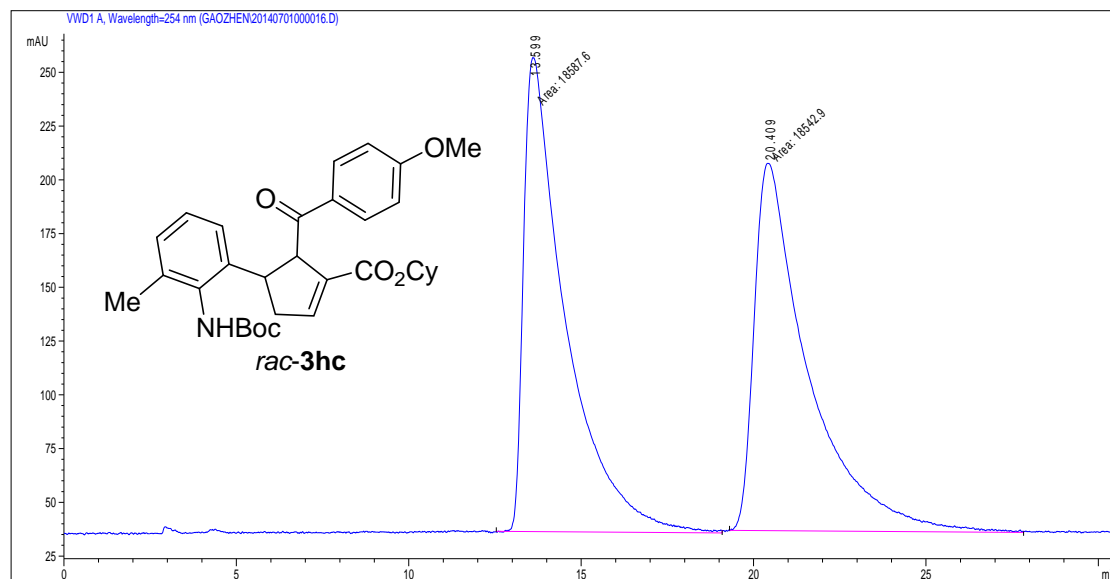

| # | Time   | Area    | Height | Width  | Area%  | Symmetry |
|---|--------|---------|--------|--------|--------|----------|
| 1 | 13.599 | 18587.6 | 220.5  | 1.4048 | 50.060 | 0.279    |
| 2 | 20.409 | 18542.9 | 170.9  | 1.8081 | 49.940 | 0.326    |

## HPLC chromatogram of chiral 3hc

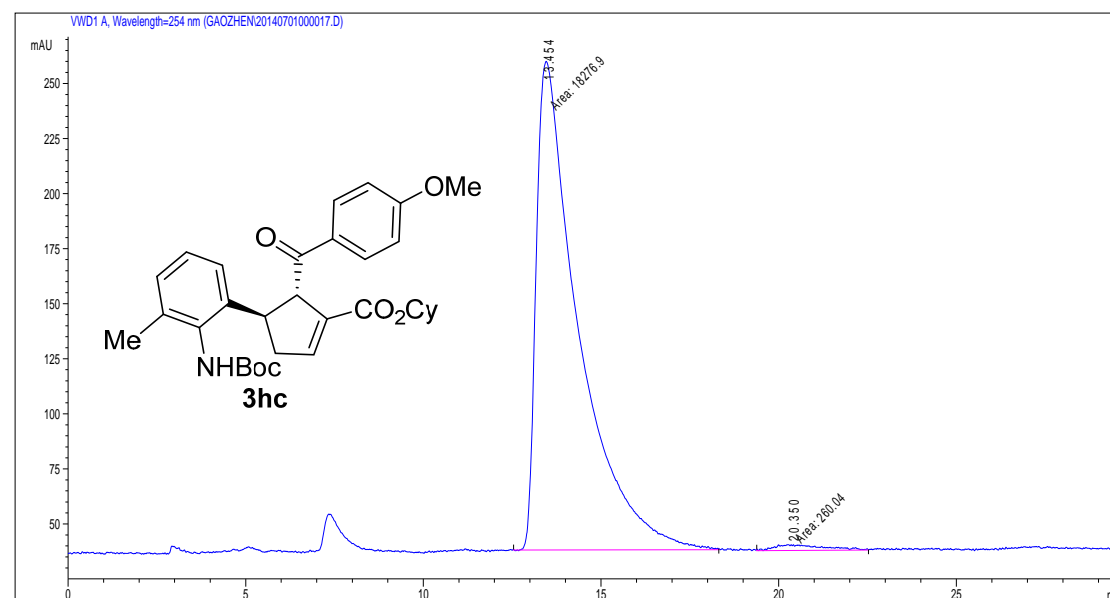

| # | Time   | Area    | Height | Width  | Area%  | Symmetry |
|---|--------|---------|--------|--------|--------|----------|
| 1 | 13.454 | 18276.9 | 221.9  | 1.3727 | 98.597 | 0.294    |
| 2 | 20.35  | 260.26  | 1.6507 | 1.403  | 0.488  |          |

## HPLC chromatogram of racemic 3ic

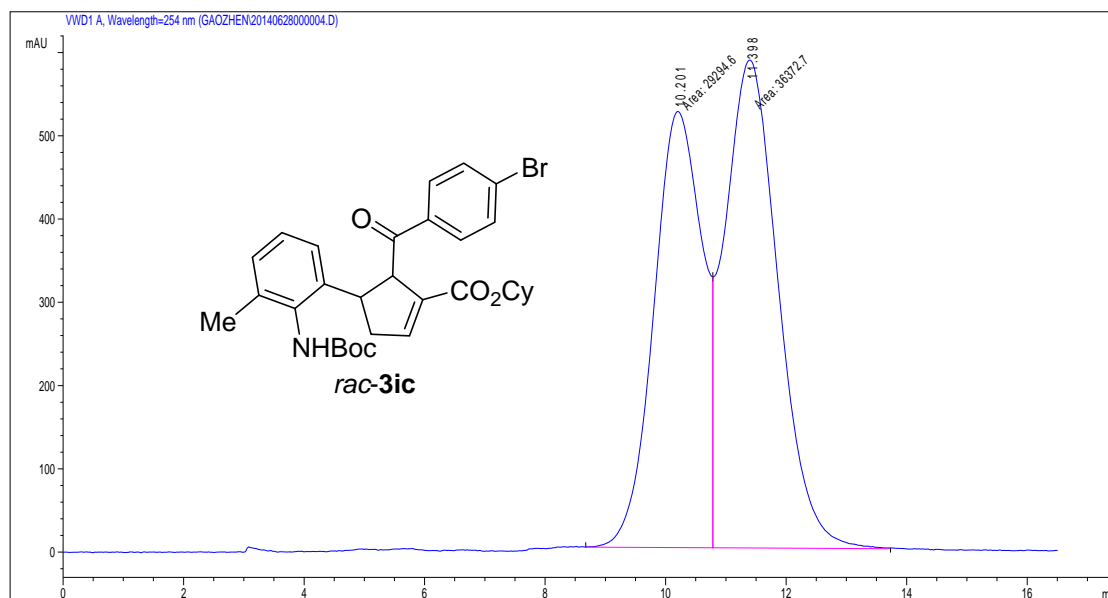

| # | Time   | Area    | Height | Width  | Area%  | Symmetry |
|---|--------|---------|--------|--------|--------|----------|
| 1 | 10.201 | 29294.6 | 537.3  | 0.4311 | 49.634 | 0.998    |
| 2 | 11.398 | 36372.7 | 581.4  | 0.5621 | 50.366 | 0.692    |

## HPLC chromatogram of chiral 3ic

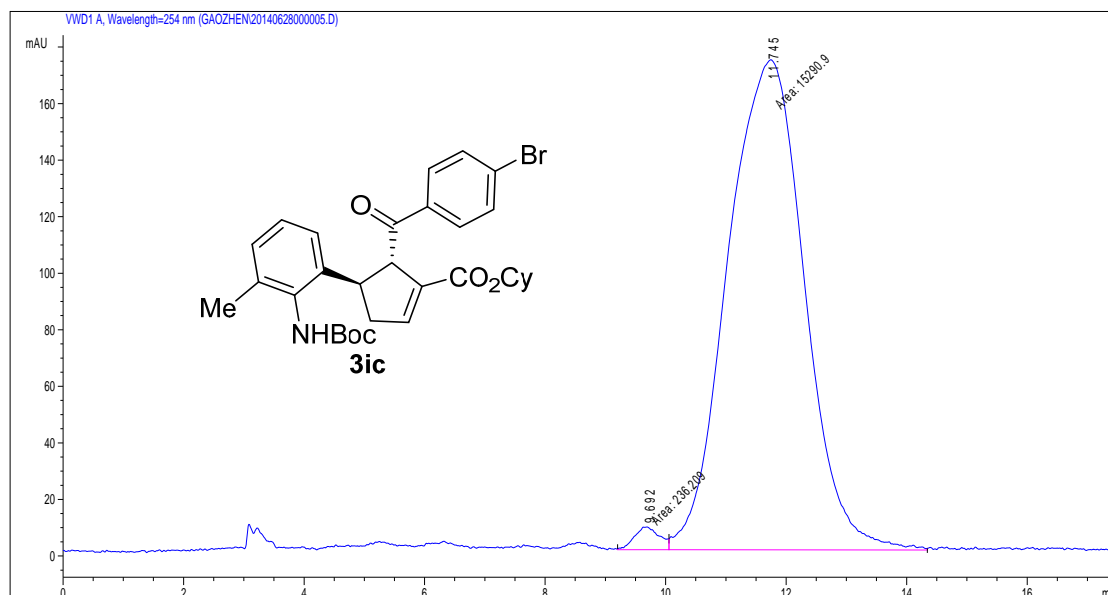

| # | Time   | Area    | Height | Width  | Area%  | Symmetry |
|---|--------|---------|--------|--------|--------|----------|
| 1 | 9.692  | 236.209 | 13.3   | 0.4622 | 1.521  | 0.971    |
| 2 | 11.745 | 15290.9 | 158.0  | 0.5784 | 98.479 | 0.473    |

## HPLC chromatogram of racemic 3jc

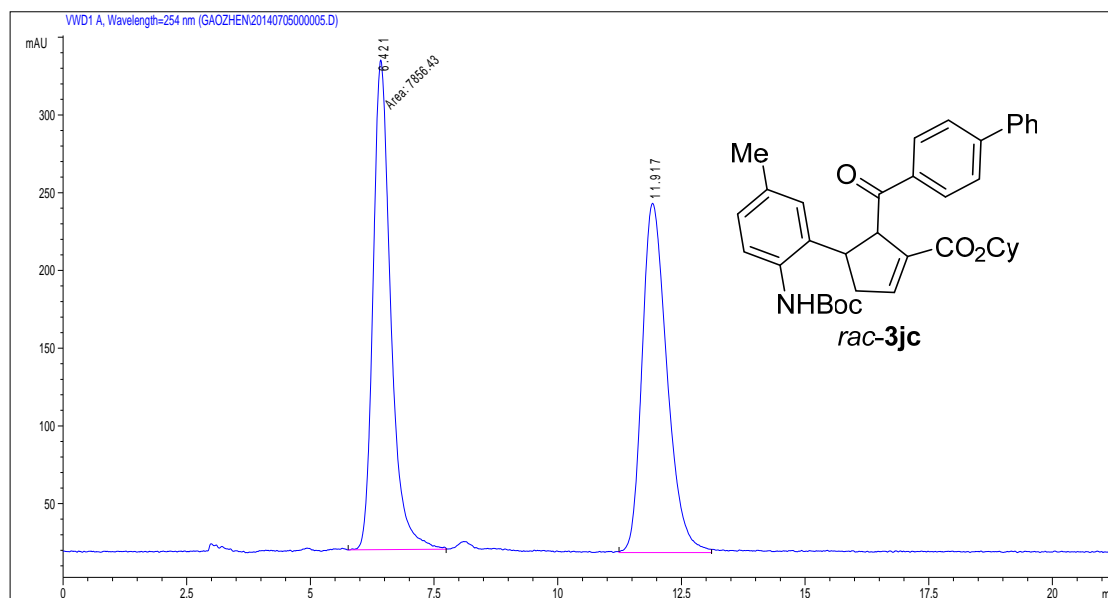

| # | Time   | Area   | Height | Width  | Area%  | Symmetry |
|---|--------|--------|--------|--------|--------|----------|
| 1 | 6.421  | 7856.4 | 314.9  | 0.4158 | 49.994 | 0.729    |
| 2 | 11.917 | 7858.4 | 224.7  | 0.526  | 50.006 | 0.693    |

## HPLC chromatogram of chiral 3jc

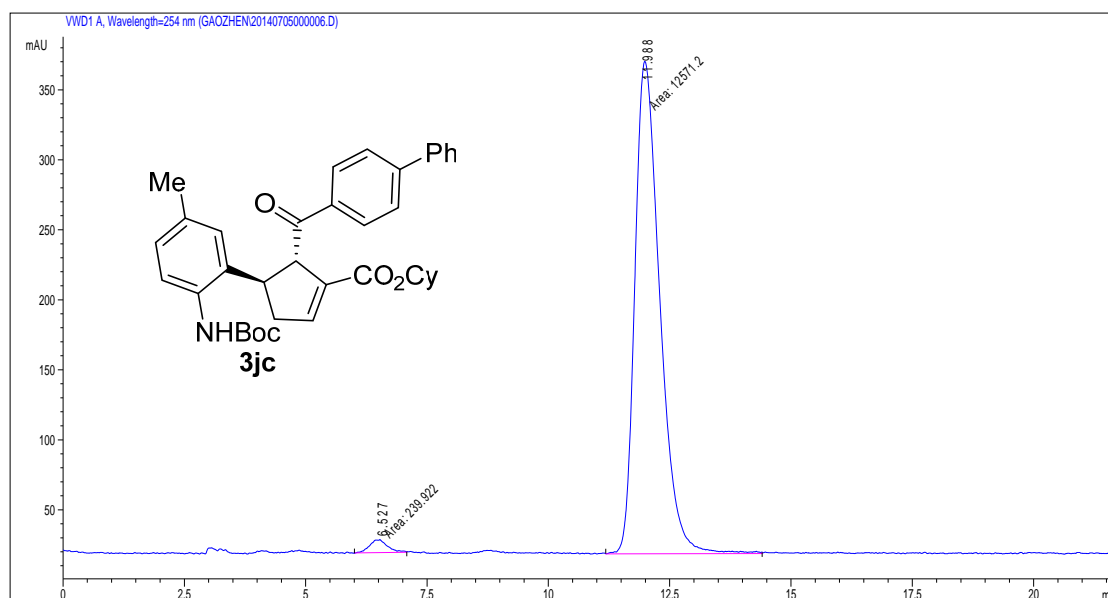

| # | Time   | Area    | Height | Width  | Area%  | Symmetry |
|---|--------|---------|--------|--------|--------|----------|
| 1 | 6.527  | 239.9   | 9.3    | 0.4318 | 1.873  | 1.227    |
| 2 | 11.988 | 12571.2 | 351.7  | 0.5957 | 98.127 | 0.638    |



## HPLC chromatogram of racemic 3kc

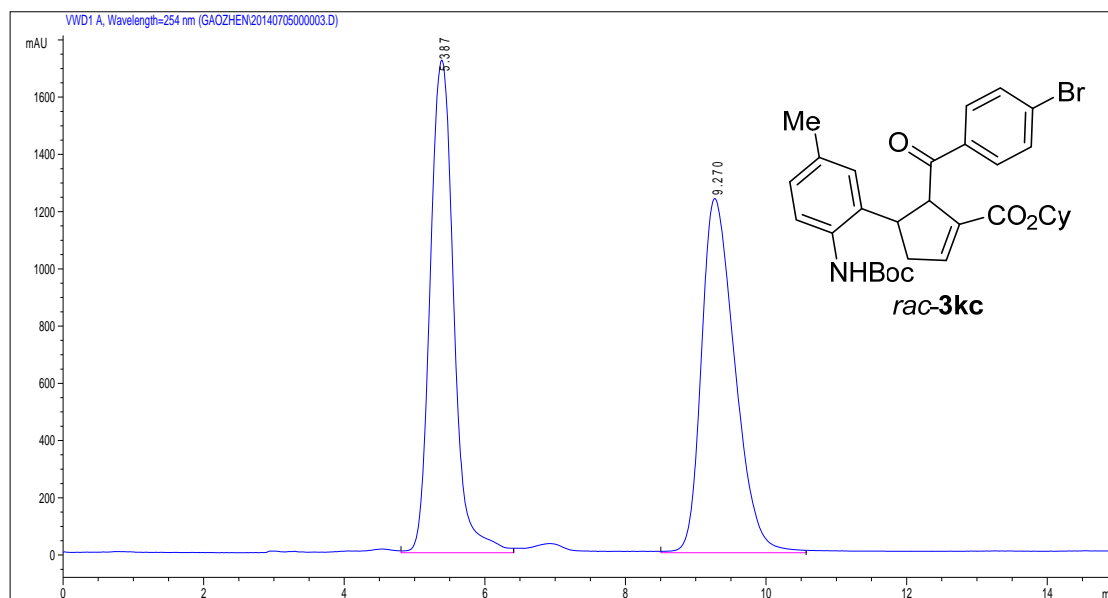

| # | Time  | Area    | Height | Width  | Area%  | Symmetry |
|---|-------|---------|--------|--------|--------|----------|
| 1 | 5.387 | 40091.6 | 1721.4 | 0.3649 | 49.547 | 0.886    |
| 2 | 9.27  | 40824.5 | 1237.6 | 0.5115 | 50.453 | 0.631    |

## HPLC chromatogram of chiral 3kc

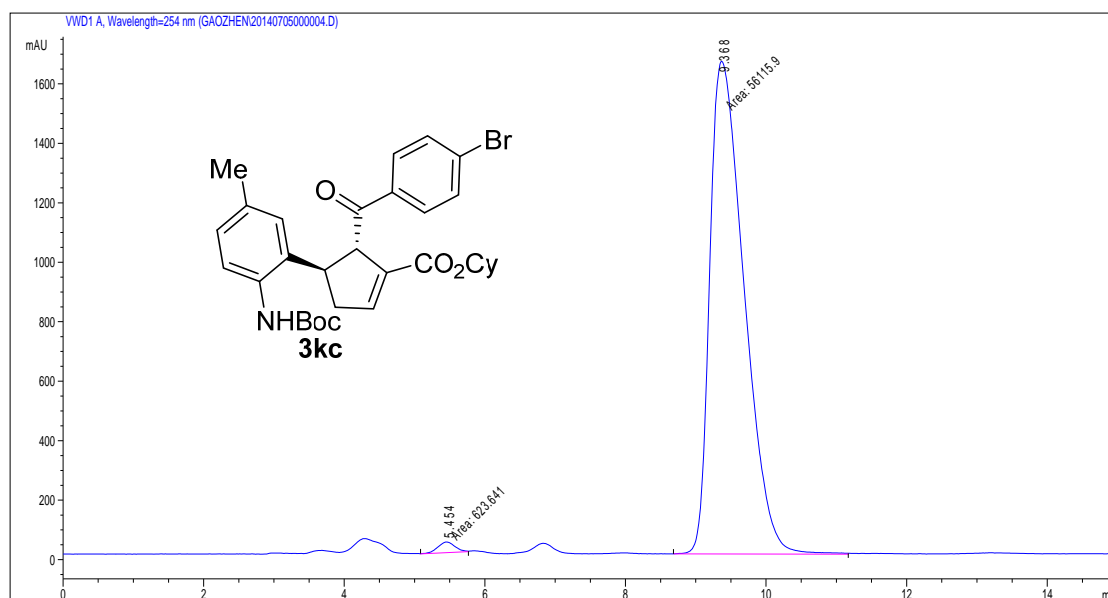

| # | Time  | Area    | Height | Width  | Area%  | Symmetry |
|---|-------|---------|--------|--------|--------|----------|
| 1 | 5.454 | 623.6   | 36.2   | 0.2873 | 1.099  | 1.026    |
| 2 | 9.368 | 56115.9 | 1656.3 | 0.5647 | 98.901 | 0.513    |

## HPLC chromatogram of racemic 3lc

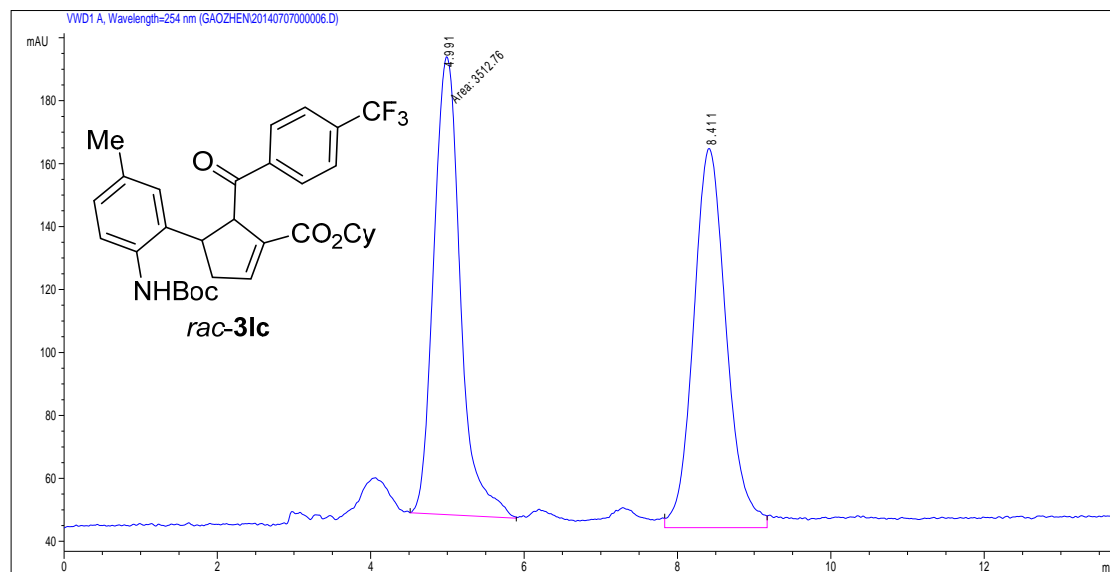

| # | Time  | Area   | Height | Width  | Area%  | Symmetry |
|---|-------|--------|--------|--------|--------|----------|
| 1 | 4.991 | 3512.8 | 145.5  | 0.4023 | 49.572 | 0.893    |
| 2 | 8.411 | 3573.4 | 120.5  | 0.4625 | 50.428 | 0.857    |

## HPLC chromatogram of chiral 3lc

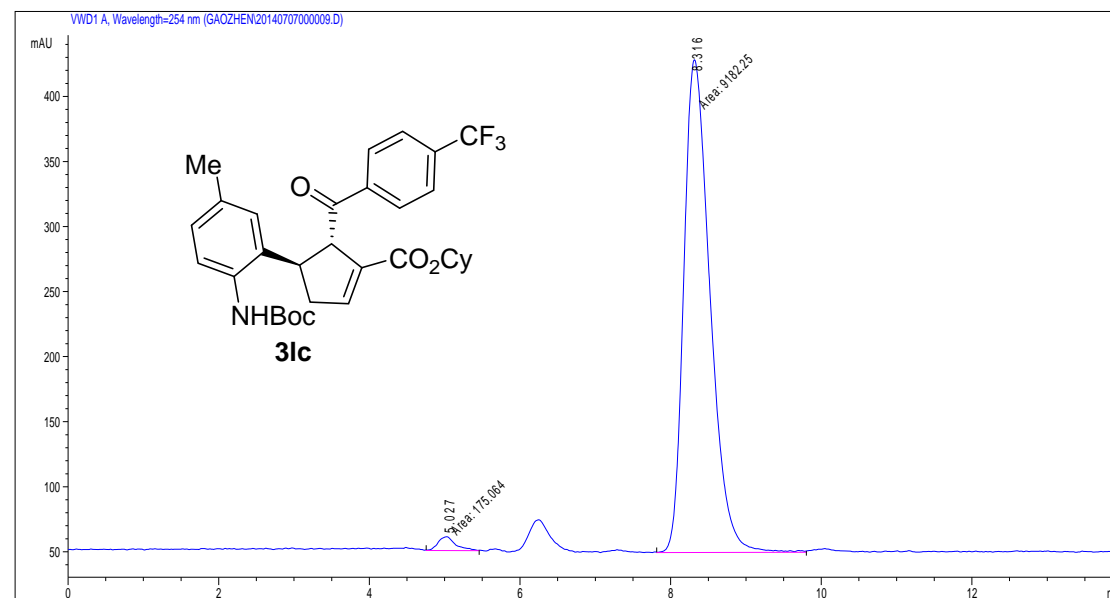

| # | Time  | Area   | Height | Width  | Area%  | Symmetry |
|---|-------|--------|--------|--------|--------|----------|
| 1 | 5.027 | 175.1  | 10.7   | 0.2737 | 1.871  | 0.901    |
| 2 | 8.316 | 9182.2 | 378.8  | 0.404  | 98.129 | 0.654    |

## HPLC chromatogram of racemic 3mc

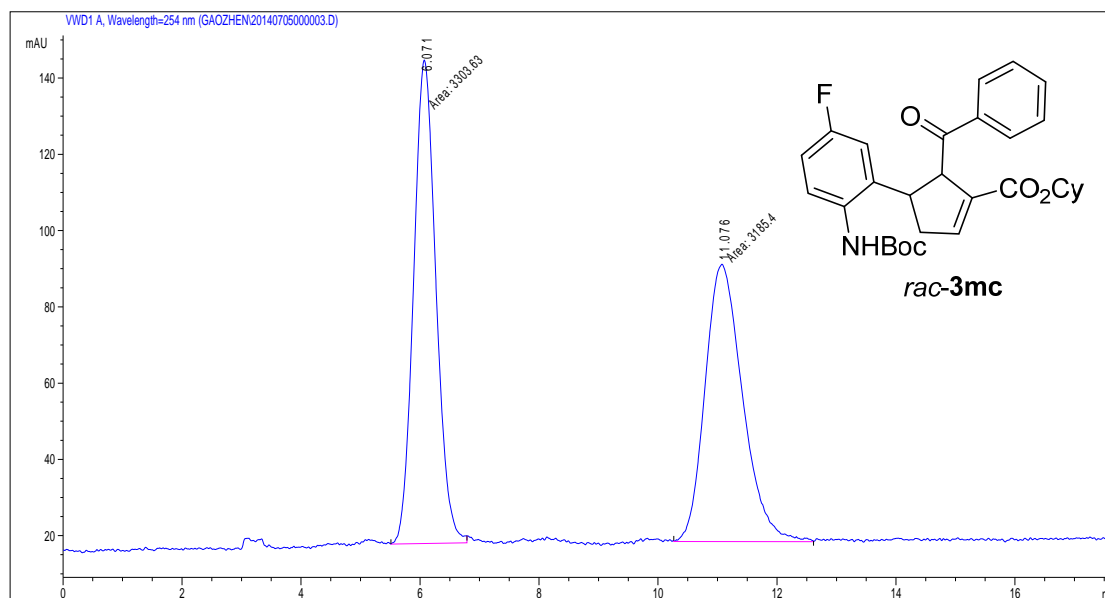

| # | Time   | Area   | Height | Width  | Area%  | Symmetry |
|---|--------|--------|--------|--------|--------|----------|
| 1 | 6.071  | 3303.6 | 126.8  | 0.4343 | 50.911 | 0.877    |
| 2 | 11.076 | 3185.4 | 72.7   | 0.7299 | 49.089 | 0.79     |

## HPLC chromatogram of chiral 3mc

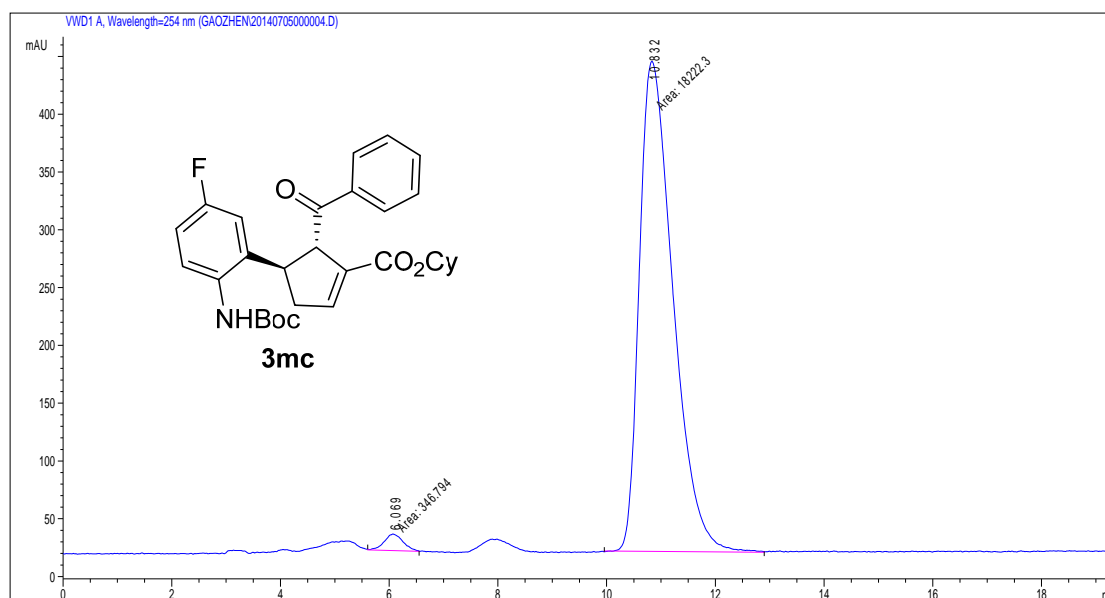

| # | Time   | Area    | Height | Width  | Area%  | Symmetry |
|---|--------|---------|--------|--------|--------|----------|
| 1 | 6.069  | 346.8   | 14.3   | 0.4034 | 1.868  | 0.855    |
| 2 | 10.832 | 18222.3 | 423.9  | 0.7165 | 98.132 | 0.568    |

## HPLC chromatogram of racemic 3nc

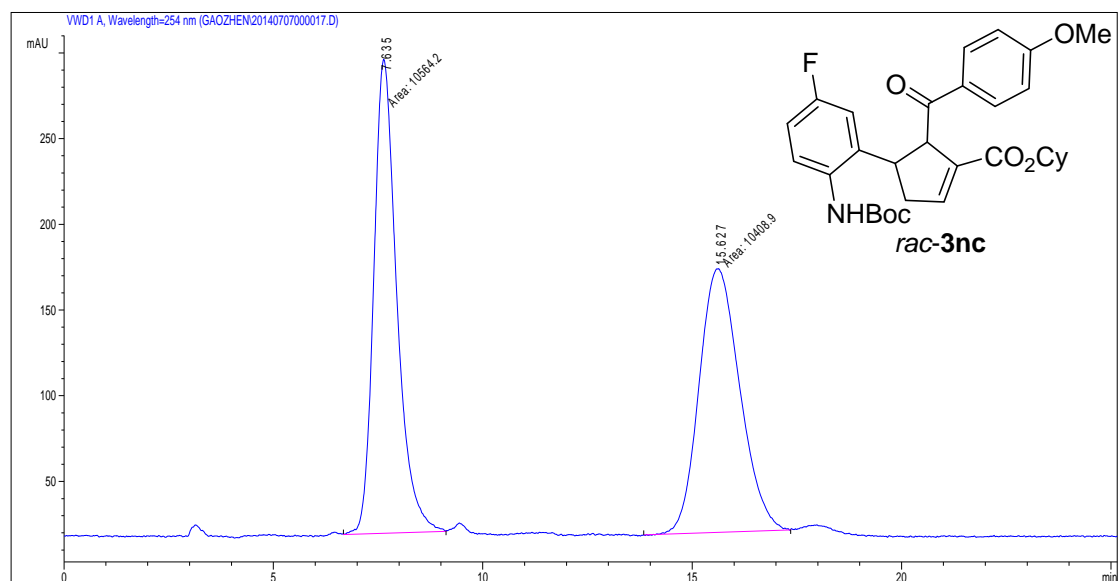

| # | Time   | Area    | Height | Width  | Area%  | Symmetry |
|---|--------|---------|--------|--------|--------|----------|
| 1 | 7.635  | 10564.2 | 276.5  | 0.6368 | 50.370 | 0.737    |
| 2 | 15.627 | 10408.9 | 153.8  | 1.1278 | 49.630 | 0.875    |

## HPLC chromatogram of chiral 3nc

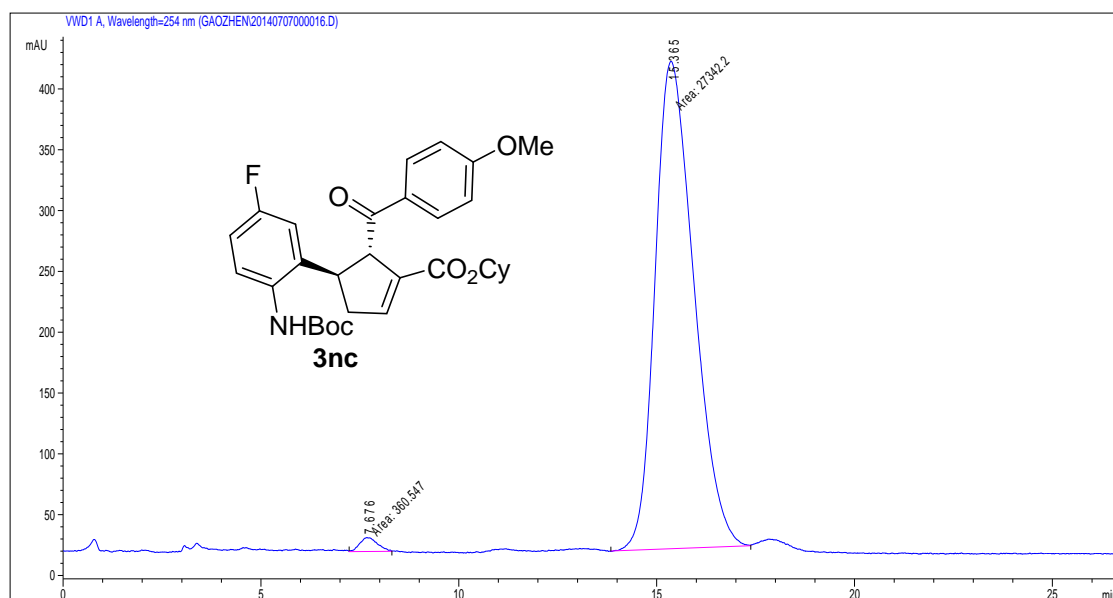

| # | Time   | Area    | Height | Width  | Area%  | Symmetry |
|---|--------|---------|--------|--------|--------|----------|
| 1 | 7.676  | 360.5   | 11.5   | 0.5236 | 1.301  | 0.669    |
| 2 | 15.365 | 27342.2 | 400.6  | 1.1375 | 98.699 | 0.689    |

## HPLC chromatogram of racemic 3oc

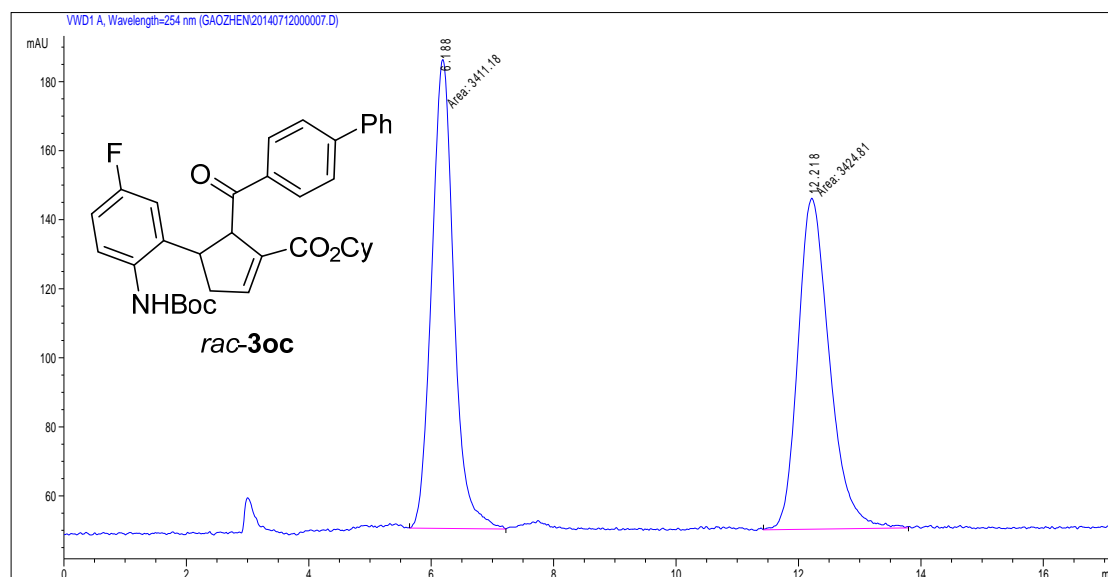

| # | Time   | Area   | Height | Width  | Area%  | Symmetry |
|---|--------|--------|--------|--------|--------|----------|
| 1 | 6.188  | 3411.2 | 135.8  | 0.4186 | 49.900 | 0.946    |
| 2 | 12.218 | 3424.8 | 95.9   | 0.5954 | 50.100 | 0.753    |

## HPLC chromatogram of chiral 3oc

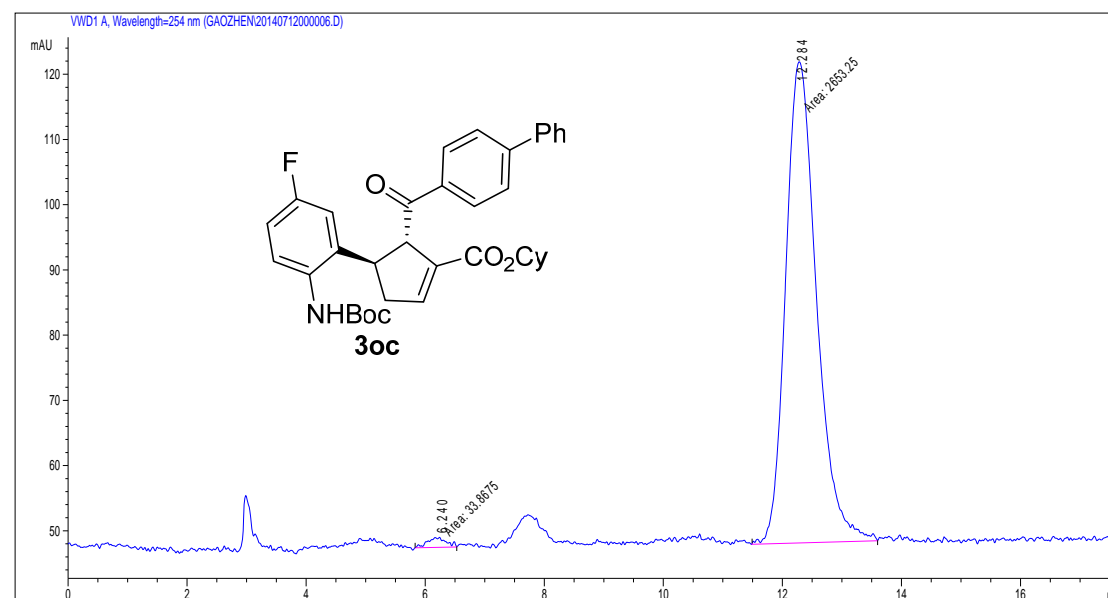

| # | Time   | Area   | Height | Width  | Area%  | Symmetry |
|---|--------|--------|--------|--------|--------|----------|
| 1 | 6.24   | 33.9   | 1.5    | 0.3669 | 1.260  | 1.57     |
| 2 | 12.284 | 2653.3 | 73.8   | 0.5994 | 98.740 | 0.762    |

## HPLC chromatogram of racemic 3pc

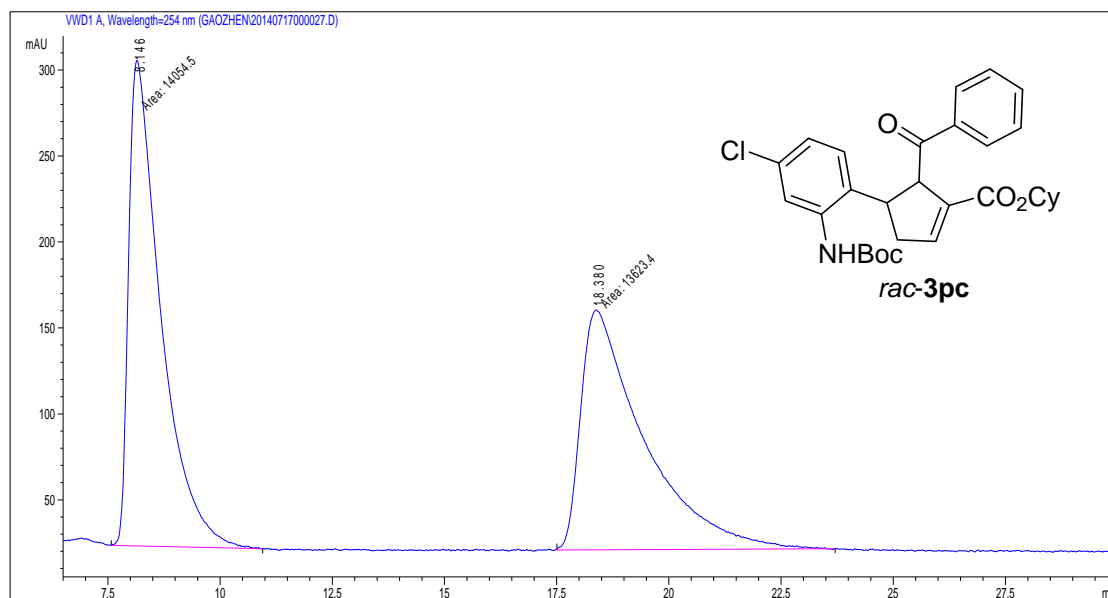

| # | Time  | Area    | Height | Width  | Area%  | Symmetry |
|---|-------|---------|--------|--------|--------|----------|
| 1 | 8.146 | 14054.5 | 282.5  | 0.8293 | 50.779 | 0.339    |
| 2 | 18.38 | 13623.4 | 139.5  | 1.6274 | 49.221 | 0.316    |

## HPLC chromatogram of chiral 3pc

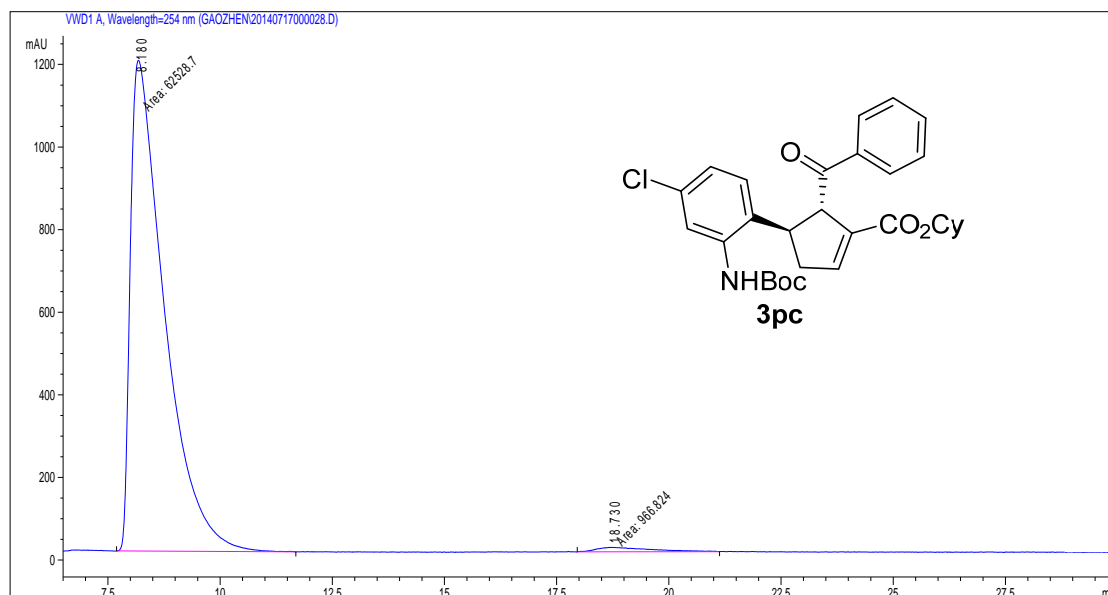

| # | Time  | Area    | Height | Width  | Area%  | Symmetry |
|---|-------|---------|--------|--------|--------|----------|
| 1 | 8.18  | 62528.7 | 1188.1 | 0.8771 | 98.477 | 0.302    |
| 2 | 18.73 | 966.8   | 11     | 1.4643 | 1.523  | 0.38     |

## HPLC chromatogram of racemic 3qc

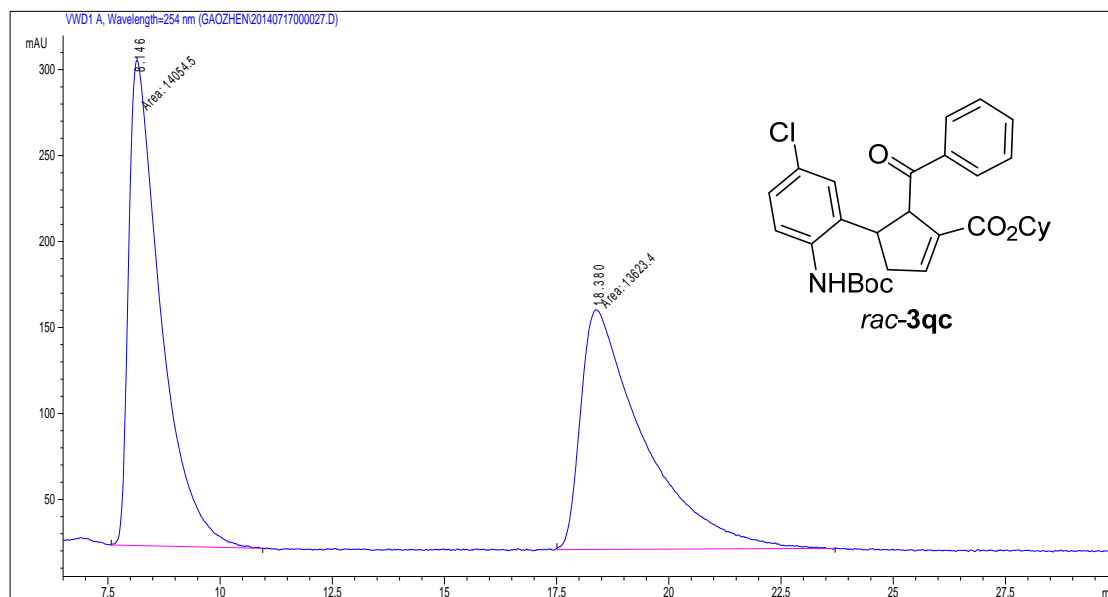

| # | Time  | Area    | Height | Width  | Area%  | Symmetry |
|---|-------|---------|--------|--------|--------|----------|
| 1 | 8.146 | 14054.5 | 282.5  | 0.8293 | 50.779 | 0.339    |
| 2 | 18.38 | 13623.4 | 139.5  | 1.6274 | 49.221 | 0.316    |

## HPLC chromatogram of chiral 3qc

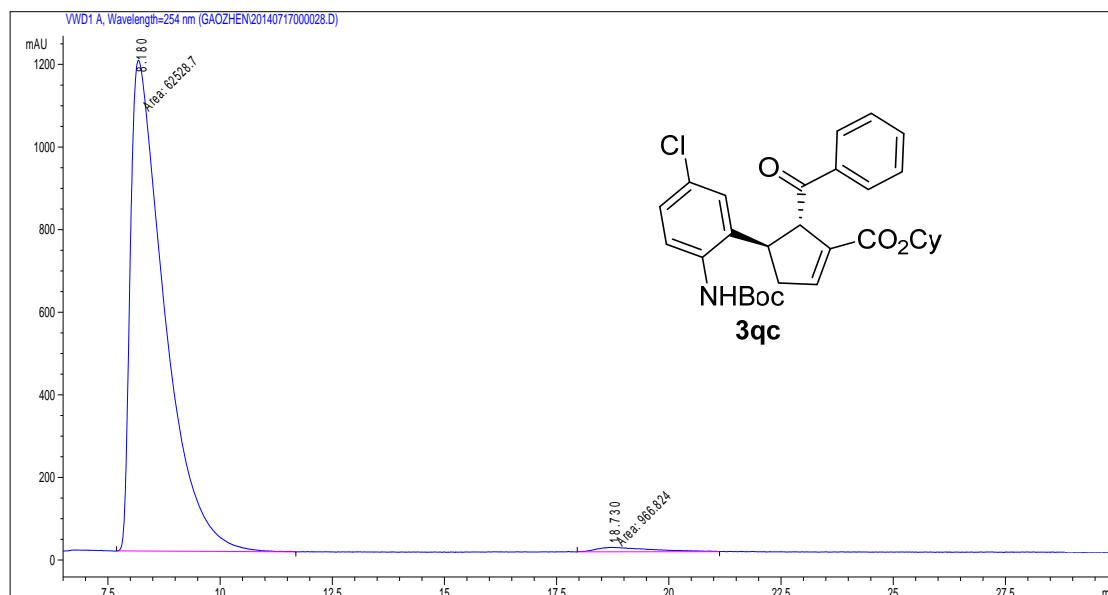

| # | Time  | Area    | Height | Width  | Area%  | Symmetry |
|---|-------|---------|--------|--------|--------|----------|
| 1 | 8.18  | 62528.7 | 1188.1 | 0.8771 | 98.477 | 0.302    |
| 2 | 18.73 | 966.8   | 11     | 1.4643 | 1.523  | 0.38     |

### HPLC chromatogram of racemic 3rc

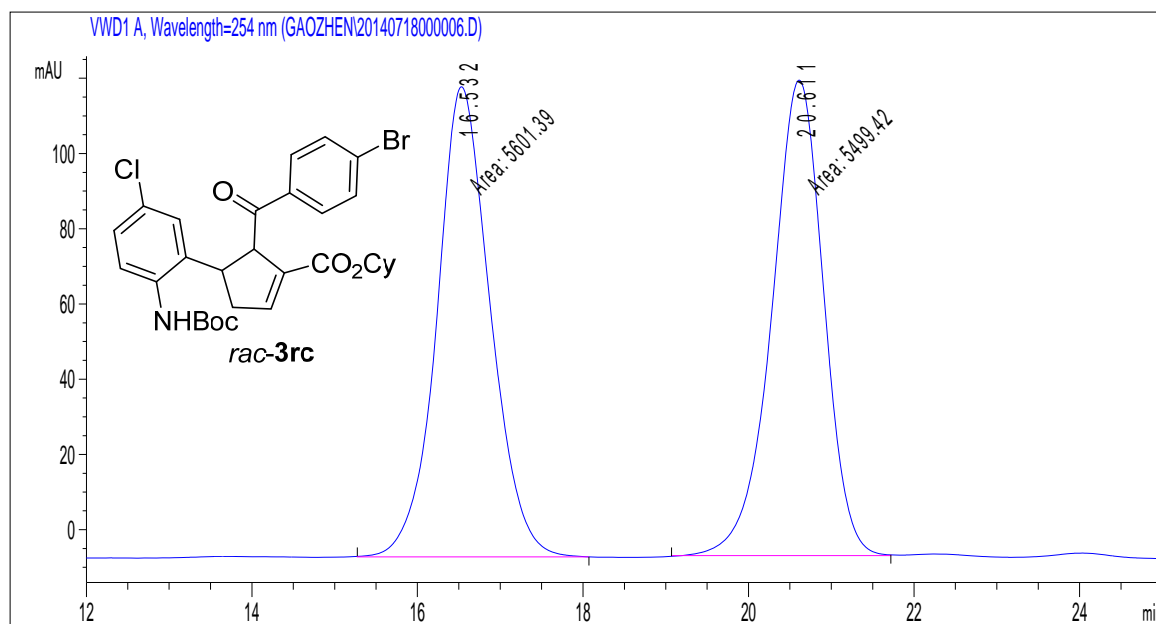

| # | Time   | Area   | Height | Width  | Area%  | Symmetry |
|---|--------|--------|--------|--------|--------|----------|
| 1 | 16.532 | 5601.4 | 125    | 0.7469 | 50.459 | 0.842    |
| 2 | 20.611 | 5499.4 | 126.4  | 0.7249 | 49.541 | 1.095    |

### HPLC chromatogram of chiral 3rc

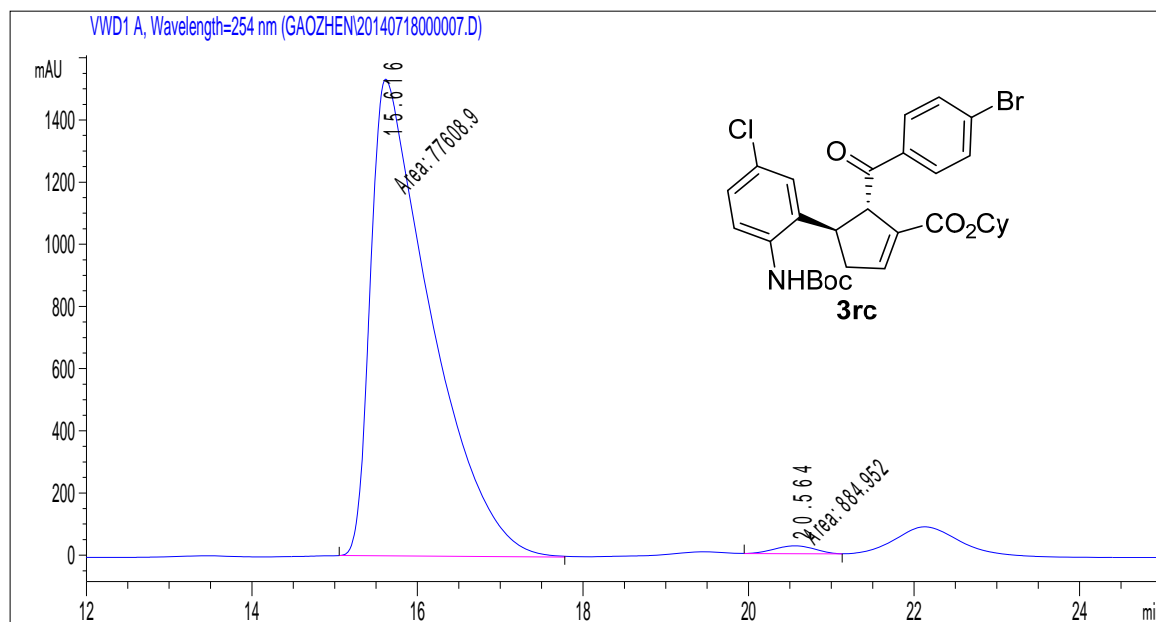

| # | Time   | Area    | Height | Width  | Area%  | Symmetry |
|---|--------|---------|--------|--------|--------|----------|
| 1 | 15.616 | 77608.9 | 1533.5 | 0.8435 | 98.873 | 0.329    |
| 2 | 20.564 | 885     | 25.7   | 0.5735 | 1.127  | 1.023    |



## HPLC chromatogram of racemic 3sc

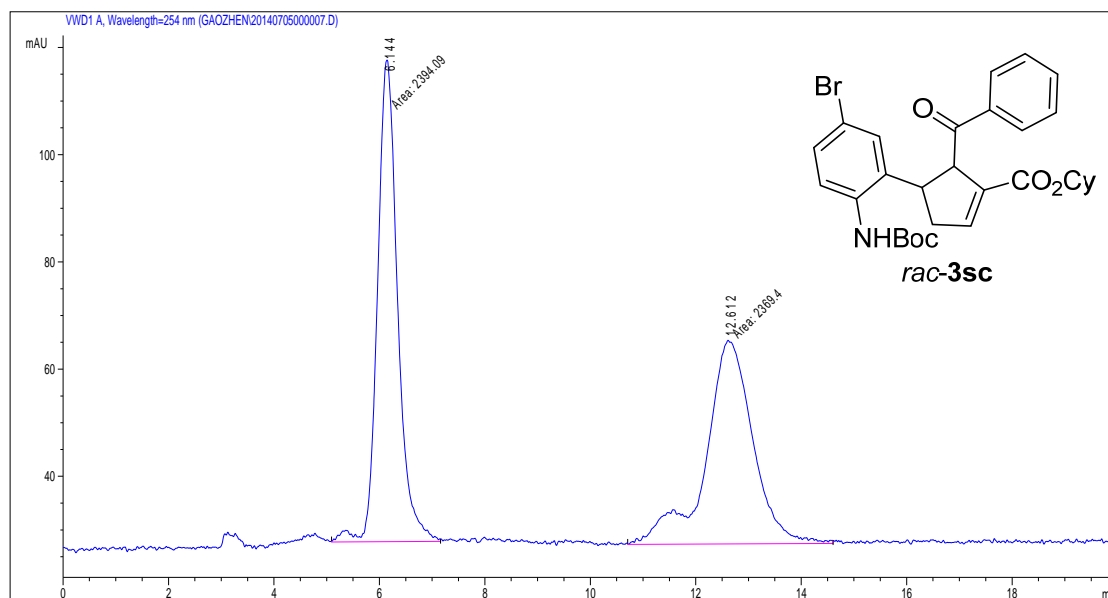

| # | Time   | Area   | Height | Width  | Area%  | Symmetry |
|---|--------|--------|--------|--------|--------|----------|
| 1 | 6.144  | 2394.1 | 89.8   | 0.4441 | 50.259 | 0.876    |
| 2 | 12.612 | 2369.4 | 38     | 1.0395 | 49.741 | 0.918    |

## HPLC chromatogram of chiral 3sc

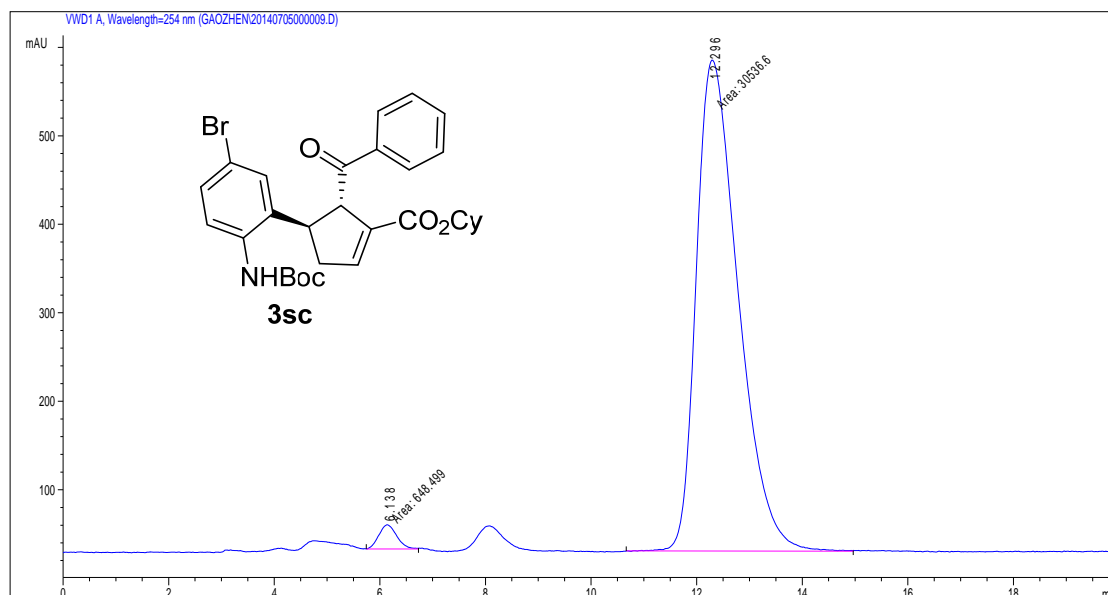

| # | Time   | Area    | Height | Width  | Area%  | Symmetry |
|---|--------|---------|--------|--------|--------|----------|
| 1 | 6.138  | 648.5   | 27.4   | 0.3941 | 2.080  | 0.848    |
| 2 | 12.296 | 30536.6 | 554.9  | 0.9172 | 97.920 | 0.595    |

## HPLC chromatogram of racemic 3tc

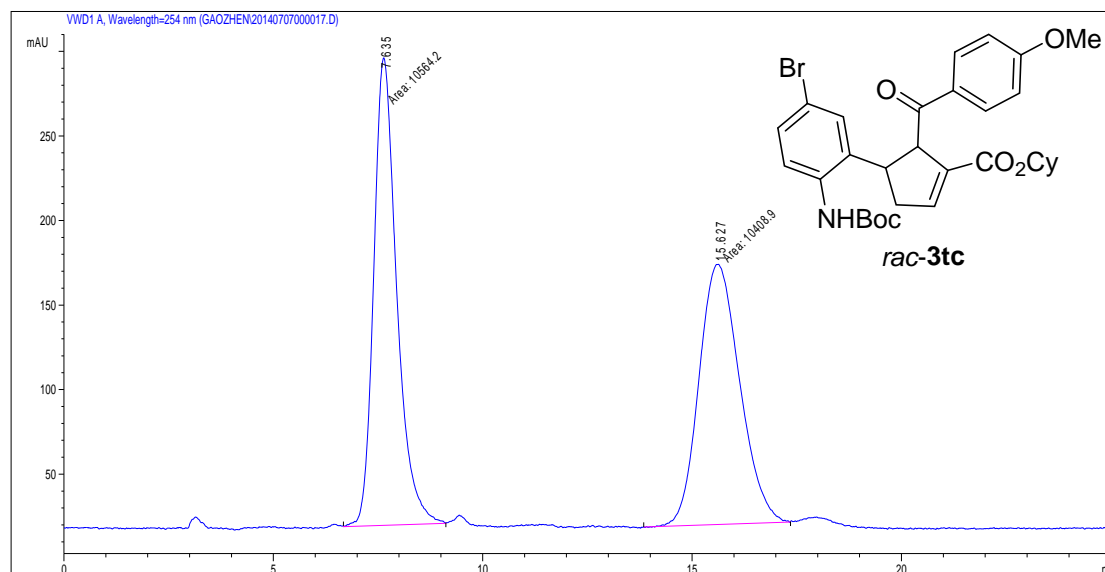

| # | Time   | Area    | Height | Width  | Area%  | Symmetry |
|---|--------|---------|--------|--------|--------|----------|
| 1 | 7.635  | 10564.2 | 276.5  | 0.6368 | 50.370 | 0.737    |
| 2 | 15.627 | 10408.9 | 153.8  | 1.1278 | 49.630 | 0.875    |

## HPLC chromatogram of chiral 3tc

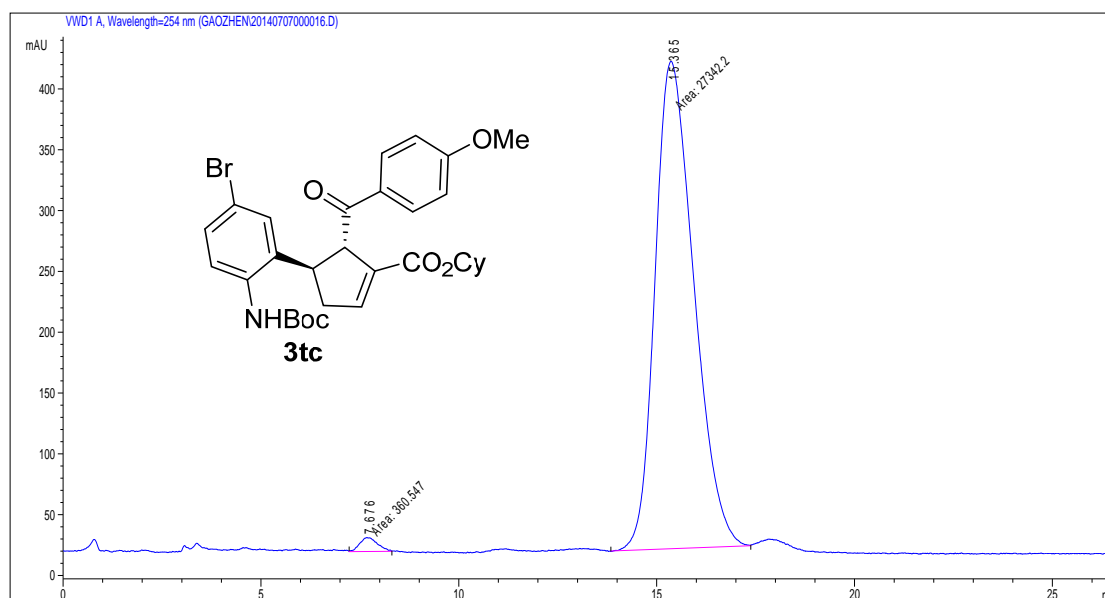

| # | Time   | Area    | Height | Width  | Area%  | Symmetry |
|---|--------|---------|--------|--------|--------|----------|
| 1 | 7.676  | 360.5   | 11.5   | 0.5236 | 1.301  | 0.669    |
| 2 | 15.365 | 27342.2 | 400.6  | 1.1375 | 98.699 | 0.689    |

## HPLC chromatogram of racemic 3uc

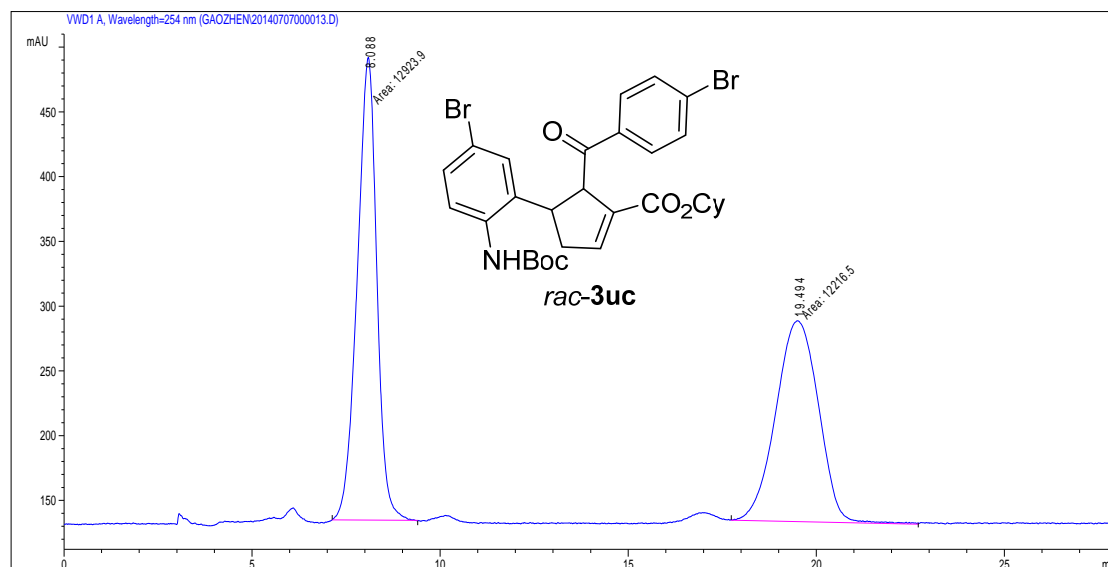

| # | Time   | Area    | Height | Width  | Area%  | Symmetry |
|---|--------|---------|--------|--------|--------|----------|
| 1 | 8.088  | 12923.9 | 357.2  | 0.6029 | 51.407 | 1.228    |
| 2 | 19.494 | 12216.5 | 155.1  | 1.3127 | 48.593 | 0.989    |

## HPLC chromatogram of chiral 3uc

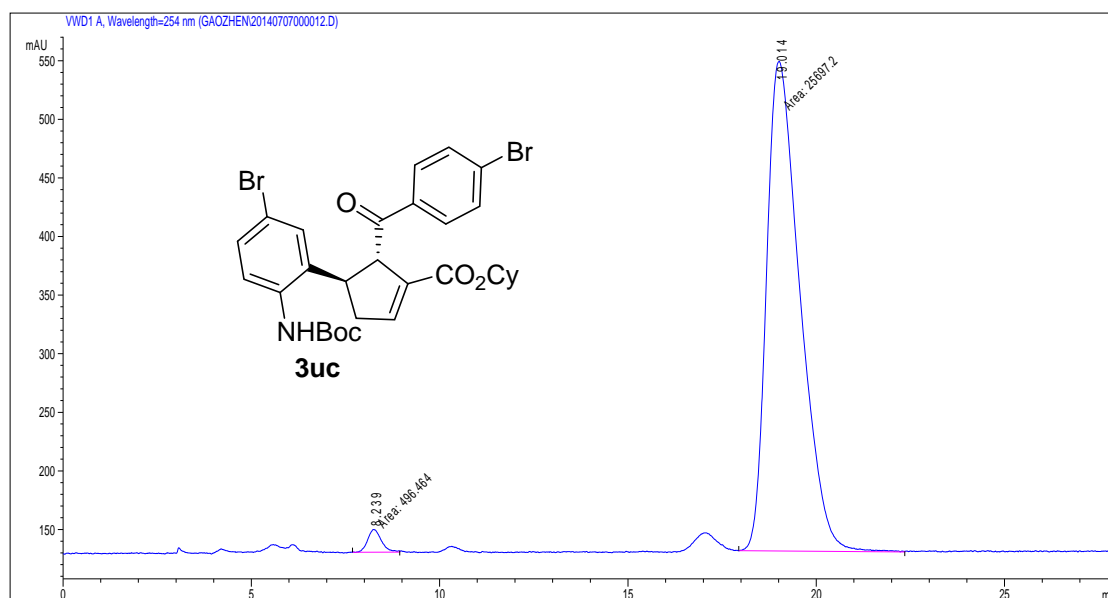

| # | Time   | Area    | Height | Width  | Area%  | Symmetry |
|---|--------|---------|--------|--------|--------|----------|
| 1 | 8.239  | 496.5   | 19.4   | 0.426  | 1.895  | 0.705    |
| 2 | 19.014 | 25697.2 | 417.8  | 1.0252 | 98.105 | 0.588    |

## HPLC chromatogram of racemic 3vc

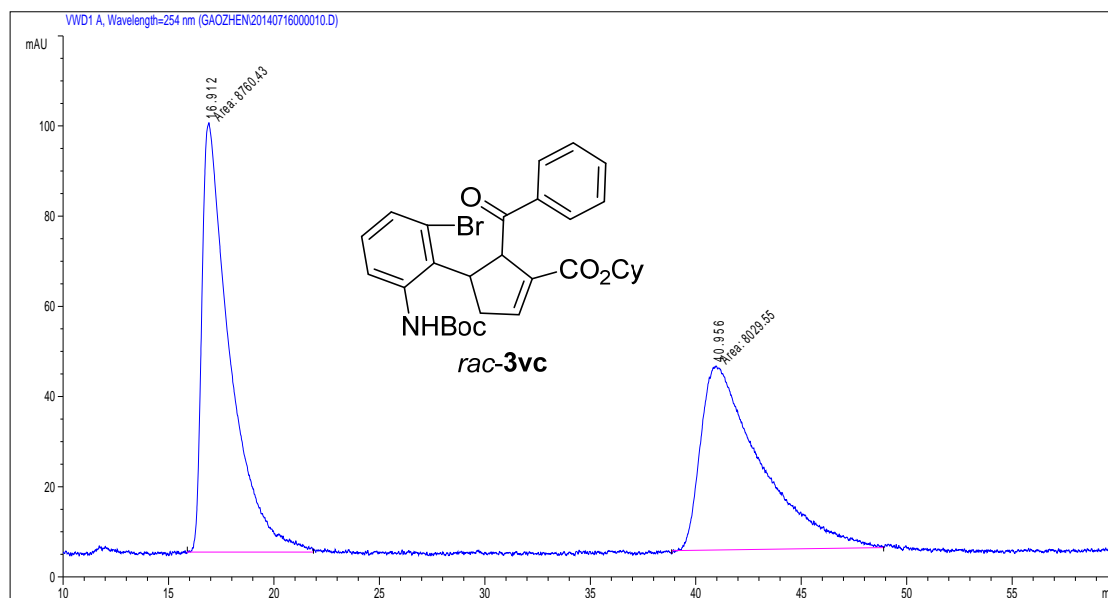

| # | Time   | Area   | Height | Width  | Area%  | Symmetry |
|---|--------|--------|--------|--------|--------|----------|
| 1 | 16.912 | 8760.4 | 95.4   | 1.5329 | 52.177 | 0.322    |
| 2 | 40.956 | 8029.5 | 40.8   | 3.2815 | 47.823 | 0.338    |

## HPLC chromatogram of chiral 3vc

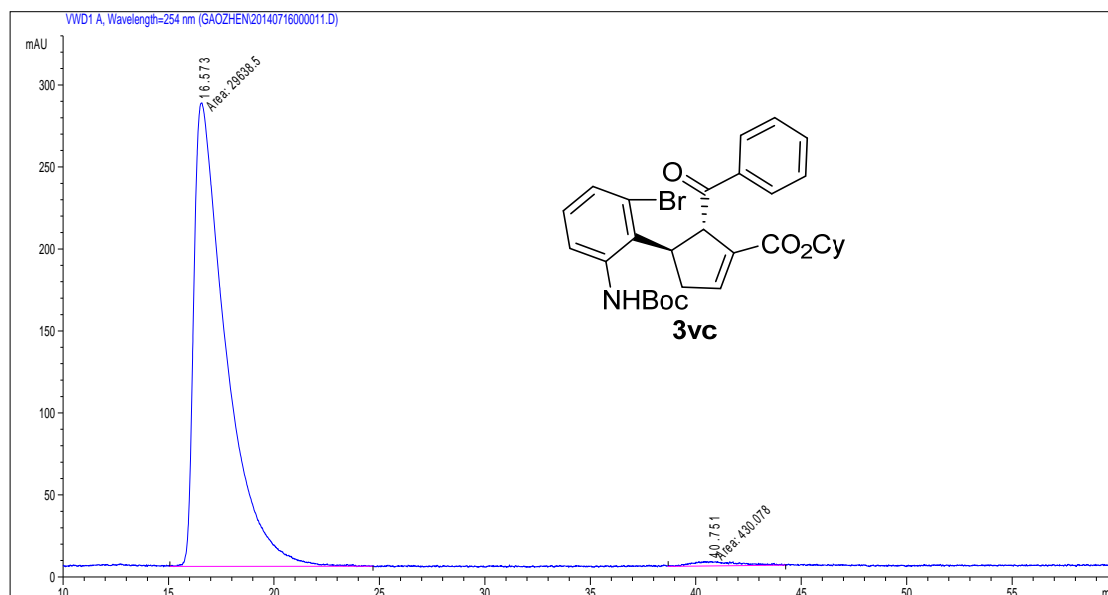

| # | Time   | Area    | Height | Width  | Area%  | Symmetry |
|---|--------|---------|--------|--------|--------|----------|
| 1 | 16.573 | 29638.5 | 282.7  | 1.7476 | 98.570 | 0.316    |
| 2 | 40.751 | 430.1   | 2.7    | 2.6236 | 1.430  | 0.759    |

## HPLC chromatogram of racemic 3wc

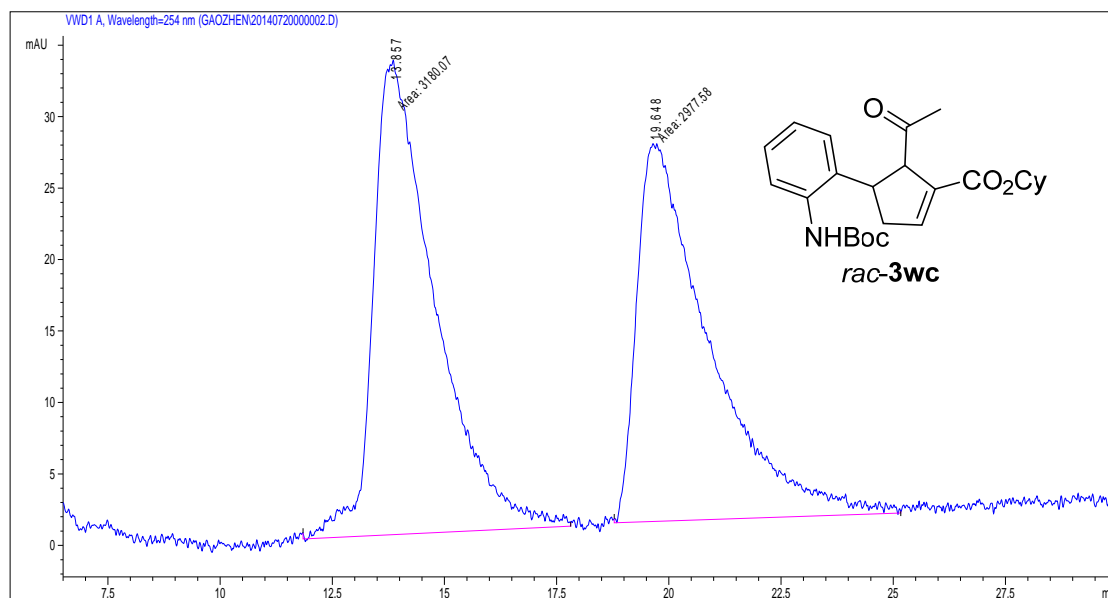

| # | Time   | Area   | Height | Width  | Area%  | Symmetry |
|---|--------|--------|--------|--------|--------|----------|
| 1 | 13.857 | 3180.1 | 33.2   | 1.5972 | 51.644 | 0.471    |
| 2 | 19.648 | 2977.6 | 26.4   | 1.877  | 48.356 | 0.284    |

## HPLC chromatogram of chiral 3wc

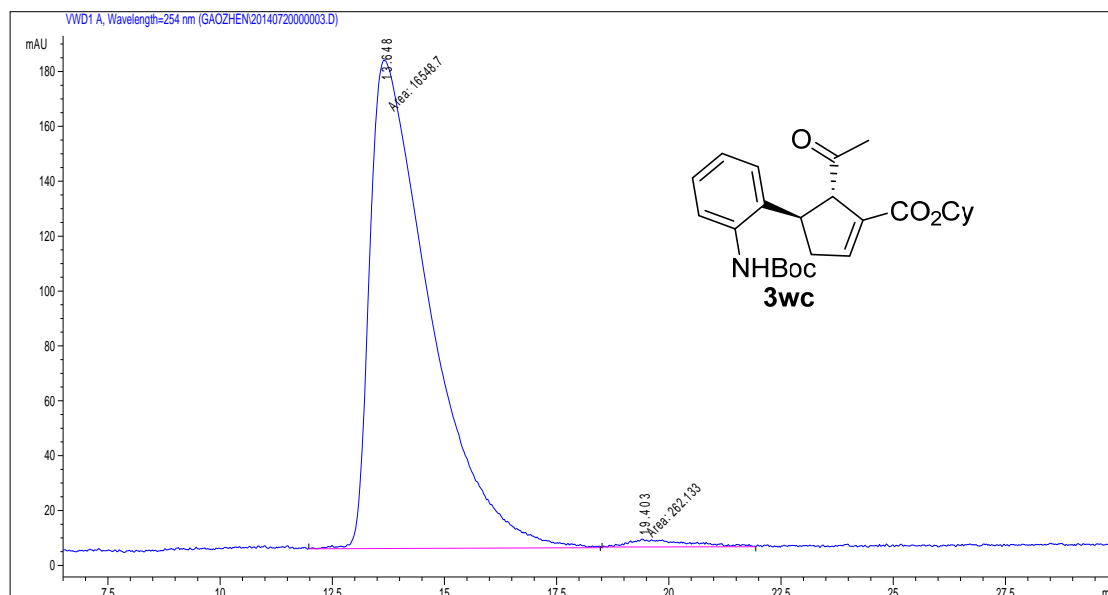

| # | Time   | Area    | Height | Width  | Area%  | Symmetry |
|---|--------|---------|--------|--------|--------|----------|
| 1 | 13.648 | 16548.7 | 177.9  | 1.5502 | 98.441 | 0.303    |
| 2 | 19.403 | 262.1   | 2.9    | 1.5257 | 1.559  | 0.311    |

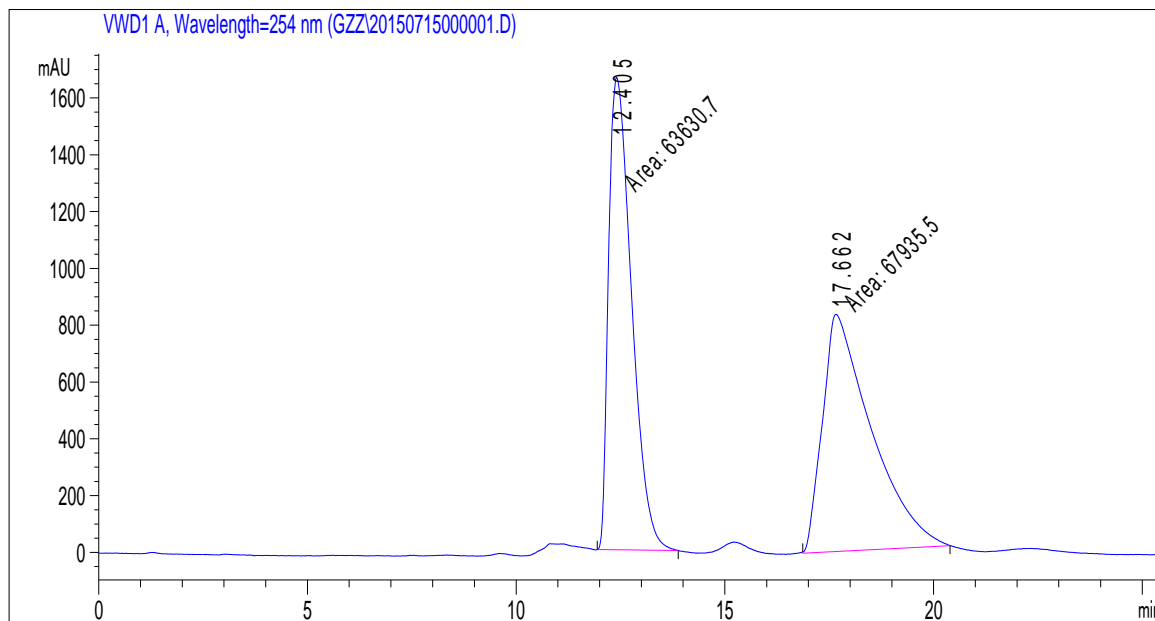

| # | Time   | Area    | Height | Width  | Area%  | Symmetry |
|---|--------|---------|--------|--------|--------|----------|
| 1 | 12.405 | 63630.7 | 1662.6 | 0.6379 | 48.364 | 0.515    |
| 2 | 17.662 | 67935.5 | 835.4  | 1.3553 | 51.636 | 0.379    |

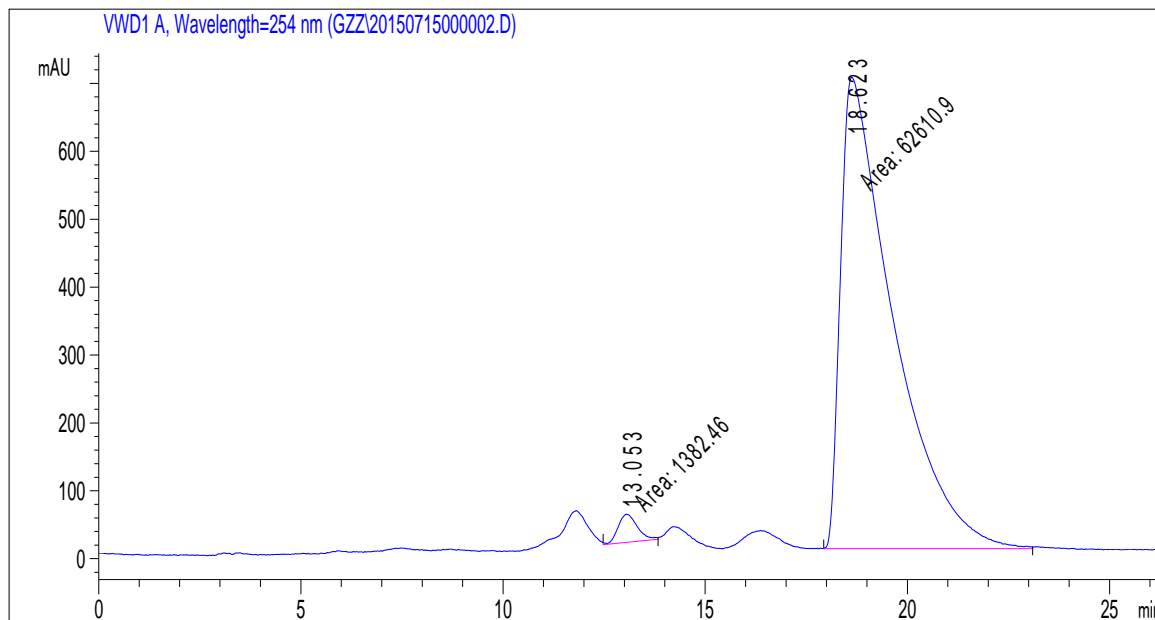

| # | Time   | Area    | Height | Width  | Area%  | Symmetry |
|---|--------|---------|--------|--------|--------|----------|
| 1 | 13.053 | 1382.5  | 41.6   | 0.5537 | 2.160  | 0.785    |
| 2 | 18.623 | 62610.9 | 694.4  | 1.5027 | 97.840 | 0.265    |

## X-Ray Crystallography Data

Crystallographic data for **3ab** has been deposited with the Cambridge Crystallographic Data Centre as deposition number CCDC 995194 and 995195. These data can be obtained free of charge via [www.ccdc.cam.ac.uk/data\\_request/cif](http://www.ccdc.cam.ac.uk/data_request/cif), or by emailing [data\\_request@ccdc.cam.ac.uk](mailto:data_request@ccdc.cam.ac.uk), or by contacting The Cambridge Crystallographic Data Centre, 12, Union Road, Cambridge CB2 1EZ, UK; fax: +44 1223 336033.

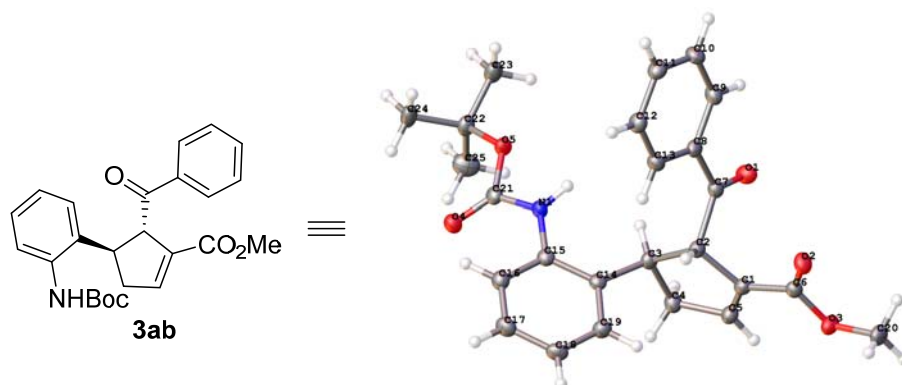

**Table 1.** Crystal data and structure refinement for **3ab**

|                                                |                                                                                       |
|------------------------------------------------|---------------------------------------------------------------------------------------|
| Identification code                            | <b>3ab</b>                                                                            |
| Empirical formula                              | C <sub>25</sub> H <sub>27</sub> NO <sub>5</sub>                                       |
| Formula weight                                 | 421.48                                                                                |
| Temperature                                    | 109.7 K                                                                               |
| Crystal system                                 | monoclinic                                                                            |
| Space group                                    | P21                                                                                   |
| Unit cell dimensions                           | a = 10.7274(4) Å = 90°.<br>b = 10.1113(7) Å = 99.118(4)°.<br>c = 20.9352(11) Å = 90°. |
| Volume                                         | 2242.1(2) Å <sup>3</sup>                                                              |
| Z                                              | 4                                                                                     |
| ρ <sub>calc</sub>                              | 1.249 mg mm <sup>-3</sup>                                                             |
| μ                                              | 0.706 mm <sup>-1</sup>                                                                |
| F(000)                                         | 896                                                                                   |
| Crystal size                                   | 0.45 × 0.35 × 0.08 mm <sup>3</sup>                                                    |
| Theta range for data collection                | 8.34 to 141.92°                                                                       |
| Index ranges                                   | -13 ≤ h ≤ 13, -10 ≤ k ≤ 12, -25 ≤ l ≤ 25                                              |
| Reflections collected                          | 16436                                                                                 |
| Independent reflections                        | 7480[R(int) = 0.0253 (inf-0.9 Å)]                                                     |
| Data/restraints/parameters                     | 7480/1/567                                                                            |
| Goodness-of-fit on F <sup>2</sup>              | 1.040                                                                                 |
| Final R indexes [I > 2σ (I) i.e. Fo > 4σ (Fo)] | R1 = 0.0391, wR2 = 0.1006                                                             |
| Final R indexes [all data]                     | R1 = 0.0415, wR2 = 0.1032                                                             |
| Largest diff. peak/hole                        | 0.260/-0.194 e Å <sup>-3</sup>                                                        |
| Flack Parameters                               | -0.06(13)                                                                             |
| Completeness                                   | 0.983                                                                                 |

**Table 2.** Fractional atomic coordinates ( $\times 10^4$ ) and equivalent isotropic displacement parameters ( $\text{\AA}^2 \times 10^3$ ) for **3ab**.  $U(\text{eq})$  is defined as 1/3 of the trace of the orthogonalised  $U^{ij}$  tensor.

| Atom | <i>x</i>    | <i>y</i>    | <i>z</i>    | $U(\text{eq})$ |
|------|-------------|-------------|-------------|----------------|
| O1   | -2396.8(13) | -3549.5(17) | -1981.2(7)  | 27.0(3)        |
| O2   | -3749.8(14) | -537.3(16)  | -1801.3(6)  | 25.8(3)        |
| O3   | -5689.3(13) | -1356.2(17) | -1759.1(7)  | 25.9(3)        |
| O4   | -2488.4(13) | -5406.4(16) | -5384.1(6)  | 25.0(3)        |
| O5   | -1257.9(13) | -6227.2(16) | -4484.1(6)  | 23.4(3)        |
| N1   | -2300.5(15) | -4386.1(18) | -4388.9(7)  | 20.6(3)        |
| C1   | -4570.8(18) | -2236(2)    | -2536.2(9)  | 20.7(4)        |
| C2   | -3417.2(17) | -2275(2)    | -2869.4(9)  | 19.6(4)        |
| C3   | -3783.8(18) | -3323(2)    | -3428.0(9)  | 19.7(4)        |
| C4   | -5124.3(19) | -3840(2)    | -3340.3(9)  | 24.7(4)        |
| C5   | -5467.9(18) | -3059(2)    | -2784.6(9)  | 22.3(4)        |
| C6   | -4596.6(17) | -1287(2)    | -1997.3(9)  | 19.8(4)        |
| C7   | -2266.5(18) | -2742(2)    | -2395.4(9)  | 20.5(4)        |
| C8   | -979.6(18)  | -2221(2)    | -2460.6(9)  | 20.2(4)        |
| C9   | 41.1(19)    | -2631(2)    | -2008.9(9)  | 24.1(4)        |
| C10  | 1255.1(19)  | -2192(2)    | -2045.2(10) | 26.5(5)        |
| C11  | 1453.2(18)  | -1324(2)    | -2539(1)    | 25.9(5)        |
| C12  | 443.6(19)   | -922(2)     | -2992.8(9)  | 25.6(4)        |
| C13  | -771.3(19)  | -1365(2)    | -2959.2(9)  | 23.1(4)        |
| C14  | -3772.2(17) | -2729(2)    | -4095.9(9)  | 19.7(4)        |
| C15  | -3071.3(17) | -3262(2)    | -4548.9(9)  | 20.1(4)        |
| C16  | -3132.7(18) | -2670(2)    | -5157.5(9)  | 24.3(4)        |
| C17  | -3881(2)    | -1570(2)    | -5322.1(10) | 26.7(5)        |
| C18  | -4589.8(19) | -1034(2)    | -4881.3(10) | 25.8(4)        |
| C19  | -4525.8(18) | -1623(2)    | -4276.6(10) | 23.8(4)        |
| C20  | -5859(2)    | -356(3)     | -1285(1)    | 29.5(5)        |
| C21  | -2059.2(17) | -5355(2)    | -4811.9(9)  | 20.4(4)        |



|     |             |              |             |         |
|-----|-------------|--------------|-------------|---------|
| C22 | -1008.6(19) | -7514(2)     | -4776.4(9)  | 24.6(4) |
| C23 | -125(2)     | -8179(3)     | -4229.7(10) | 30.4(5) |
| C24 | -348(2)     | -7297(3)     | -5364.5(10) | 33.4(5) |
| C25 | -2229(2)    | -8286(3)     | -4932.7(13) | 37.7(5) |
| O6  | -2424.7(14) | -8244(2)     | -3190.6(7)  | 34.7(4) |
| O7  | -1125.8(13) | -5113.4(16)  | -3081.1(6)  | 23.9(3) |
| O8  | 846.3(13)   | -5906.2(17)  | -2847.0(7)  | 26.7(3) |
| O9  | -2601.1(17) | -9587.4(19)  | 618.8(7)    | 35.4(4) |
| O10 | -3217.6(14) | -11012.3(17) | -213.2(7)   | 28.4(3) |
| N2  | -2467.7(17) | -9084.4(19)  | -443.8(8)   | 24.2(4) |
| C26 | -729.6(18)  | -6889(2)     | -2340.3(9)  | 20.8(4) |
| C27 | -2079.5(18) | -6961(2)     | -2212.9(9)  | 20.1(4) |
| C28 | -1963.5(18) | -7874(2)     | -1605.2(9)  | 21.1(4) |
| C29 | -774(2)     | -8728(2)     | -1664.4(10) | 27.0(5) |
| C30 | -33.2(19)   | -7856(2)     | -2048.0(9)  | 24.7(4) |
| C31 | -384.7(18)  | -5876(2)     | -2793.4(8)  | 19.4(4) |
| C32 | -2897.2(19) | -7680(2)     | -2775.8(9)  | 21.9(4) |
| C33 | -4297.2(18) | -7750(2)     | -2782.2(9)  | 22.1(4) |
| C34 | -4982(2)    | -8621(2)     | -3219.6(9)  | 24.7(4) |
| C35 | -6271(2)    | -8770(2)     | -3241.7(10) | 27.1(5) |
| C36 | -6899.6(19) | -8012(3)     | -2836.2(10) | 29.5(5) |
| C37 | -6230(2)    | -7132(3)     | -2403.5(10) | 29.3(5) |
| C38 | -4925(2)    | -7003(2)     | -2367.8(9)  | 24.4(4) |
| C39 | -1743.3(18) | -7139(2)     | -962.1(9)   | 20.1(4) |
| C40 | -1946.5(18) | -7799(2)     | -391.7(9)   | 21.9(4) |
| C41 | -1612(2)    | -7183(3)     | 207.1(10)   | 31.4(5) |
| C42 | -1077(2)    | -5932(3)     | 243.9(10)   | 35.8(6) |
| C43 | -878(2)     | -5258(3)     | -307.2(11)  | 31.4(5) |
| C44 | -1224.2(19) | -5876(2)     | -906.1(10)  | 24.5(4) |
| C45 | 1226(2)     | -4959(3)     | -3302(1)    | 30.9(5) |
| C46 | -2745.4(19) | -9875(2)     | 49.8(9)     | 24.7(4) |

|     |          |           |            |         |
|-----|----------|-----------|------------|---------|
| C47 | -3488(2) | -12128(3) | 203.1(11)  | 31.2(5) |
| C48 | -2289(2) | -12495(3) | 654.2(12)  | 36.5(6) |
| C49 | -3877(3) | -13223(3) | -285.8(13) | 40.8(6) |
| C50 | -4570(2) | -11749(3) | 563.1(12)  | 39.6(6) |

**Table 3.** Anisotropic Displacement Parameters ( $\text{\AA}^2 \times 10^3$ ) for **3ab**. The Anisotropic displacement factor exponent takes the form:  $-2\pi^2[h^2a^{*2}U^{11} + \dots + 2hka \times b \times U^{12}]$

| Atom | $U_{11}$ | $U_{22}$ | $U_{33}$ | $U_{23}$ | $U_{13}$ | $U_{12}$ |
|------|----------|----------|----------|----------|----------|----------|
| O1   | 24.4(7)  | 29.1(9)  | 27.8(7)  | 6.7(6)   | 4.6(6)   | 0.5(6)   |
| O2   | 28.9(7)  | 27.1(9)  | 21.3(6)  | -4.9(6)  | 3.8(5)   | -5.0(6)  |
| O3   | 22.6(6)  | 30.3(9)  | 25.7(7)  | -9.7(6)  | 6.0(5)   | 0.3(6)   |
| O4   | 28.1(7)  | 26.3(9)  | 20.0(6)  | 0.2(6)   | 2.2(5)   | 3.3(6)   |
| O5   | 26.5(7)  | 23.6(9)  | 20.0(6)  | -2.4(6)  | 3.2(5)   | 7.5(6)   |
| N1   | 22.5(7)  | 23.8(10) | 15.2(7)  | 1.6(6)   | 2.7(6)   | 4.7(7)   |
| C1   | 19.7(8)  | 23.4(12) | 19.2(8)  | 2.4(8)   | 3.5(7)   | 3.7(8)   |
| C2   | 19.6(8)  | 20.9(11) | 18.6(8)  | -1.8(8)  | 3.5(7)   | 0.5(8)   |
| C3   | 22.3(9)  | 18.0(11) | 18.9(9)  | -1.6(7)  | 3.3(7)   | 1.6(8)   |
| C4   | 26.8(10) | 26.8(13) | 20.6(9)  | -2.9(8)  | 4.3(7)   | -2.6(9)  |
| C5   | 21.3(9)  | 25.0(12) | 21.6(9)  | -2.0(8)  | 5.7(7)   | 0.2(8)   |
| C6   | 21.3(9)  | 19.7(11) | 18.3(8)  | 0.9(7)   | 2.8(7)   | 2.4(8)   |
| C7   | 23.0(9)  | 21.4(11) | 17.3(8)  | -1.4(8)  | 3.7(7)   | 0.8(8)   |
| C8   | 20.1(8)  | 21.9(11) | 18.5(8)  | -6.3(8)  | 3.3(7)   | -0.4(8)  |
| C9   | 26.5(10) | 26.9(12) | 18.8(9)  | 1.0(8)   | 2.8(7)   | -2.7(9)  |
| C10  | 22.4(9)  | 33.6(14) | 21.5(9)  | -0.4(9)  | -2.2(7)  | 0.0(9)   |
| C11  | 20.8(9)  | 29.6(13) | 28(1)    | -3.6(9)  | 5.7(7)   | -3.2(9)  |
| C12  | 27.2(10) | 27.1(13) | 23.6(9)  | 3.5(8)   | 7.4(7)   | 0.0(9)   |
| C13  | 24.0(9)  | 25.0(12) | 19.7(9)  | 1.7(8)   | 2.0(7)   | 3.2(8)   |
| C14  | 17.5(8)  | 21.6(11) | 19.4(9)  | -1.1(8)  | 1.1(6)   | -1.6(8)  |
| C15  | 18.0(8)  | 21.4(11) | 20.7(8)  | -0.4(7)  | 2.4(7)   | -2.3(8)  |
| C16  | 24.6(9)  | 26.7(13) | 22.0(9)  | -0.1(8)  | 5.3(7)   | -0.5(9)  |
| C17  | 28.9(10) | 26.4(13) | 24.1(9)  | 6.1(8)   | 1.6(8)   | 0.7(9)   |

|     |          |          |          |          |         |          |
|-----|----------|----------|----------|----------|---------|----------|
| C18 | 25.1(9)  | 21.6(12) | 28.8(10) | 3.2(9)   | -1.4(7) | 4.2(9)   |
| C19 | 23.1(9)  | 23.3(12) | 25.0(9)  | -0.6(8)  | 3.7(7)  | 2.8(8)   |
| C20 | 29.3(10) | 34.3(14) | 25.4(10) | -11.3(9) | 5.9(8)  | 4.4(9)   |
| C21 | 19.2(8)  | 23.0(12) | 19.7(9)  | 1.5(8)   | 5.7(7)  | -2.5(8)  |
| C22 | 31.2(10) | 21.0(12) | 22.6(9)  | -3.1(8)  | 7.3(8)  | 4.2(9)   |
| C23 | 37.4(11) | 28.9(13) | 26.6(10) | 1.7(9)   | 10.6(8) | 12(1)    |
| C24 | 44.2(12) | 34.9(15) | 23.8(10) | 0.4(9)   | 13.5(9) | 15.4(11) |
| C25 | 39.2(12) | 25.6(14) | 46.2(13) | -0.1(11) | 0.1(10) | -0.7(11) |
| O6  | 27.9(7)  | 51.2(12) | 26.4(7)  | -13.2(7) | 8.2(6)  | -2.7(7)  |
| O7  | 25.9(7)  | 27.3(9)  | 18.8(6)  | 3.1(6)   | 4.5(5)  | 3.9(6)   |
| O8  | 22.5(7)  | 29.8(9)  | 28.4(7)  | 7.0(6)   | 6.1(5)  | -1.1(6)  |
| O9  | 52.9(10) | 34.3(10) | 19.8(7)  | 3.2(6)   | 8.2(6)  | -9.4(8)  |
| O10 | 35.6(8)  | 26.4(9)  | 22.5(7)  | 5.9(6)   | 2.1(6)  | -7.9(7)  |
| N2  | 33.6(9)  | 23.9(10) | 15.1(7)  | -0.6(7)  | 4.2(6)  | -5.5(7)  |
| C26 | 20.9(9)  | 23.0(12) | 18.2(8)  | -3.9(8)  | 2.2(7)  | 1.1(8)   |
| C27 | 23.5(9)  | 20.7(12) | 16.8(8)  | 1.3(7)   | 4.8(7)  | -0.4(8)  |
| C28 | 26.6(9)  | 19.0(11) | 17.7(8)  | 0.6(8)   | 3.4(7)  | -4.2(8)  |
| C29 | 37.4(11) | 22.2(12) | 22.1(9)  | 1.1(8)   | 7.0(8)  | 3.2(9)   |
| C30 | 27.6(9)  | 28.0(13) | 18.8(9)  | -1.6(8)  | 4.5(7)  | 3.2(9)   |
| C31 | 21.5(9)  | 20.2(11) | 16.2(8)  | -3.8(7)  | 2.0(7)  | 0.9(8)   |
| C32 | 26.2(9)  | 23.0(12) | 17.0(8)  | 3.5(8)   | 4.9(7)  | 0.6(8)   |
| C33 | 24.8(9)  | 24.8(12) | 16.7(8)  | 6.0(8)   | 3.1(7)  | 2.1(8)   |
| C34 | 29.1(10) | 25.2(12) | 20.0(9)  | 2.2(8)   | 4.5(7)  | 4.2(9)   |
| C35 | 29(1)    | 28.0(13) | 22.7(9)  | 1.0(8)   | -0.5(8) | -4.1(9)  |
| C36 | 22.4(9)  | 39.0(15) | 27.2(10) | 5.8(9)   | 4.3(8)  | 0.7(9)   |
| C37 | 28.3(10) | 33.9(14) | 26.7(10) | 0.4(9)   | 7.6(8)  | 1.3(9)   |
| C38 | 27.9(10) | 24.9(12) | 20.0(9)  | 0.2(8)   | 2.8(7)  | -0.3(8)  |
| C39 | 20.0(8)  | 21.3(11) | 19.2(8)  | -1.0(8)  | 3.3(7)  | 0.4(8)   |
| C40 | 24.2(9)  | 20.4(11) | 21.0(9)  | -1.2(8)  | 3.3(7)  | -1.2(8)  |
| C41 | 43.7(12) | 32.3(14) | 17.8(9)  | 1.4(9)   | 3.8(8)  | -7.6(11) |
| C42 | 49.9(13) | 35.5(15) | 20.9(9)  | -9.4(10) | 1.9(9)  | -9.8(12) |

|     |          |          |          |          |          |           |
|-----|----------|----------|----------|----------|----------|-----------|
| C43 | 37.7(11) | 23.7(13) | 32.5(11) | -5.0(9)  | 4.0(9)   | -7.9(10)  |
| C44 | 29.3(10) | 20.7(12) | 24.1(9)  | -0.9(8)  | 5.6(7)   | -3.3(9)   |
| C45 | 29.6(10) | 33.3(14) | 31.6(10) | 6.6(10)  | 10.7(8)  | -4.2(10)  |
| C46 | 26.6(10) | 26.5(12) | 20.5(9)  | 5.2(8)   | 2.0(7)   | -1.6(9)   |
| C47 | 35.8(11) | 26.9(13) | 30.5(11) | 13.7(10) | 4.3(9)   | -4.6(10)  |
| C48 | 36.7(12) | 33.7(15) | 38.0(12) | 13.5(10) | 2.6(9)   | -1.5(11)  |
| C49 | 47.3(14) | 27.5(14) | 44.4(13) | 9.3(11)  | -2.5(11) | -11.5(12) |
| C50 | 33.9(11) | 44.5(17) | 40.8(13) | 18.9(12) | 6.7(10)  | -3.0(11)  |

**Table 4.** Bond Lengths for **3ab**.

| <b>Atom</b> | <b>Atom</b> | <b>Length/Å</b> | <b>Atom</b> | <b>Atom</b> | <b>Length/Å</b> |
|-------------|-------------|-----------------|-------------|-------------|-----------------|
| O1          | C7          | 1.216(3)        | O6          | C32         | 1.215(3)        |
| O2          | C6          | 1.204(3)        | O7          | C31         | 1.199(3)        |
| O3          | C6          | 1.346(2)        | O8          | C31         | 1.343(2)        |
| O3          | C20         | 1.448(2)        | O8          | C45         | 1.454(3)        |
| O4          | C21         | 1.214(2)        | O9          | C46         | 1.212(3)        |
| O5          | C21         | 1.342(3)        | O10         | C46         | 1.339(3)        |
| O5          | C22         | 1.480(3)        | O10         | C47         | 1.482(3)        |
| N1          | C15         | 1.414(3)        | N2          | C40         | 1.412(3)        |
| N1          | C21         | 1.373(3)        | N2          | C46         | 1.376(3)        |
| C1          | C2          | 1.514(3)        | C26         | C27         | 1.515(3)        |
| C1          | C5          | 1.315(3)        | C26         | C30         | 1.321(3)        |
| C1          | C6          | 1.485(3)        | C26         | C31         | 1.482(3)        |
| C2          | C3          | 1.581(3)        | C27         | C28         | 1.561(3)        |
| C2          | C7          | 1.531(3)        | C27         | C32         | 1.536(3)        |
| C3          | C4          | 1.568(3)        | C28         | C29         | 1.562(3)        |
| C3          | C14         | 1.524(3)        | C28         | C39         | 1.523(3)        |
| C4          | C5          | 1.500(3)        | C29         | C30         | 1.502(3)        |
| C7          | C8          | 1.504(3)        | C32         | C33         | 1.501(3)        |
| C8          | C9          | 1.392(3)        | C33         | C34         | 1.394(3)        |
| C8          | C13         | 1.401(3)        | C33         | C38         | 1.400(3)        |

|     |     |          |     |     |          |
|-----|-----|----------|-----|-----|----------|
| C9  | C10 | 1.389(3) | C34 | C35 | 1.384(3) |
| C10 | C11 | 1.398(3) | C35 | C36 | 1.395(3) |
| C11 | C12 | 1.384(3) | C36 | C37 | 1.386(3) |
| C12 | C13 | 1.390(3) | C37 | C38 | 1.396(3) |
| C14 | C15 | 1.408(3) | C39 | C40 | 1.415(3) |
| C14 | C19 | 1.396(3) | C39 | C44 | 1.391(3) |
| C15 | C16 | 1.400(3) | C40 | C41 | 1.395(3) |
| C16 | C17 | 1.383(3) | C41 | C42 | 1.386(4) |
| C17 | C18 | 1.395(3) | C42 | C43 | 1.385(3) |
| C18 | C19 | 1.391(3) | C43 | C44 | 1.397(3) |
| C22 | C23 | 1.522(3) | C47 | C48 | 1.516(3) |
| C22 | C24 | 1.530(3) | C47 | C49 | 1.521(4) |
| C22 | C25 | 1.514(3) | C47 | C50 | 1.529(3) |

**Table 5.** Bond Angles for **3ab**.

| Atom | Atom | Atom | Angle/°    | Atom | Atom | Atom | Angle/°    |
|------|------|------|------------|------|------|------|------------|
| C6   | O3   | C20  | 115.39(16) | C31  | O8   | C45  | 114.88(16) |
| C21  | O5   | C22  | 120.61(15) | C46  | O10  | C47  | 120.53(16) |
| C21  | N1   | C15  | 125.72(16) | C46  | N2   | C40  | 127.37(17) |
| C5   | C1   | C2   | 113.71(18) | C30  | C26  | C27  | 111.63(18) |
| C5   | C1   | C6   | 127.48(17) | C30  | C26  | C31  | 128.91(18) |
| C6   | C1   | C2   | 118.79(17) | C31  | C26  | C27  | 119.25(17) |
| C1   | C2   | C3   | 103.43(16) | C26  | C27  | C28  | 102.54(16) |
| C1   | C2   | C7   | 110.08(15) | C26  | C27  | C32  | 109.47(15) |
| C7   | C2   | C3   | 110.70(17) | C32  | C27  | C28  | 107.93(16) |
| C4   | C3   | C2   | 105.21(15) | C27  | C28  | C29  | 102.87(15) |
| C14  | C3   | C2   | 112.18(17) | C39  | C28  | C27  | 114.38(17) |
| C14  | C3   | C4   | 112.33(15) | C39  | C28  | C29  | 109.01(15) |
| C5   | C4   | C3   | 104.93(16) | C30  | C29  | C28  | 103.08(17) |
| C1   | C5   | C4   | 112.66(17) | C26  | C30  | C29  | 111.97(18) |
| O2   | C6   | O3   | 124.07(18) | O7   | C31  | O8   | 123.71(19) |
| O2   | C6   | C1   | 124.19(17) | O7   | C31  | C26  | 123.57(17) |

|     |     |     |            |     |     |     |            |
|-----|-----|-----|------------|-----|-----|-----|------------|
| O3  | C6  | C1  | 111.73(17) | O8  | C31 | C26 | 112.72(17) |
| O1  | C7  | C2  | 119.85(18) | O6  | C32 | C27 | 121.22(18) |
| O1  | C7  | C8  | 120.73(18) | O6  | C32 | C33 | 120.11(18) |
| C8  | C7  | C2  | 119.40(17) | C33 | C32 | C27 | 118.55(17) |
| C9  | C8  | C7  | 117.95(18) | C34 | C33 | C32 | 117.26(18) |
| C9  | C8  | C13 | 119.29(18) | C34 | C33 | C38 | 119.51(18) |
| C13 | C8  | C7  | 122.75(17) | C38 | C33 | C32 | 123.22(19) |
| C10 | C9  | C8  | 120.72(19) | C35 | C34 | C33 | 120.7(2)   |
| C9  | C10 | C11 | 119.66(18) | C34 | C35 | C36 | 119.8(2)   |
| C12 | C11 | C10 | 119.87(19) | C37 | C36 | C35 | 120.02(19) |
| C11 | C12 | C13 | 120.6(2)   | C36 | C37 | C38 | 120.4(2)   |
| C12 | C13 | C8  | 119.87(18) | C37 | C38 | C33 | 119.6(2)   |
| C15 | C14 | C3  | 123.38(18) | C40 | C39 | C28 | 119.50(18) |
| C19 | C14 | C3  | 118.40(17) | C44 | C39 | C28 | 121.78(17) |
| C19 | C14 | C15 | 118.20(18) | C44 | C39 | C40 | 118.39(18) |
| C14 | C15 | N1  | 120.20(17) | N2  | C40 | C39 | 118.77(17) |
| C16 | C15 | N1  | 120.05(18) | C41 | C40 | N2  | 121.52(18) |
| C16 | C15 | C14 | 119.75(19) | C41 | C40 | C39 | 119.7(2)   |
| C17 | C16 | C15 | 120.83(19) | C42 | C41 | C40 | 120.2(2)   |
| C16 | C17 | C18 | 120.25(19) | C43 | C42 | C41 | 121.3(2)   |
| C19 | C18 | C17 | 118.8(2)   | C42 | C43 | C44 | 118.2(2)   |
| C18 | C19 | C14 | 122.18(19) | C39 | C44 | C43 | 122.2(2)   |
| O4  | C21 | O5  | 126.1(2)   | O9  | C46 | O10 | 126.3(2)   |
| O4  | C21 | N1  | 125.86(19) | O9  | C46 | N2  | 126.1(2)   |
| O5  | C21 | N1  | 108.06(15) | O10 | C46 | N2  | 107.63(16) |
| O5  | C22 | C23 | 102.07(16) | O10 | C47 | C48 | 109.09(18) |
| O5  | C22 | C24 | 110.08(19) | O10 | C47 | C49 | 102.51(18) |
| O5  | C22 | C25 | 109.62(17) | O10 | C47 | C50 | 109.5(2)   |
| C23 | C22 | C24 | 110.85(18) | C48 | C47 | C49 | 110.9(2)   |
| C25 | C22 | C23 | 110.4(2)   | C48 | C47 | C50 | 112.93(19) |
| C25 | C22 | C24 | 113.23(19) | C49 | C47 | C50 | 111.4(2)   |

**Table 6.** Torsion Angles for **3ab**.

| <b>A</b> | <b>B</b> | <b>C</b> | <b>D</b> | <b>Angle/°</b> |
|----------|----------|----------|----------|----------------|
| O1       | C7       | C8       | C9       | -3.8(3)        |
| O1       | C7       | C8       | C13      | 175.2(2)       |
| N1       | C15      | C16      | C17      | -179.97(19)    |
| C1       | C2       | C3       | C4       | -2.4(2)        |
| C1       | C2       | C3       | C14      | 120.05(17)     |
| C1       | C2       | C7       | O1       | 33.8(3)        |
| C1       | C2       | C7       | C8       | -147.93(18)    |
| C2       | C1       | C5       | C4       | 0.1(3)         |
| C2       | C1       | C6       | O2       | -0.3(3)        |
| C2       | C1       | C6       | O3       | 178.96(17)     |
| C2       | C3       | C4       | C5       | 2.4(2)         |
| C2       | C3       | C14      | C15      | 125.6(2)       |
| C2       | C3       | C14      | C19      | -56.4(2)       |
| C2       | C7       | C8       | C9       | 177.92(19)     |
| C2       | C7       | C8       | C13      | -3.1(3)        |
| C3       | C2       | C7       | O1       | -79.9(2)       |
| C3       | C2       | C7       | C8       | 98.3(2)        |
| C3       | C4       | C5       | C1       | -1.7(2)        |
| C3       | C14      | C15      | N1       | -1.7(3)        |
| C3       | C14      | C15      | C16      | 178.74(18)     |
| C3       | C14      | C19      | C18      | -178.79(19)    |
| C4       | C3       | C14      | C15      | -116.1(2)      |
| C4       | C3       | C14      | C19      | 61.8(2)        |
| C5       | C1       | C2       | C3       | 1.5(2)         |
| C5       | C1       | C2       | C7       | -116.8(2)      |
| C5       | C1       | C6       | O2       | -178.3(2)      |
| C5       | C1       | C6       | O3       | 1.0(3)         |
| C6       | C1       | C2       | C3       | -176.73(17)    |
| C6       | C1       | C2       | C7       | 65.0(2)        |
| C6       | C1       | C5       | C4       | 178.15(19)     |
| C7       | C2       | C3       | C4       | 115.51(18)     |

|     |     |     |     |             |
|-----|-----|-----|-----|-------------|
| C7  | C2  | C3  | C14 | -122.08(17) |
| C7  | C8  | C9  | C10 | 179.6(2)    |
| C7  | C8  | C13 | C12 | -179.8(2)   |
| C8  | C9  | C10 | C11 | 0.3(3)      |
| C9  | C8  | C13 | C12 | -0.8(3)     |
| C9  | C10 | C11 | C12 | -0.9(3)     |
| C10 | C11 | C12 | C13 | 0.6(3)      |
| C11 | C12 | C13 | C8  | 0.3(3)      |
| C13 | C8  | C9  | C10 | 0.6(3)      |
| C14 | C3  | C4  | C5  | -119.88(18) |
| C14 | C15 | C16 | C17 | -0.4(3)     |
| C15 | N1  | C21 | O4  | -1.4(3)     |
| C15 | N1  | C21 | O5  | 177.99(17)  |
| C15 | C14 | C19 | C18 | -0.8(3)     |
| C15 | C16 | C17 | C18 | -0.1(3)     |
| C16 | C17 | C18 | C19 | 0.1(3)      |
| C17 | C18 | C19 | C14 | 0.3(3)      |
| C19 | C14 | C15 | N1  | -179.64(18) |
| C19 | C14 | C15 | C16 | 0.8(3)      |
| C20 | O3  | C6  | O2  | 6.4(3)      |
| C20 | O3  | C6  | C1  | -172.85(17) |
| C21 | O5  | C22 | C23 | -177.11(17) |
| C21 | O5  | C22 | C24 | 65.1(2)     |
| C21 | O5  | C22 | C25 | -60.0(2)    |
| C21 | N1  | C15 | C14 | 147.22(19)  |
| C21 | N1  | C15 | C16 | -33.2(3)    |
| C22 | O5  | C21 | O4  | -12.3(3)    |
| C22 | O5  | C21 | N1  | 168.32(16)  |
| O6  | C32 | C33 | C34 | 8.7(3)      |
| O6  | C32 | C33 | C38 | -172.3(2)   |
| N2  | C40 | C41 | C42 | 178.6(2)    |
| C26 | C27 | C28 | C29 | -26.53(19)  |
| C26 | C27 | C28 | C39 | 91.53(19)   |



|     |     |     |     |             |
|-----|-----|-----|-----|-------------|
| C26 | C27 | C32 | O6  | 9.8(3)      |
| C26 | C27 | C32 | C33 | -174.19(18) |
| C27 | C26 | C30 | C29 | -1.1(2)     |
| C27 | C26 | C31 | O7  | -1.6(3)     |
| C27 | C26 | C31 | O8  | 178.44(17)  |
| C27 | C28 | C29 | C30 | 26.09(19)   |
| C27 | C28 | C39 | C40 | 163.67(17)  |
| C27 | C28 | C39 | C44 | -23.0(3)    |
| C27 | C32 | C33 | C34 | -167.42(18) |
| C27 | C32 | C33 | C38 | 11.6(3)     |
| C28 | C27 | C32 | O6  | -101.1(2)   |
| C28 | C27 | C32 | C33 | 74.9(2)     |
| C28 | C29 | C30 | C26 | -16.4(2)    |
| C28 | C39 | C40 | N2  | -6.2(3)     |
| C28 | C39 | C40 | C41 | 172.83(19)  |
| C28 | C39 | C44 | C43 | -172.1(2)   |
| C29 | C28 | C39 | C40 | -81.8(2)    |
| C29 | C28 | C39 | C44 | 91.5(2)     |
| C30 | C26 | C27 | C28 | 18.2(2)     |
| C30 | C26 | C27 | C32 | -96.2(2)    |
| C30 | C26 | C31 | O7  | 172.7(2)    |
| C30 | C26 | C31 | O8  | -7.3(3)     |
| C31 | C26 | C27 | C28 | -166.60(17) |
| C31 | C26 | C27 | C32 | 79.0(2)     |
| C31 | C26 | C30 | C29 | -175.78(19) |
| C32 | C27 | C28 | C29 | 88.99(18)   |
| C32 | C27 | C28 | C39 | -152.94(16) |
| C32 | C33 | C34 | C35 | 178.11(19)  |
| C32 | C33 | C38 | C37 | -179.7(2)   |
| C33 | C34 | C35 | C36 | 2.0(3)      |
| C34 | C33 | C38 | C37 | -0.7(3)     |
| C34 | C35 | C36 | C37 | -1.3(3)     |
| C35 | C36 | C37 | C38 | -0.3(3)     |

|     |     |     |     |             |
|-----|-----|-----|-----|-------------|
| C36 | C37 | C38 | C33 | 1.3(3)      |
| C38 | C33 | C34 | C35 | -1.0(3)     |
| C39 | C28 | C29 | C30 | -95.69(18)  |
| C39 | C40 | C41 | C42 | -0.4(3)     |
| C40 | N2  | C46 | O9  | 1.1(4)      |
| C40 | N2  | C46 | O10 | -179.70(18) |
| C40 | C39 | C44 | C43 | 1.3(3)      |
| C40 | C41 | C42 | C43 | 1.0(4)      |
| C41 | C42 | C43 | C44 | -0.4(4)     |
| C42 | C43 | C44 | C39 | -0.8(3)     |
| C44 | C39 | C40 | N2  | -179.71(18) |
| C44 | C39 | C40 | C41 | -0.7(3)     |
| C45 | O8  | C31 | O7  | -1.8(3)     |
| C45 | O8  | C31 | C26 | 178.13(17)  |
| C46 | O10 | C47 | C48 | -57.3(3)    |
| C46 | O10 | C47 | C49 | -174.84(19) |
| C46 | O10 | C47 | C50 | 66.8(2)     |
| C46 | N2  | C40 | C39 | -179.3(2)   |
| C46 | N2  | C40 | C41 | 1.7(3)      |
| C47 | O10 | C46 | O9  | -7.0(3)     |
| C47 | O10 | C46 | N2  | 173.72(17)  |

**Table 7.** Hydrogen Atom Coordinates ( $\text{\AA}\times 10^4$ ) and Isotropic Displacement Parameters ( $\text{\AA}^2\times 10^3$ ) for **3ab**.

| Atom | <i>x</i> | <i>y</i> | <i>z</i> | U(eq) |
|------|----------|----------|----------|-------|
| H1   | -1944    | -4472    | -3982    | 25    |
| H2   | -3258    | -1388    | -3052    | 24    |
| H3   | -3171    | -4074    | -3362    | 24    |
| H4A  | -5743    | -3687    | -3737    | 30    |
| H4B  | -5097    | -4798    | -3241    | 30    |
| H5   | -6249    | -3148    | -2629    | 27    |
| H9   | -94      | -3218    | -1672    | 29    |
| H10  | 1947     | -2480    | -1736    | 32    |

|      |       |       |       |    |
|------|-------|-------|-------|----|
| H11  | 2279  | -1011 | -2563 | 31 |
| H12  | 582   | -339  | -3330 | 31 |
| H13  | -1459 | -1087 | -3274 | 28 |
| H16  | -2654 | -3029 | -5461 | 29 |
| H17  | -3912 | -1179 | -5737 | 32 |
| H18  | -5107 | -279  | -4992 | 31 |
| H19  | -5011 | -1261 | -3977 | 29 |
| H20A | -5143 | -380  | -930  | 44 |
| H20B | -6642 | -529  | -1114 | 44 |
| H20C | -5905 | 518   | -1490 | 44 |
| H23A | 634   | -7636 | -4114 | 46 |
| H23B | 114   | -9054 | -4371 | 46 |
| H23C | -554  | -8274 | -3852 | 46 |
| H24A | -946  | -6911 | -5718 | 50 |
| H24B | -43   | -8146 | -5504 | 50 |
| H24C | 367   | -6695 | -5248 | 50 |
| H25A | -2653 | -8309 | -4551 | 57 |
| H25B | -2043 | -9191 | -5056 | 57 |
| H25C | -2779 | -7858 | -5292 | 57 |
| H2A  | -2634 | -9417 | -837  | 29 |
| H27  | -2424 | -6070 | -2131 | 24 |
| H28  | -2726 | -8453 | -1631 | 25 |
| H29A | -287  | -8929 | -1233 | 32 |
| H29B | -1013 | -9567 | -1895 | 32 |
| H30  | 833   | -7985 | -2077 | 30 |
| H34  | -4560 | -9119 | -3506 | 30 |
| H35  | -6726 | -9387 | -3532 | 32 |
| H36  | -7787 | -8098 | -2856 | 35 |
| H37  | -6662 | -6613 | -2130 | 35 |
| H38  | -4466 | -6413 | -2065 | 29 |
| H41  | -1752 | -7622 | 591   | 38 |
| H42  | -842  | -5529 | 655   | 43 |
| H43  | -515  | -4399 | -279  | 38 |

|      |       |        |       |    |
|------|-------|--------|-------|----|
| H44  | -1101 | -5418  | -1287 | 29 |
| H45A | 733   | -5108  | -3732 | 46 |
| H45B | 2126  | -5070  | -3323 | 46 |
| H45C | 1074  | -4059  | -3158 | 46 |
| H48A | -1599 | -12608 | 403   | 55 |
| H48B | -2421 | -13324 | 877   | 55 |
| H48C | -2073 | -11791 | 974   | 55 |
| H49A | -4653 | -12964 | -572  | 61 |
| H49B | -4028 | -14039 | -57   | 61 |
| H49C | -3203 | -13370 | -544  | 61 |
| H50A | -4305 | -11012 | 858   | 59 |
| H50B | -4793 | -12510 | 812   | 59 |
| H50C | -5305 | -11482 | 250   | 59 |

[RSC Journal Format]

## Experimental

Single crystals of **3ab** (C<sub>25</sub>H<sub>27</sub>NO<sub>5</sub>) was recrystallized from [hexane/ethyl acetate] mounted in inert oil and transferred to the cold gas stream of the diffractometer.

### Crystal structure determination of 3ab

**Crystal Data.** C<sub>25</sub>H<sub>27</sub>NO<sub>5</sub>, *M* = 421.48, monoclinic, *a* = 10.7274(4) Å, *b* = 10.1113(7) Å, *c* = 20.9352(11) Å, *β* = 99.118(4)°, *U* = 2242.1(2) Å<sup>3</sup>, *T* = 109.7, space group P2<sub>1</sub> (no. 4), *Z* = 4, *μ*(Cu Kα) = 0.706, 16436 reflections measured, 7480 unique (*R*<sub>int</sub> = 0.0253) which were used in all calculations. The final *wR*(*F*<sub>2</sub>) was 0.1032 (all data).

This report has been created with Olex2, compiled on 2011.02.15 svn.r1672. Please let us know if there are any errors or if you would like to have additional features.
